# Supplementary material
Source: PubMed Central journal article supplement (PMC3568550)
Supplement: AEM.01873-12_zam003134081so1.pdf [file AEM.01873-12_zam003134081so1.pdf]

## SUPPLEMENTAL FIGURES AND TABLES

### Functional Characterization of Reductive Dehalogenases Using Blue Native Polyacrylamide Gel Electrophoresis

Shuiquan Tang<sup>1</sup>, Winnie W. M. Chan<sup>1</sup>, Kelly E. Fletcher<sup>2</sup>, Jana Seifert<sup>3</sup>, Xiaoming Liang<sup>1</sup>, Frank E. Löffler<sup>4,5</sup>, Elizabeth A. Edwards<sup>1,11</sup>, and Lorenz Adrian<sup>6</sup>

<sup>1</sup> Department of Chemical Engineering and Applied Chemistry, University of Toronto, Toronto, Ontario, M5S 3E5, Canada

<sup>2</sup> School of Civil and Environmental Engineering, Georgia Institute of Technology, 311 Ferst Drive, Atlanta, GA 30332-0512, USA

<sup>3</sup> Helmholtz Centre for Environmental Research—UFZ, Department of Proteomics, Leipzig, Germany

<sup>4</sup> Department of Microbiology and Department of Civil and Environmental Engineering, University of Tennessee, Knoxville, TN 37996, USA

<sup>5</sup> Biosciences Division, Oak Ridge National Laboratory, Oak Ridge, TN 37831, USA

<sup>6</sup> Helmholtz Centre for Environmental Research—UFZ, Department of Isotope Biogeochemistry, Leipzig, Germany

---

<sup>1</sup> Corresponding author. Mailing address: University of Toronto, 200 College St., Toronto, Ontario, M5S 3E5, Canada. Phone: (416) 946-3506. Fax: (416) 978-8605. E-mail: Elizabeth.edwards@utoronto.ca

## TABLE OF CONTENTS

### Supplemental Figures

**FIG S1.** Distribution of 1,2-DCA dechlorination activity on a BN-PAGE gel lane using protein extracts of the BAV1 culture grown on 1,2-DCA.

**FIG S2.** Dechlorination assays with protein extracts and gel slices from the KB-1 culture.

**FIG S3.** The distribution of dechlorination activity on BN-PAGE gel lanes using protein extracts of the 1,2-DCA KB-1 subculture.

**FIG S4.** Enrichment of RDase activity after separation by BN-PAGE.

### Supplemental Tables

**TABLE S1.** Specific dechlorination rates determined by methyl viologen assays with crude protein extracts.

**TABLE S2.** Peptide hits and coverage of the RDases identified from the three KB-1 cultures.

**TABLE S3.** Proteins identified from the active BN-PAGE gel slices from the three KB-1 cultures.

**TABLE S4.** Sequences in FASTA format for the custom RDase database (amino acid sequences) used as the reference database for RDase identification in the samples from the KB-1 cultures.

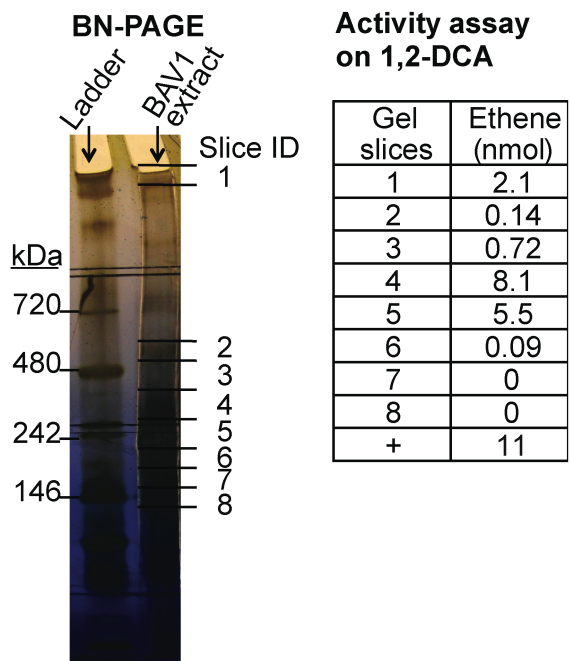

**FIG. S1. Distribution of 1,2-DCA dechlorinating activity on a BN-PAGE gel lane using protein extracts from a BAV1 culture grown on 1,2-DCA.** Horizontal lines in the gel indicate positions where the gel was cut. The numbers show nmoles of ethene produced from 1,2-DCA in the activity assay. “+”: positive control with 10  $\mu$ L crude protein extract. Fig. S1 reports similar data as in Fig. 2, but in this experiment we obtained a more comprehensive distribution of activity along the lane compared to the data shown in Fig. 2. However gel slices from the samples shown in Fig. 2 were sent for LC-MS/MS analysis, therefore that data was kept in the body of the paper.

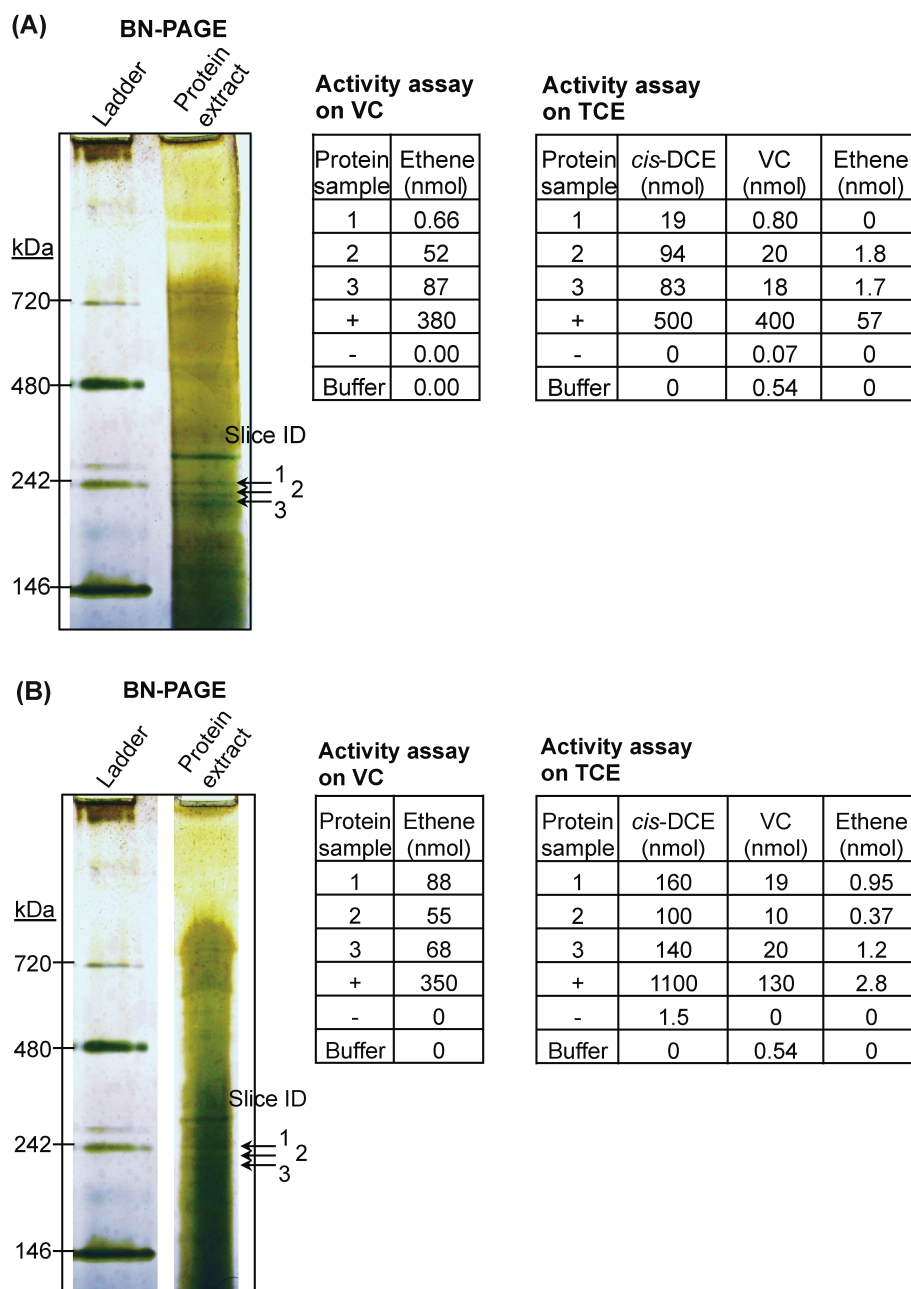

**FIG. S2. Dechlorination assays with protein extracts and gel slices from the KB-1 culture:** (A) of the VC-induced KB-1 culture and (B) of the TCE-induced KB-1 culture. “+”: positive control with 25  $\mu$ L crude protein extract; “-”: negative control with a gel slice from a region without visible bands; “Buffer”: negative control with only the assay buffer but without cell extract.

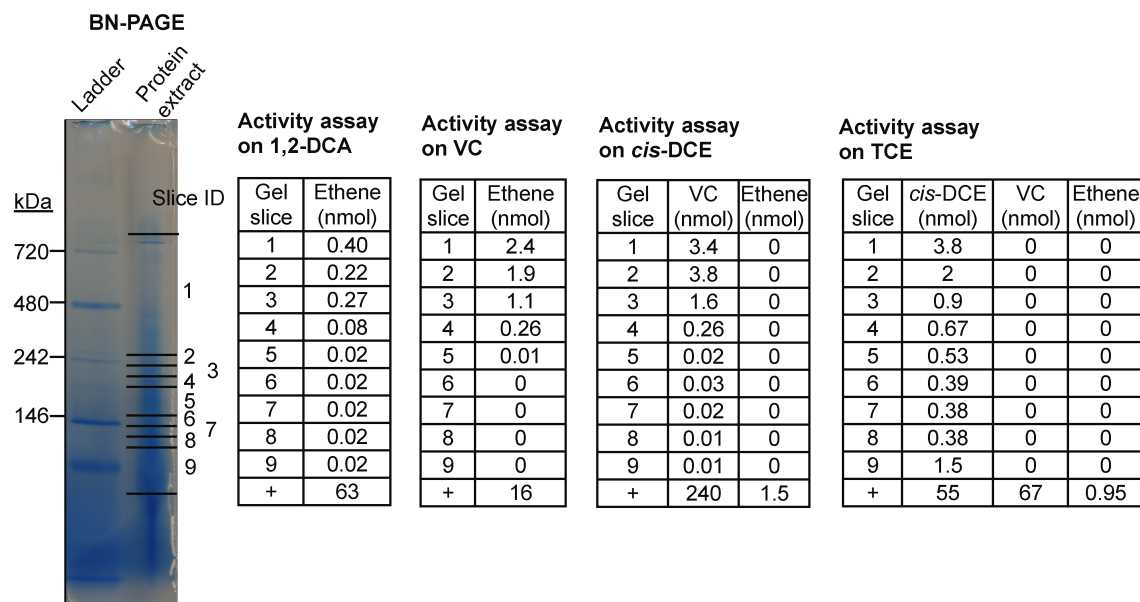

**FIG. S3. The distribution of dechlorination activity on BN-PAGE gel lanes using protein extracts of the 1,2-DCA KB-1 subculture.** Horizontal lines in the gel indicate positions where the gel was cut. The numbers show amounts of product(s) formed from different electron acceptors in the activity assay. “+”: positive control with 20  $\mu$ L crude protein extract.

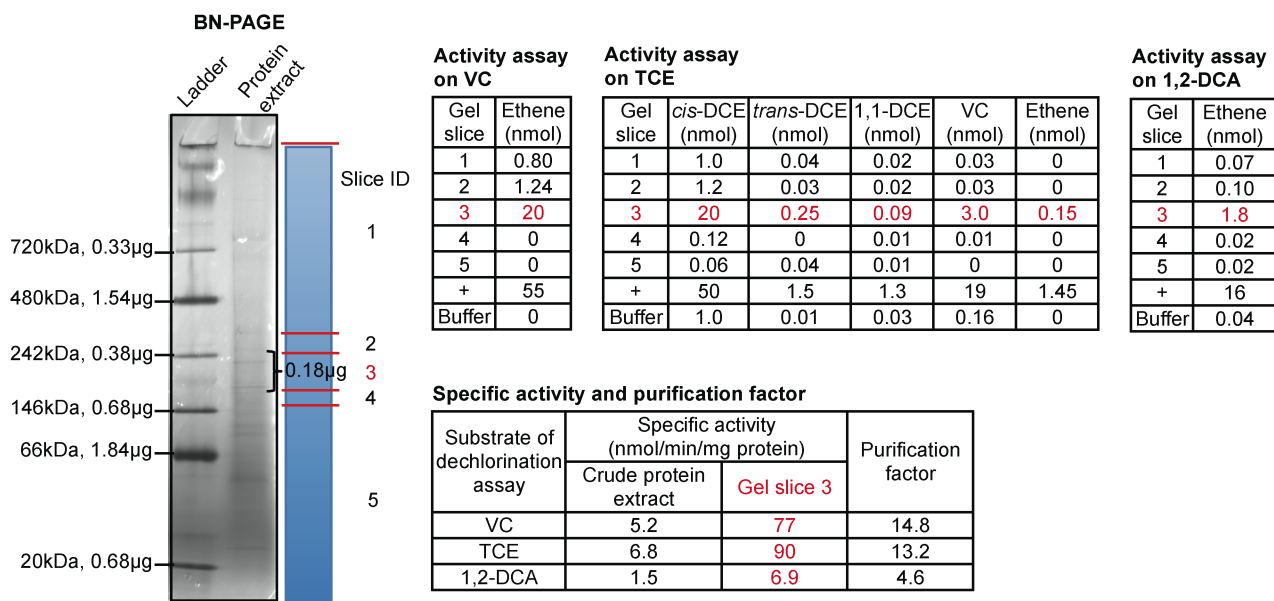

**FIG. S4. Enrichment of RDase activity after separation by BN-PAGE.** The crude protein extract from a KB-1 culture grown on TCE was applied to the gel. The results of dechlorination activity assays are shown as nmoles of dechlorination product(s). “+”: positive control with 20  $\mu$ L crude protein extract (7.4  $\mu$ g total protein); “Buffer”: negative control with assay buffer but no cell extract. The specific activity and fold purification was determined by dividing the nmoles dechlorinated in 24 hours by the concentration of protein in the respective samples.

**TABLE S1.** Specific dechlorination rates determined by methyl viologen assays with crude protein extracts.

| Enzyme assay<br>substrate: | Estimated Specific Dechlorinating Activity <sup>a</sup><br>(nmol · min <sup>-1</sup> · mg protein <sup>-1</sup> ) |               |                              |
|----------------------------|-------------------------------------------------------------------------------------------------------------------|---------------|------------------------------|
|                            | Culture<br>(growth substrate)                                                                                     |               |                              |
|                            | BAV1<br>( <i>cis</i> -DCE)                                                                                        | KB-1<br>(TCE) | KB-1 subculture<br>(1,2-DCA) |
| PCE                        | 0                                                                                                                 | 0.47 ± 0.02   | 0.14 ± 0.03                  |
| TCE                        | 1.2 ± 0.1                                                                                                         | 7.0 ± 1.0     | 6.6 ± 1.2                    |
| <i>cis</i> -DCE            | 23 ± 4                                                                                                            | 16 ± 2        | 11 ± 2                       |
| <i>trans</i> -DCE          | 12 ± 1                                                                                                            | 0.57 ± 0.04   | 0.24 ± 0.04                  |
| 1,1-DCE                    | 32 ± 3                                                                                                            | N/A           | N/A                          |
| VC                         | 0.94 ± 0.08                                                                                                       | 3.6 ± 0.8     | 0.56 ± 0.10                  |
| 1,2-DCA                    | 4.7 ± 0.5                                                                                                         | 6.0 ± 1.1     | 2.9 ± 0.5                    |

<sup>a</sup> Calculated as nmol dechlorination products formed after 24 hours divided by the time (1440 min) and divided by the protein content. Shown are results of triplicate samples ± SD. N/A: not measured

**TABLE S2.** Peptide hits and coverage of the RDases identified from the three KB-1 cultures<sup>a</sup>.

| <b>Culture: TCE-Induced KB-1</b> |                           |              |      |      |              |      |      |
|----------------------------------|---------------------------|--------------|------|------|--------------|------|------|
| RDases                           | Accession Number          | Peptide Hits |      |      | Coverage (%) |      |      |
|                                  |                           | TCE1         | TCE2 | TCE3 | TCE1         | TCE2 | TCE3 |
| KB1_VcrA                         | DCKB1_96900 <sup>b</sup>  | 39           | 59   | 61   | 36           | 36   | 42   |
| KB1_GeobRD                       | 393716494 <sup>c,d</sup>  | 8            | 15   | 17   | 17           | 28   | 26   |
| KB1_BvcA                         | 77176863 <sup>c</sup>     | 5            | 9    | 19   | 5.4          | 15   | 30   |
| KB1_TceA                         | DCKB1_14890 <sup>b</sup>  | 3            | 3    | 0    | 5.4          | 5.5  | 0    |
| KB1_RdhA5                        | DCKB1_110110 <sup>b</sup> | 0            | 3    | 2    | 0            | 7.9  | 5.8  |

  

| <b>Culture: VC-Induced KB-1</b> |                           |              |     |     |              |     |     |
|---------------------------------|---------------------------|--------------|-----|-----|--------------|-----|-----|
| RDases                          | Accession Number          | Peptide Hits |     |     | Coverage (%) |     |     |
|                                 |                           | VC1          | VC2 | VC3 | VC1          | VC2 | VC3 |
| KB1_VcrA                        | DCKB1_96900 <sup>b</sup>  | 48           | 64  | 108 | 42           | 45  | 48  |
| KB1_BvcA                        | 77176863 <sup>c</sup>     | 24           | 14  | 13  | 36           | 24  | 27  |
| KB1_TceA                        | DCKB1_14890 <sup>b</sup>  | 4            | 6   | 9   | 7.9          | 7.9 | 8   |
| KB1_GeobRD                      | 393716494 <sup>c,d</sup>  | 3            | 4   | 9   | 8.2          | 11  | 18  |
| KB1_RdhA5                       | DCKB1_110110 <sup>b</sup> | 9            | 6   | 5   | 17           | 14  | 11  |
| KB1_RdhA1                       | DCKB1_110270 <sup>b</sup> | 3            | 3   | 0   | 7.3          | 7.3 | 0   |

  

| <b>Culture: 1,2-DCA KB-1 subculture</b> |                           |              |      |      |              |      |      |
|-----------------------------------------|---------------------------|--------------|------|------|--------------|------|------|
| RDases                                  | Accession Number          | Peptide Hits |      |      | Coverage (%) |      |      |
|                                         |                           | DCA1         | DCA2 | DCA3 | DCA1         | DCA2 | DCA3 |
| KB1_VcrA                                | DCKB1_96900 <sup>b</sup>  | 8            | 16   | 9    | 24           | 33   | 29   |
| KB1_TceA                                | DCKB1_14890 <sup>b</sup>  | 10           | 9    | 7    | 21           | 18   | 13   |
| KB1_BvcA                                | 77176863 <sup>c</sup>     | 2            | 2    | 0    | 5.2          | 4.7  | 0    |
| KB1_RdhA5                               | DCKB1_110110 <sup>b</sup> | 0            | 2    | 0    | 0            | 7.4  | 0    |

<sup>a</sup> For each culture, three adjacent BN-PAGE gel slices from the region of high dechlorinating activity were analyzed by LC-MS/MS. For the TCE-Induced KB-1 culture, the slices were labeled TCE1, TCE2 and TCE3; for VC-induced KB-1 culture, they were labeled VC1, VC2 and VC3; for the 1,2-DCA KB-1 subculture, they were labeled DCA1, DCA2 and DCA3.

<sup>b</sup> IMG gene locus tag.

<sup>c</sup> NCBI GI number.

<sup>d</sup> The KB1-GeobRD (NCBI GI 393716494) was assembled from contigs from the metagenome, including the partial sequences with IMG locus tags DCKB1\_87010 and DCKB1\_86980.



**TABLE S3.** Proteins identified from the active BN-PAGE gel slices from the three KB-1 cultures. The MS spectra were searched against the KB-1 metagenome. For each culture, the results were produced from three consecutive gel slices covering the active region and each slice was analyzed by LC-MS/MS separately. RDase-related entries are highlighted in red.

Culture: TCE-Induced KB-1

| Annotation                                                                          | Putative Organism      | IMG Gene Locus Tag | Peptide Hits |    |    | Coverage |     |     |
|-------------------------------------------------------------------------------------|------------------------|--------------------|--------------|----|----|----------|-----|-----|
|                                                                                     |                        |                    | 1            | 2  | 3  | 1        | 2   | 3   |
| reductive dehalogenase, KB1_VcrA                                                    | <i>Dehalococcoides</i> | DCKB1_96900        | 24           | 35 | 35 | 36%      | 34% | 39% |
| chaperonin GroEL                                                                    | <i>Dehalococcoides</i> | DCKB1_11070        | 20           | 21 | 18 | 35%      | 32% | 31% |
| formate dehydrogenase alpha subunit                                                 | <i>Dehalococcoides</i> | DCKB1_107840       | 15           | 19 | 18 | 19%      | 23% | 22% |
| ATPases with chaperone activity, ATP-binding subunit                                | <i>Dehalococcoides</i> | DCKB1_10910        | 6            | 12 | 9  | 6%       | 16% | 11% |
| chaperone protein DnaK                                                              | <i>Dehalococcoides</i> | DCKB1_174500       | 7            | 11 | 9  | 15%      | 22% | 17% |
| Acyl-CoA synthetase                                                                 | <i>Dehalococcoides</i> | DCKB1_13860        | 7            | 10 | 15 | 9%       | 12% | 18% |
| acetyl-coenzyme A synthetase                                                        | <i>Dehalococcoides</i> | DCKB1_13470        | 7            | 8  | 4  | 13%      | 17% | 9%  |
| NADPH-dependent glutamate synthase beta chain and related oxidoreductases           | <i>Dehalococcoides</i> | DCKB1_108280       | 6            | 7  | 7  | 10%      | 15% | 13% |
| argininosuccinate synthase                                                          | <i>Dehalococcoides</i> | DCKB1_175820       | 3            | 7  | 8  | 8%       | 17% | 21% |
| D-3-phosphoglycerate dehydrogenase                                                  | <i>Dehalococcoides</i> | DCKB1_40850        | 2            | 6  | 10 | 5%       | 12% | 20% |
| 2-oxoacid:acceptor oxidoreductase, gamma subunit, pyruvate/2-ketoisovalerate family | <i>Dehalococcoides</i> | DCKB1_41690        | 6            | 6  | 0  | 31%      | 30% | 0%  |
| DNA polymerase III, beta subunit                                                    | <i>Dehalococcoides</i> | DCKB1_114230       | 4            | 6  | 7  | 13%      | 18% | 20% |
| glyceraldehyde-3-phosphate dehydrogenase                                            | <i>Dehalococcoides</i> | DCKB1_40760        | 2            | 5  | 5  | 6%       | 23% | 19% |
| ATPases with chaperone activity, ATP-binding subunit                                | <i>Dehalococcoides</i> | DCKB1_108770       | 0            | 5  | 0  | 0%       | 8%  | 0%  |
| IMP dehydrogenase family protein                                                    | <i>Dehalococcoides</i> | DCKB1_131130       | 3            | 5  | 7  | 12%      | 14% | 19% |
| Formate-tetrahydrofolate ligase                                                     | <i>Acetobacterium</i>  | DCKB1_134100       | 5            | 5  | 6  | 16%      | 16% | 18% |
| translation elongation factor 2                                                     | <i>Dehalococcoides</i> | DCKB1_13440        | 0            | 4  | 3  | 0%       | 9%  | 6%  |
| F420-non-reducing hydrogenase subunit A                                             | <i>Dehalococcoides</i> | DCKB1_40990        | 0            | 4  | 2  | 0%       | 9%  | 5%  |
| pyruvate ferredoxin oxidoreductase, alpha subunit                                   | <i>Dehalococcoides</i> | DCKB1_41710        | 5            | 4  | 2  | 15%      | 12% | 7%  |
| Partial sequence of a reductive dehalogenase KB1_GeobRD                             | <i>Geobacter</i>       | DCKB1_86980        | 3            | 4  | 4  | 13%      | 17% | 17% |
| hypothetical protein                                                                | <i>Dehalococcoides</i> | DCKB1_105500       | 2            | 4  | 2  | 13%      | 22% | 13% |
| Trypsin-like serine proteases, typically periplasmic, contain C-terminal PDZ domain | <i>Dehalococcoides</i> | DCKB1_175550       | 4            | 4  | 3  | 10%      | 9%  | 6%  |
| hypothetical protein                                                                | <i>Dehalococcoides</i> | DCKB1_10850        | 0            | 3  | 5  | 0%       | 6%  | 8%  |
| ATPase components of various ABC-type transport systems, contain duplicated ATPase  | <i>Dehalococcoides</i> | DCKB1_11590        | 0            | 3  | 2  | 0%       | 13% | 8%  |
| ABC-type multidrug transport system, ATPase component                               | <i>Dehalococcoides</i> | DCKB1_42380        | 0            | 3  | 0  | 0%       | 8%  | 0%  |
| Partial sequence of a reductive dehalogenase KB1_GeobRD                             | <i>Geobacter</i>       | DCKB1_87010        | 4            | 3  | 5  | 16%      | 13% | 18% |

|                                                                                 |                        |              |    |   |   |     |     |     |
|---------------------------------------------------------------------------------|------------------------|--------------|----|---|---|-----|-----|-----|
| translation elongation factor 1A                                                | <i>Dehalococcoides</i> | DCKB1_105110 | 2  | 3 | 4 | 7%  | 10% | 10% |
| Myo-inositol-1-phosphate synthase                                               | <i>Dehalococcoides</i> | DCKB1_105280 | 2  | 3 | 2 | 6%  | 9%  | 6%  |
| acetolactate synthase, small subunit                                            | <i>Dehalococcoides</i> | DCKB1_106470 | 0  | 3 | 0 | 0%  | 18% | 0%  |
| Polysulphide reductase                                                          | <i>Dehalococcoides</i> | DCKB1_107850 | 3  | 3 | 2 | 9%  | 7%  | 5%  |
| Polyferredoxin                                                                  | <i>Dehalococcoides</i> | DCKB1_109740 | 2  | 3 | 2 | 6%  | 9%  | 6%  |
| serine hydroxymethyltransferase                                                 | <i>Dehalococcoides</i> | DCKB1_131610 | 0  | 3 | 0 | 0%  | 10% | 0%  |
| chorismate synthase                                                             | <i>Dehalococcoides</i> | DCKB1_131870 | 2  | 3 | 0 | 4%  | 8%  | 0%  |
| 2-oxoglutarate ferredoxin oxidoreductase, beta subunit                          | <i>Geobacter</i>       | DCKB1_138890 | 7  | 3 | 5 | 21% | 10% | 18% |
| 2-oxoglutarate ferredoxin oxidoreductase, alpha subunit                         | <i>Geobacter</i>       | DCKB1_138900 | 0  | 3 | 5 | 0%  | 18% | 24% |
| Partial sequence of a reductive dehalogenase<br>KB1_BvcA                        | <i>Dehalococcoides</i> | DCKB1_247960 | 4  | 3 | 6 | 11% | 11% | 23% |
| carbamoyl-phosphate synthase large subunit                                      | <i>Dehalococcoides</i> | DCKB1_13540  | 0  | 2 | 0 | 0%  | 2%  | 0%  |
| transketolase, bacterial and yeast                                              | <i>Dehalococcoides</i> | DCKB1_41270  | 0  | 2 | 2 | 0%  | 5%  | 5%  |
| pyruvate ferredoxin oxidoreductase, beta subunit                                | <i>Dehalococcoides</i> | DCKB1_41720  | 3  | 2 | 0 | 14% | 8%  | 0%  |
| NADH:ubiquinone oxidoreductase, NADH-binding                                    | <i>Dehalococcoides</i> | DCKB1_41740  | 3  | 2 | 3 | 5%  | 4%  | 5%  |
| threonyl-tRNA synthetase                                                        | <i>Dehalococcoides</i> | DCKB1_41970  | 0  | 2 | 3 | 0%  | 5%  | 6%  |
| vacuolar-type H(+)-translocating pyrophosphatase                                | <i>Dehalococcoides</i> | DCKB1_42280  | 4  | 2 | 0 | 6%  | 4%  | 0%  |
| LSU ribosomal protein L10P                                                      | <i>Dehalococcoides</i> | DCKB1_105160 | 5  | 2 | 0 | 27% | 17% | 0%  |
| bacterial translation initiation factor 2                                       | <i>Dehalococcoides</i> | DCKB1_105240 | 0  | 2 | 0 | 0%  | 4%  | 0%  |
| histidinol-phosphate aminotransferase                                           | <i>Dehalococcoides</i> | DCKB1_106350 | 2  | 2 | 2 | 6%  | 6%  | 6%  |
| Adenylosuccinate lyase                                                          | <i>Dehalococcoides</i> | DCKB1_106380 | 11 | 2 | 0 | 24% | 5%  | 0%  |
| 3-isopropylmalate dehydratase, large subunit                                    | <i>Dehalococcoides</i> | DCKB1_106510 | 2  | 2 | 3 | 6%  | 6%  | 10% |
| 3-isopropylmalate dehydrogenase                                                 | <i>Dehalococcoides</i> | DCKB1_106530 | 3  | 2 | 2 | 8%  | 7%  | 8%  |
| ABC-type transport system involved in Fe-S cluster assembly, permease component | <i>Dehalococcoides</i> | DCKB1_106620 | 0  | 2 | 0 | 0%  | 7%  | 0%  |
| protein-export membrane protein SecD                                            | <i>Dehalococcoides</i> | DCKB1_107190 | 0  | 2 | 2 | 0%  | 5%  | 5%  |
| hydrogenases, Fe-only                                                           | <i>Dehalococcoides</i> | DCKB1_108050 | 0  | 2 | 0 | 0%  | 4%  | 0%  |
| ABC-type multidrug transport system, ATPase component                           | <i>Dehalococcoides</i> | DCKB1_108350 | 2  | 2 | 0 | 6%  | 6%  | 0%  |
| formate dehydrogenase beta subunit                                              | <i>Dehalococcoides</i> | DCKB1_108390 | 0  | 2 | 2 | 0%  | 8%  | 8%  |
| reductive dehalogenase, KB1_RdhA5                                               | <i>Dehalococcoides</i> | DCKB1_110110 | 0  | 2 | 2 | 0%  | 6%  | 6%  |
| prolyl-tRNA synthetase, family II                                               | <i>Dehalococcoides</i> | DCKB1_130980 | 2  | 2 | 0 | 4%  | 4%  | 0%  |
| uridylate kinase                                                                | <i>Dehalococcoides</i> | DCKB1_131050 | 0  | 2 | 2 | 0%  | 12% | 12% |
| methionine adenosyltransferase                                                  | <i>Dehalococcoides</i> | DCKB1_132330 | 2  | 2 | 0 | 4%  | 6%  | 0%  |
| phosphoenolpyruvate synthase                                                    | <i>Dehalococcoides</i> | DCKB1_132740 | 5  | 2 | 0 | 6%  | 3%  | 0%  |
| 2-oxoglutarate ferredoxin oxidoreductase, alpha subunit                         | <i>Geobacter</i>       | DCKB1_138910 | 0  | 2 | 0 | 0%  | 19% | 0%  |
| Dehydrogenases with different specificities                                     | <i>Dehalococcoides</i> | DCKB1_164270 | 0  | 2 | 0 | 0%  | 12% | 0%  |
| ABC-type multidrug transport system, ATPase component                           | <i>Dehalococcoides</i> | DCKB1_174980 | 0  | 2 | 0 | 0%  | 9%  | 0%  |
| protein-export membrane protein, SecD/SecF family                               | <i>Geobacter</i>       | DCKB1_242250 | 0  | 2 | 0 | 0%  | 12% | 0%  |

|                                                                                                    |                        |              |   |   |   |     |    |     |
|----------------------------------------------------------------------------------------------------|------------------------|--------------|---|---|---|-----|----|-----|
| ABC-type dipeptide/oligopeptide/nickel transport system, ATPase component                          | <i>Dehalococcoides</i> | DCKB1_11600  | 0 | 0 | 2 | 0%  | 0% | 8%  |
| ATPases with chaperone activity, ATP-binding subunit                                               | <i>Dehalococcoides</i> | DCKB1_23500  | 3 | 0 | 3 | 10% | 0% | 9%  |
| aspartyl-tRNA synthetase                                                                           | <i>Dehalococcoides</i> | DCKB1_41570  | 0 | 0 | 2 | 0%  | 0% | 5%  |
| vacuolar-type H(+)-translocating pyrophosphatase                                                   | <i>Dehalococcoides</i> | DCKB1_42090  | 4 | 0 | 0 | 6%  | 0% | 0%  |
| Acetyl-CoA hydrolase                                                                               | <i>Geobacter</i>       | DCKB1_61160  | 3 | 0 | 0 | 8%  | 0% | 0%  |
| translation elongation factor 2                                                                    | <i>Geobacter</i>       | DCKB1_91560  | 0 | 0 | 2 | 0%  | 0% | 11% |
| protein translocase subunit secF                                                                   | <i>Dehalococcoides</i> | DCKB1_107200 | 0 | 0 | 2 | 0%  | 0% | 8%  |
| Isopropylmalate/homocitrate/citramalate synthases                                                  | <i>Dehalococcoides</i> | DCKB1_109560 | 0 | 0 | 3 | 0%  | 0% | 8%  |
| membrane protease FtsH catalytic subunit                                                           | <i>Dehalococcoides</i> | DCKB1_131180 | 0 | 0 | 2 | 0%  | 0% | 3%  |
| malate dehydrogenase                                                                               | <i>Geobacter</i>       | DCKB1_144110 | 0 | 0 | 2 | 0%  | 0% | 11% |
| Inorganic pyrophosphatase                                                                          | <i>Geobacter</i>       | DCKB1_294670 | 2 | 0 | 0 | 9%  | 0% | 0%  |
| Pyruvate:ferredoxin oxidoreductase and related 2-oxoacid:ferredoxin oxidoreductases, gamma subunit | <i>Acetobacterium</i>  | DCKB1_309350 | 3 | 0 | 0 | 12% | 0% | 0%  |

### Culture: VC-Induced KB-1

| Annotation                                                                          | Putative Organism      | IMG Gene Locus Tag | Peptide Hits |    |    | Coverage |     |      |
|-------------------------------------------------------------------------------------|------------------------|--------------------|--------------|----|----|----------|-----|------|
|                                                                                     |                        |                    | 1            | 2  | 3  | 1        | 2   | DCA3 |
| reductive dehalogenase, KB1_VcrA                                                    | <i>Dehalococcoides</i> | DCKB1_96900        | 28           | 36 | 61 | 39%      | 40% | 47%  |
| chaperonin GroEL                                                                    | <i>Dehalococcoides</i> | DCKB1_11070        | 18           | 14 | 23 | 37%      | 31% | 37%  |
| ATPases with chaperone activity, ATP-binding subunit                                | <i>Dehalococcoides</i> | DCKB1_10910        | 8            | 10 | 9  | 11%      | 12% | 12%  |
| Acyl-CoA synthetase                                                                 | <i>Dehalococcoides</i> | DCKB1_13860        | 9            | 8  | 13 | 12%      | 10% | 16%  |
| chaperone protein DnaK                                                              | <i>Dehalococcoides</i> | DCKB1_174500       | 7            | 8  | 8  | 15%      | 17% | 17%  |
| pyruvate ferredoxin oxidoreductase, alpha subunit                                   | <i>Dehalococcoides</i> | DCKB1_41710        | 8            | 7  | 6  | 22%      | 22% | 19%  |
| Partial sequence of a reductive dehalogenase KB1_BvcA                               | <i>Dehalococcoides</i> | DCKB1_247960       | 4            | 7  | 6  | 18%      | 25% | 23%  |
| LSU ribosomal protein L10P                                                          | <i>Dehalococcoides</i> | DCKB1_105160       | 10           | 6  | 0  | 46%      | 39% | 0%   |
| 2-oxoacid:acceptor oxidoreductase, gamma subunit, pyruvate/2-ketoisovalerate family | <i>Dehalococcoides</i> | DCKB1_41690        | 6            | 5  | 4  | 30%      | 21% | 22%  |
| reductive dehalogenase, KB1_RdhA5                                                   | <i>Dehalococcoides</i> | DCKB1_110110       | 7            | 5  | 3  | 14%      | 13% | 8%   |
| IMP dehydrogenase family protein                                                    | <i>Dehalococcoides</i> | DCKB1_131130       | 3            | 5  | 7  | 13%      | 18% | 23%  |
| phosphoenolpyruvate synthase                                                        | <i>Dehalococcoides</i> | DCKB1_132740       | 8            | 5  | 0  | 11%      | 7%  | 0%   |
| Formate-tetrahydrofolate ligase                                                     | <i>Acetobacterium</i>  | DCKB1_134100       | 0            | 5  | 11 | 0%       | 16% | 31%  |
| D-3-phosphoglycerate dehydrogenase                                                  | <i>Dehalococcoides</i> | DCKB1_40850        | 4            | 4  | 7  | 10%      | 10% | 15%  |
| ABC-type transport system involved in Fe-S cluster assembly, permease component     | <i>Dehalococcoides</i> | DCKB1_106620       | 6            | 4  | 2  | 14%      | 12% | 6%   |
| chorismate synthase                                                                 | <i>Dehalococcoides</i> | DCKB1_131870       | 4            | 4  | 0  | 10%      | 10% | 0%   |
| acetyl-coenzyme A synthetase                                                        | <i>Dehalococcoides</i> | DCKB1_13470        | 4            | 3  | 3  | 8%       | 8%  | 6%   |
| Partial sequence of a reductive dehalogenase KB1_GeobRD                             | <i>Geobacter</i>       | DCKB1_86980        | 3            | 3  | 3  | 13%      | 13% | 8%   |

|                                                                                                    |                        |              |   |   |   |     |     |     |
|----------------------------------------------------------------------------------------------------|------------------------|--------------|---|---|---|-----|-----|-----|
| Partial sequence of a reductive dehalogenase KBI_GeobRD                                            | <i>Geobacter</i>       | DCKB1_87010  | 2 | 3 | 4 | 8%  | 13% | 18% |
| translation elongation factor 2                                                                    | <i>Acetobacterium</i>  | DCKB1_152190 | 4 | 3 | 0 | 11% | 8%  | 0%  |
| Arabinose efflux permease                                                                          | <i>Dehalococcoides</i> | DCKB1_175400 | 3 | 3 | 3 | 6%  | 6%  | 6%  |
| argininosuccinate synthase                                                                         | <i>Dehalococcoides</i> | DCKB1_175820 | 2 | 3 | 7 | 4%  | 8%  | 18% |
| reductive dehalogenase, KBI_TceA                                                                   | <i>Dehalococcoides</i> | DCKB1_14890  | 3 | 2 | 3 | 5%  | 4%  | 5%  |
| threonyl-tRNA synthetase                                                                           | <i>Dehalococcoides</i> | DCKB1_41970  | 4 | 2 | 3 | 10% | 3%  | 8%  |
| translation elongation factor 1A                                                                   | <i>Dehalococcoides</i> | DCKB1_105110 | 3 | 2 | 2 | 10% | 7%  | 7%  |
| Pyruvate:ferredoxin oxidoreductase and related 2-oxoacid:ferredoxin oxidoreductases, gamma subunit | <i>Dehalococcoides</i> | DCKB1_105590 | 0 | 2 | 0 | 0%  | 11% | 0%  |
| indolepyruvate ferredoxin oxidoreductase, alpha subunit                                            | <i>Dehalococcoides</i> | DCKB1_105600 | 4 | 2 | 0 | 8%  | 5%  | 0%  |
| acetolactate synthase, large subunit                                                               | <i>Dehalococcoides</i> | DCKB1_106460 | 0 | 2 | 0 | 0%  | 5%  | 0%  |
| Hydrogenase maturation factor                                                                      | <i>Dehalococcoides</i> | DCKB1_109770 | 0 | 2 | 4 | 0%  | 8%  | 16% |
| reductive dehalogenase, KBI_rdhA1                                                                  | <i>Dehalococcoides</i> | DCKB1_110270 | 3 | 2 | 0 | 7%  | 5%  | 0%  |
| DNA polymerase III, beta subunit                                                                   | <i>Dehalococcoides</i> | DCKB1_114230 | 0 | 2 | 2 | 0%  | 9%  | 9%  |
| hypothetical protein                                                                               | <i>Dehalococcoides</i> | DCKB1_10850  | 2 | 0 | 0 | 3%  | 0%  | 0%  |
| Co-chaperonin GroES                                                                                | <i>Dehalococcoides</i> | DCKB1_11060  | 2 | 0 | 0 | 31% | 0%  | 0%  |
| ABC-type dipeptide transport system, periplasmic component                                         | <i>Dehalococcoides</i> | DCKB1_11630  | 2 | 0 | 0 | 5%  | 0%  | 0%  |
| translation elongation factor 2                                                                    | <i>Dehalococcoides</i> | DCKB1_13440  | 0 | 0 | 2 | 0%  | 0%  | 2%  |
| ATPases with chaperone activity, ATP-binding subunit                                               | <i>Dehalococcoides</i> | DCKB1_23500  | 3 | 0 | 0 | 9%  | 0%  | 0%  |
| transketolase, bacterial and yeast                                                                 | <i>Dehalococcoides</i> | DCKB1_41270  | 0 | 0 | 3 | 0%  | 0%  | 6%  |
| pyruvate ferredoxin oxidoreductase, beta subunit                                                   | <i>Dehalococcoides</i> | DCKB1_41720  | 8 | 0 | 0 | 21% | 0%  | 0%  |
| Acetyl-CoA hydrolase                                                                               | <i>Geobacter</i>       | DCKB1_61160  | 4 | 0 | 0 | 10% | 0%  | 0%  |
| Myo-inositol-1-phosphate synthase                                                                  | <i>Dehalococcoides</i> | DCKB1_105280 | 2 | 0 | 2 | 7%  | 0%  | 6%  |
| hypothetical protein                                                                               | <i>Dehalococcoides</i> | DCKB1_105500 | 2 | 0 | 0 | 13% | 0%  | 0%  |
| Adenylosuccinate lyase                                                                             | <i>Dehalococcoides</i> | DCKB1_106380 | 7 | 0 | 0 | 16% | 0%  | 0%  |
| 3-isopropylmalate dehydrogenase                                                                    | <i>Dehalococcoides</i> | DCKB1_106530 | 0 | 0 | 5 | 0%  | 0%  | 16% |
| hydrogenases, Fe-only                                                                              | <i>Dehalococcoides</i> | DCKB1_108050 | 0 | 0 | 2 | 0%  | 0%  | 4%  |
| hypothetical protein                                                                               | <i>Dehalococcoides</i> | DCKB1_110130 | 2 | 0 | 0 | 10% | 0%  | 0%  |
| Pyruvate:ferredoxin oxidoreductase and related 2-oxoacid:ferredoxin oxidoreductases, alpha subunit | <i>Acetobacterium</i>  | DCKB1_120030 | 3 | 0 | 0 | 9%  | 0%  | 0%  |
| Pyruvate:ferredoxin oxidoreductase and related 2-oxoacid:ferredoxin oxidoreductases, beta subunit  | <i>Acetobacterium</i>  | DCKB1_120620 | 2 | 0 | 0 | 17% | 0%  | 0%  |
| phospho-2-dehydro-3-deoxyheptonate aldolase                                                        | <i>Dehalococcoides</i> | DCKB1_131930 | 2 | 0 | 0 | 6%  | 0%  | 0%  |
| methionine adenosyltransferase                                                                     | <i>Dehalococcoides</i> | DCKB1_132330 | 0 | 0 | 2 | 0%  | 0%  | 6%  |
| 2-oxoglutarate ferredoxin oxidoreductase, beta subunit                                             | <i>Geobacter</i>       | DCKB1_138890 | 2 | 0 | 3 | 9%  | 0%  | 13% |
| 2-oxoglutarate ferredoxin oxidoreductase, alpha subunit                                            | <i>Geobacter</i>       | DCKB1_138900 | 0 | 0 | 2 | 0%  | 0%  | 9%  |
| 2-oxoglutarate ferredoxin oxidoreductase, alpha subunit                                            | <i>Geobacter</i>       | DCKB1_138910 | 0 | 0 | 2 | 0%  | 0%  | 11% |

|                                                                                                    |                       |              |   |   |   |     |    |    |
|----------------------------------------------------------------------------------------------------|-----------------------|--------------|---|---|---|-----|----|----|
| Pyruvate:ferredoxin oxidoreductase and related 2-oxoacid:ferredoxin oxidoreductases, gamma subunit | <i>Acetobacterium</i> | DCKB1_309350 | 4 | 0 | 0 | 20% | 0% | 0% |
|----------------------------------------------------------------------------------------------------|-----------------------|--------------|---|---|---|-----|----|----|

### Culture: KB-1 1,2-DCA subculture

| Annotation                                                                                         | Putative Organism      | IMG Gene Locus Tag | Peptide Hits |    |    | Coverage |     |     |
|----------------------------------------------------------------------------------------------------|------------------------|--------------------|--------------|----|----|----------|-----|-----|
|                                                                                                    |                        |                    | 1            | 2  | 3  | 1        | 2   | 3   |
| chaperonin GroEL                                                                                   | <i>Dehalococcoides</i> | DCKB1_11070        | 50           | 58 | 56 | 55%      | 56% | 61% |
| chaperone protein DnaK                                                                             | <i>Dehalococcoides</i> | DCKB1_174500       | 19           | 19 | 23 | 34%      | 28% | 32% |
| reductive dehalogenase, KB1_VcrA                                                                   | <i>Dehalococcoides</i> | DCKB1_96900        | 8            | 14 | 8  | 24%      | 29% | 25% |
| ATPases with chaperone activity, ATP-binding subunit                                               | <i>Dehalococcoides</i> | DCKB1_10910        | 6            | 12 | 7  | 8%       | 17% | 12% |
| translation elongation factor 2                                                                    | <i>Dehalococcoides</i> | DCKB1_13440        | 6            | 12 | 11 | 11%      | 24% | 21% |
| pyruvate ferredoxin oxidoreductase, beta subunit                                                   | <i>Dehalococcoides</i> | DCKB1_41720        | 9            | 11 | 6  | 27%      | 27% | 19% |
| Formate-tetrahydrofolate ligase                                                                    | <i>Acetobacterium</i>  | DCKB1_134100       | 7            | 11 | 21 | 19%      | 19% | 30% |
| D-3-phosphoglycerate dehydrogenase                                                                 | <i>Dehalococcoides</i> | DCKB1_40850        | 4            | 10 | 12 | 11%      | 19% | 22% |
| ABC-type Fe3+-hydroxamate transport system, periplasmic component                                  | <i>Dehalococcoides</i> | DCKB1_41330        | 9            | 10 | 13 | 17%      | 26% | 25% |
| translation elongation factor 1A                                                                   | <i>Dehalococcoides</i> | DCKB1_105110       | 8            | 10 | 9  | 15%      | 22% | 19% |
| ABC-type transport system involved in Fe-S cluster assembly, permease component                    | <i>Dehalococcoides</i> | DCKB1_106620       | 7            | 9  | 5  | 20%      | 26% | 14% |
| argininosuccinate synthase                                                                         | <i>Dehalococcoides</i> | DCKB1_175820       | 6            | 9  | 15 | 14%      | 20% | 20% |
| acetyl-coenzyme A synthetase                                                                       | <i>Dehalococcoides</i> | DCKB1_13470        | 5            | 8  | 7  | 7%       | 16% | 15% |
| reductive dehalogenase, KB1_TceA                                                                   | <i>Dehalococcoides</i> | DCKB1_14890        | 9            | 8  | 8  | 19%      | 16% | 14% |
| F420-non-reducing hydrogenase subunit A                                                            | <i>Dehalococcoides</i> | DCKB1_40990        | 8            | 8  | 5  | 20%      | 16% | 13% |
| pyruvate ferredoxin oxidoreductase, alpha subunit                                                  | <i>Dehalococcoides</i> | DCKB1_41710        | 6            | 8  | 4  | 15%      | 22% | 10% |
| NADH:ubiquinone oxidoreductase, NADH-binding                                                       | <i>Dehalococcoides</i> | DCKB1_41740        | 7            | 8  | 6  | 16%      | 15% | 9%  |
| L-glutamine synthetase                                                                             | <i>Dehalococcoides</i> | DCKB1_114930       | 3            | 8  | 9  | 8%       | 14% | 17% |
| phospho-2-dehydro-3-deoxyheptonate aldolase                                                        | <i>Dehalococcoides</i> | DCKB1_131930       | 3            | 8  | 7  | 8%       | 17% | 20% |
| Acyl-CoA synthetase                                                                                | <i>Dehalococcoides</i> | DCKB1_13860        | 6            | 7  | 13 | 9%       | 9%  | 19% |
| nicotinate-nucleotide--dimethylbenzimidazole phosphoribosyltransferase                             | <i>Dehalococcoides</i> | DCKB1_41400        | 2            | 6  | 7  | 11%      | 13% | 16% |
| Isopropylmalate/homocitrate/citramalate synthases                                                  | <i>Dehalococcoides</i> | DCKB1_109560       | 2            | 6  | 8  | 6%       | 12% | 19% |
| Pyruvate:ferredoxin oxidoreductase and related 2-oxoacid:ferredoxin oxidoreductases, alpha subunit | <i>Acetobacterium</i>  | DCKB1_120030       | 4            | 6  | 0  | 11%      | 20% | 0%  |
| hypothetical protein                                                                               | <i>Dehalococcoides</i> | DCKB1_10850        | 5            | 5  | 4  | 6%       | 6%  | 6%  |
| cysteine synthase                                                                                  | <i>Dehalococcoides</i> | DCKB1_13970        | 4            | 5  | 3  | 22%      | 22% | 22% |
| 2-oxoacid:acceptor oxidoreductase, gamma subunit, pyruvate/2-ketoisovalerate family                | <i>Dehalococcoides</i> | DCKB1_41690        | 6            | 5  | 4  | 34%      | 34% | 26% |
| Leucyl aminopeptidase                                                                              | <i>Dehalococcoides</i> | DCKB1_105960       | 2            | 5  | 0  | 7%       | 12% | 0%  |

|                                                                                                    |                        |              |   |   |   |     |     |     |
|----------------------------------------------------------------------------------------------------|------------------------|--------------|---|---|---|-----|-----|-----|
| Iron-regulated ABC transporter ATPase subunit SufC                                                 | <i>Dehalococcoides</i> | DCKB1_106630 | 2 | 5 | 0 | 8%  | 16% | 0%  |
| DNA polymerase III, beta subunit                                                                   | <i>Dehalococcoides</i> | DCKB1_114230 | 2 | 5 | 7 | 10% | 13% | 19% |
| IMP cyclohydrolase                                                                                 | <i>Dehalococcoides</i> | DCKB1_10960  | 5 | 4 | 7 | 14% | 10% | 17% |
| hypothetical protein                                                                               | <i>Dehalococcoides</i> | DCKB1_14310  | 0 | 4 | 0 | 0%  | 35% | 0%  |
| glyceraldehyde-3-phosphate dehydrogenase                                                           | <i>Dehalococcoides</i> | DCKB1_40760  | 4 | 4 | 6 | 18% | 19% | 22% |
| LSU ribosomal protein L10P                                                                         | <i>Dehalococcoides</i> | DCKB1_105160 | 2 | 4 | 0 | 19% | 19% | 0%  |
| Myo-inositol-1-phosphate synthase                                                                  | <i>Dehalococcoides</i> | DCKB1_105280 | 9 | 4 | 6 | 26% | 11% | 18% |
| histidinol dehydrogenase                                                                           | <i>Dehalococcoides</i> | DCKB1_106340 | 3 | 4 | 4 | 9%  | 13% | 9%  |
| ATPase components of various ABC-type transport systems, contain duplicated ATPase                 | <i>Dehalococcoides</i> | DCKB1_11590  | 3 | 3 | 0 | 12% | 8%  | 0%  |
| aspartyl-tRNA synthetase                                                                           | <i>Dehalococcoides</i> | DCKB1_41570  | 2 | 3 | 3 | 5%  | 8%  | 6%  |
| threonyl-tRNA synthetase                                                                           | <i>Dehalococcoides</i> | DCKB1_41970  | 0 | 3 | 5 | 0%  | 8%  | 10% |
| Pyruvate:ferredoxin oxidoreductase and related 2-oxoacid:ferredoxin oxidoreductases, gamma subunit | <i>Dehalococcoides</i> | DCKB1_105590 | 0 | 3 | 0 | 0%  | 12% | 0%  |
| histidinol-phosphate aminotransferase                                                              | <i>Dehalococcoides</i> | DCKB1_106350 | 2 | 3 | 0 | 8%  | 13% | 0%  |
| 3-isopropylmalate dehydratase, small subunit                                                       | <i>Dehalococcoides</i> | DCKB1_106520 | 0 | 3 | 4 | 0%  | 18% | 18% |
| 3-Cys thioredoxin peroxidase                                                                       | <i>Dehalococcoides</i> | DCKB1_109870 | 0 | 3 | 3 | 0%  | 11% | 11% |
| Pyruvate:ferredoxin oxidoreductase and related 2-oxoacid:ferredoxin oxidoreductases, beta subunit  | <i>Acetobacterium</i>  | DCKB1_120630 | 3 | 3 | 0 | 16% | 16% | 0%  |
| IMP dehydrogenase family protein                                                                   | <i>Dehalococcoides</i> | DCKB1_131130 | 4 | 3 | 5 | 17% | 6%  | 17% |
| degV family protein                                                                                | <i>Dehalococcoides</i> | DCKB1_131470 | 0 | 3 | 5 | 0%  | 13% | 26% |
| serine hydroxymethyltransferase                                                                    | <i>Dehalococcoides</i> | DCKB1_131610 | 0 | 3 | 3 | 0%  | 10% | 10% |
| translation elongation factor 2                                                                    | <i>Dehalococcoides</i> | DCKB1_131960 | 0 | 3 | 4 | 0%  | 6%  | 7%  |
| Pyruvate:ferredoxin oxidoreductase and related 2-oxoacid:ferredoxin oxidoreductases, gamma subunit | <i>Acetobacterium</i>  | DCKB1_309350 | 0 | 3 | 0 | 0%  | 20% | 0%  |
| ABC-type oligopeptide transport system, periplasmic component                                      | <i>Dehalococcoides</i> | DCKB1_14180  | 0 | 2 | 6 | 0%  | 5%  | 13% |
| transketolase, bacterial and yeast                                                                 | <i>Dehalococcoides</i> | DCKB1_41270  | 0 | 2 | 0 | 0%  | 6%  | 0%  |
| trigger factor                                                                                     | <i>Dehalococcoides</i> | DCKB1_41580  | 0 | 2 | 0 | 0%  | 5%  | 0%  |
| triosephosphate isomerase                                                                          | <i>Dehalococcoides</i> | DCKB1_41880  | 0 | 2 | 4 | 0%  | 10% | 21% |
| hypothetical protein                                                                               | <i>Dehalococcoides</i> | DCKB1_46220  | 3 | 2 | 5 | 16% | 13% | 17% |
| LSU ribosomal protein L12P                                                                         | <i>Dehalococcoides</i> | DCKB1_105170 | 0 | 2 | 0 | 0%  | 20% | 0%  |
| dihydrodipicolinate synthase                                                                       | <i>Dehalococcoides</i> | DCKB1_105340 | 0 | 2 | 3 | 0%  | 11% | 14% |
| Adenylosuccinate lyase                                                                             | <i>Dehalococcoides</i> | DCKB1_106380 | 5 | 2 | 0 | 9%  | 6%  | 0%  |
| 3-isopropylmalate dehydratase, large subunit                                                       | <i>Dehalococcoides</i> | DCKB1_106510 | 0 | 2 | 4 | 0%  | 8%  | 14% |
| ribonucleoside-diphosphate reductase, adenosylcobalamin-dependent                                  | <i>Dehalococcoides</i> | DCKB1_107080 | 3 | 2 | 0 | 4%  | 4%  | 0%  |
| Hydrogenase maturation factor                                                                      | <i>Dehalococcoides</i> | DCKB1_109770 | 3 | 2 | 0 | 9%  | 9%  | 0%  |
| Uncharacterized conserved protein                                                                  | <i>Dehalococcoides</i> | DCKB1_109830 | 0 | 2 | 2 | 0%  | 12% | 13% |
| hypothetical protein                                                                               | <i>Dehalococcoides</i> | DCKB1_110130 | 3 | 2 | 3 | 10% | 10% | 10% |

|                                                                                                   |                               |                     |          |          |          |           |           |           |
|---------------------------------------------------------------------------------------------------|-------------------------------|---------------------|----------|----------|----------|-----------|-----------|-----------|
| Pyruvate:ferredoxin oxidoreductase and related 2-oxoacid:ferredoxin oxidoreductases, beta subunit | <i>Acetobacterium</i>         | DCKB1_120620        | 0        | 2        | 0        | 0%        | 15%       | 0%        |
| protein translocase subunit secA                                                                  | <i>Dehalococcoides</i>        | DCKB1_131590        | 0        | 2        | 0        | 0%        | 3%        | 0%        |
| methionine adenosyltransferase                                                                    | <i>Dehalococcoides</i>        | DCKB1_132330        | 3        | 2        | 2        | 8%        | 8%        | 8%        |
| phosphoenolpyruvate synthase                                                                      | <i>Dehalococcoides</i>        | DCKB1_132740        | 14       | 2        | 2        | 19%       | 3%        | 3%        |
| transcriptional regulator, AsnC family                                                            | <i>Dehalococcoides</i>        | DCKB1_175700        | 2        | 2        | 0        | 29%       | 29%       | 0%        |
| nicotinate-nucleotide pyrophosphorylase                                                           | <i>Dehalococcoides</i>        | DCKB1_10810         | 0        | 0        | 2        | 0%        | 0%        | 9%        |
| DNA-directed DNA polymerase III                                                                   | <i>Dehalococcoides</i>        | DCKB1_11400         | 0        | 0        | 2        | 0%        | 0%        | 3%        |
| carbamoyl-phosphate synthase large subunit                                                        | <i>Dehalococcoides</i>        | DCKB1_13540         | 2        | 0        | 0        | 4%        | 0%        | 0%        |
| endoribonuclease L-PSP                                                                            | <i>Dehalococcoides</i>        | DCKB1_14300         | 2        | 0        | 0        | 22%       | 0%        | 0%        |
| Superoxide dismutase                                                                              | <i>Dehalococcoides</i>        | DCKB1_29830         | 2        | 0        | 0        | 15%       | 0%        | 0%        |
| F420-non-reducing hydrogenase subunit G                                                           | <i>Dehalococcoides</i>        | DCKB1_40980         | 3        | 0        | 3        | 17%       | 0%        | 10%       |
| ABC-type cobalamin/Fe3+-siderophores transport systems, ATPase components                         | <i>Dehalococcoides</i>        | DCKB1_41350         | 4        | 0        | 0        | 20%       | 0%        | 0%        |
| CO dehydrogenase/acetyl-CoA synthase complex, beta subunit                                        | <i>Dehalococcoides</i>        | DCKB1_41490         | 2        | 0        | 2        | 4%        | 0%        | 4%        |
| Uncharacterized metal-binding protein                                                             | <i>Dehalococcoides</i>        | DCKB1_41530         | 2        | 0        | 0        | 6%        | 0%        | 0%        |
| NADH dehydrogenase/NADH:ubiquinone oxidoreductase 75 kD subunit                                   | <i>Dehalococcoides</i>        | DCKB1_41750         | 0        | 0        | 2        | 0%        | 0%        | 16%       |
| glycyl-tRNA synthetase                                                                            | <i>Dehalococcoides</i>        | DCKB1_42310         | 0        | 0        | 2        | 0%        | 0%        | 5%        |
| hypothetical protein                                                                              | <i>Acetobacterium</i>         | DCKB1_43560         | 9        | 0        | 0        | 26%       | 0%        | 0%        |
| Bacterial surface proteins containing Ig-like domains                                             | <i>Acetobacterium</i>         | DCKB1_43570         | 5        | 0        | 0        | 12%       | 0%        | 0%        |
| Isoleucyl-tRNA synthetase                                                                         | <i>Dehalococcoides</i>        | DCKB1_46310         | 0        | 0        | 3        | 0%        | 0%        | 4%        |
| hypothetical protein                                                                              | <i>Desulfosporosinus</i>      | DCKB1_59670         | 2        | 0        | 0        | 13%       | 0%        | 0%        |
| Polyribonucleotide nucleotidyltransferase                                                         | <i>Dehalococcoides</i>        | DCKB1_105370        | 2        | 0        | 0        | 4%        | 0%        | 0%        |
| dihydroxyacid dehydratase                                                                         | <i>Dehalococcoides</i>        | DCKB1_106450        | 0        | 0        | 2        | 0%        | 0%        | 5%        |
| acetolactate synthase, large subunit                                                              | <i>Dehalococcoides</i>        | DCKB1_106460        | 2        | 0        | 0        | 7%        | 0%        | 0%        |
| formate dehydrogenase alpha subunit                                                               | <i>Dehalococcoides</i>        | DCKB1_107840        | 0        | 0        | 2        | 0%        | 0%        | 3%        |
| ATPases with chaperone activity, ATP-binding subunit                                              | <i>Dehalococcoides</i>        | DCKB1_108770        | 0        | 0        | 2        | 0%        | 0%        | 4%        |
| <b>reductive dehalogenase, KB1_RdhA5</b>                                                          | <b><i>Dehalococcoides</i></b> | <b>DCKB1_110110</b> | <b>2</b> | <b>0</b> | <b>0</b> | <b>6%</b> | <b>0%</b> | <b>0%</b> |
| prolyl-tRNA synthetase, family II                                                                 | <i>Dehalococcoides</i>        | DCKB1_130980        | 0        | 0        | 2        | 0%        | 0%        | 5%        |
| uridylate kinase                                                                                  | <i>Dehalococcoides</i>        | DCKB1_131050        | 0        | 0        | 2        | 0%        | 0%        | 12%       |
| phosphoribosylformylglycinamide synthase subunit II                                               | <i>Dehalococcoides</i>        | DCKB1_131090        | 2        | 0        | 0        | 5%        | 0%        | 0%        |
| chorismate synthase                                                                               | <i>Dehalococcoides</i>        | DCKB1_131870        | 3        | 0        | 0        | 8%        | 0%        | 0%        |
| argininosuccinate lyase                                                                           | <i>Dehalococcoides</i>        | DCKB1_175810        | 9        | 0        | 0        | 19%       | 0%        | 0%        |

**TABLE S4.** [Sequences in FASTA format] The custom RDase database (amino acid sequences) used as the reference database for RDase identification from the samples of the KB-1 cultures. The first 36 sequences belong to the RDases identified from KB-1 cultures. The remaining sequences include 117 putative RDases from other *Dehalococcoides* strains and 65 putative RDases from other organisms. The IMG gene locus tag, NCBI gene ID or NCBI GI number is attached to the end of each sequence identifier. For example, the identifier “KB1\_RdhA1 77176848” indicates that the RDase called KB1\_RdhA1 has the NCBI GI number 77176848.



>KB1\_GeobRD 393716494

MDRDRFFKKAALTSVVAGAAV ISSPLKKSARLVLSKEQDEFFPYEISSDFKGMPTNCIFCRIFSDKDAVVDEYVQKTYGLTKIDQMGMVLASSLDGFFVHPEQ  
HGEPGFTAVDKALELAGWATNDEFSPYAQFGRNSLIGTHIVNPNVTKIAKDKPVFVPGFHTWDNSRAEYIEKHGDGRYQFKDKQEATDRIKRACSYLGADL  
VGVTSIERAQKWVYTNWLDLHP IKNTFFPDGTVMKMTYDAMEAQKGNFISAGYVSPDPFRAEAGFEPKSVITLAWAMDYDAMKTAPSLVAGAAAGEGYSRLA  
EISYKVSFTLRRLLGKCAPCNDTACSIPIAIESGMGEGSRMGLLITEKYGPNVRLAKIFTDIELVDPKPRTFVVKDFCKNCKKCADACPAKAI CKDPAQVY  
KVGQETS VGKINKSHLAGVERYVNAERCLGYWAATGTTCTGCLAVCPYNKIDEWHHDLTKIATLTPFKPLRLHDELDFGYGGPLDKTRPKSKWFKDAVADF  
WNKA

>KB1\_RdhA1 77176848

VLAGAGLGASAAISPVFHDVDFMSSPTAEWKRPWVVKNRELEDPTELVDELWLSMYRSDGIWGTQNNPTQDFFLGAEEGAKRRAAAAAYSANAVKTNQSGMT  
LRDRALSSGNMYPITFMGPASSTPESLGVPKWQGTPEENSKMIRAAMIHFAGAAQVGMAEITDRVKTTLVREYDKDTAHKKYIFEDVPKGYEGADKLVFPD  
KVPLYDFAFTHPLNKEMFRTSPSSDIGSAGNSLRYQSFSIQPRIQMFMQVLGYTCYGYTRPFNGAIPITATATLTGLGEGARNNGAFISPEFGPCVGLFSL  
VTDLPLEPTPPIDAGMWRFCQCTCKCADECQAQCSIFEHEPTWDPVKIYKEDTTHIPGRKQFWTDGACVWSYKATIGGCGACMGCTTFNTDIANIHTIVRA  
TLSTTPVFNFLWQADKIFGYGVHEDKEAWWDSQPTLGFDTAHVTVGKDY

>KB1\_RdhA2 DCKB1\_110450

MPNFHSIVSRRDFVAKLGLGTAAATPVFQDLDVDTASPSAEWKRPWVVKNREIDDPTEIDWDMYRSDGRMVQVRSVQIKYLGEEVNRNRNAV  
AKFTADGLKNDTPGLKWINHDEFSPYALGAVMSMLPMAMGMIPSISFMGPATATPEARGVAKYQGTPEANSRMLRSALIFYGAAQVGYGEVTRQYKDKLFRTPDKGN  
AATAYQGAWPPPLTQCKQYFFEDVPVGYDTAEKMFV PANVPLYEFTFIVPMSKEMFRCSPPSALQNAANLSRYTAMAQIQPKIQAFIKSLGYQCYGYTLP  
GAVPTIASAILTGLGEGARNIGAFNNPEFGSITGLFHITDLPLEPTPPIDAGMWRFCQCTCKCADACPSAIPDTHPEPSWDIPKLYGQEDTTHVPGKQFW  
TNSVDCWLGRVQLGTCGACMGCTFNTGKNAIHVYKATLSTTPVFNFLWQADKAFGYGLRAGEDLENWDMWMPQIGGFSTCGIQGGSY

>KB1\_RdhA3 DCKB1\_11560

MPNFHHTISRRNFMKGLGILGTGLTAATAAPVFDLDDIISPKAEWKRPWVVKYREADNPTTEIDWLSMNRWDARQTAQAPGIQAKYLGADEIKKRYANV  
LTKVKATITHTDTPGQTLRDYALSSGAGYFMNLPYVTFMGPQKQVATPQSLVSPVWQGTPEENSRMLRSALIFYGGGQVGFVQIDQKIKDKLVFTNHKGAANS  
IGFVENFPPLPALGKSYLFEDVEYEGATTFVLPNSKQLYEFCTVPMKDMFRANESQIMYSANLSRYRLFGNIQNCIQEYIRSLGYTCYGYASFP  
MGPIASAQNLGTITEGNRNGFTCSPEYGPILGVFLVTDMLPEPTNPI DAGIWRFCQCTCKCADACPVNAIPKDHPEPSWDLPLTEGKETITHS  
ALDCWFLTEYNGCGACMATCTFNTNNAPIHELVRTTLATPLLSFLWQADKFFGYGLTEDKEAWWDL SMPVYGFDSAATS SQGGYNK

>KB1\_RdhA4 DCKB1\_110180

MGNFHSLSRRDFMKGGLAGAGIVAAAAAPVFDLDEVASADSSVKNRPWVWVREVDKPTIEIDWSKTSLLFPQEGCHLPLLLAEFVWDRVNSAMAQGV  
AALNAGAKTGSKEAISLLDTSMQEAAWPHFIAHAGWREPVPYPALEGAAPPELVGQTYTHESFGVPRWESTPEENFALLKSAMRFFGAGQIASIELDANVK  
SMFYVPDASRMFNGPPMAYGFEDCDNGYVTDTHFIIPNKARVWVYTTTTPMKEMRYTAPSGVCYANMSRYRLNQETMACVQKFLGLGYQLSAPWPNG  
ICPSPAVATLSGLGEMDRINQCVIPEEGAVVGIYKFTDLPPLVSKPIDGAFRCHSCRKCADTCPAKAISFEETPEWEPAGPWTGGKKAYKNEPECKL  
YQHSATGATCQICTGVCVFNVTKAMIEIVKSTLSTTGIFNSFLWKADAVAFGYGHDAEAWWDLPLRYGFDTTMGRVDDGGYK

>KB1\_RdhA5 DCKB1\_110110

MSKFHSMVSRDFMKGGLMAGAGIVAAASAPVFDLDELIDELIASDTAVQPRPWVVKERPIDDPTIEVDFSMMERHDGRDQGGQ SARVRIY GADRVLGAAALS  
AAELAERTASNYPGYTYRSRALAGSFKRVSQGTSPGWAETKDPAPVKTPEEREPKWTGTPEEASRMLRAAMRAYGASLVGYTELQEHDRHIFSYEKGDS  
NNEKYGITTPVTAARPVFNENPKAYETTEKLVIPNVPLWEIALSTQGSNELWRSAGTLLGGMANGNTFYNCANLHASTYNFLRYLGYQLIGTIGNDARYN  
GSEGAALMAGLGEASRQKLYTLTPEYGAAPGRLYGVLTDLPLEPTNPI DAGIWRFCQCTCKCADACPVNSISPEGTPDRNWDNACQDWARDI QNGG  
LPLCRQYSNETSHGCRICWGECTFTVNRGALVHQI IKTGTIANIPLFNTYFYKLGDAFGYGTDPKEAEAWWDL SPLTLGQDSTIVAADAGYK

>KB1\_RdhA6 (KB1\_BvcA) 77176863

LGLAGAGI GAATSVMNFHDLDEVISAASAETSLSGKSLNFPWYVKERDFENPTIDIDWSILARN DGYNHQAYWGPVPENGDDKRYPPADQCLTLPEK  
RDLYLAWAKQQGFDMFPGINGHGPTRDEALWFASTTGIGRYRIPGTQMMSTMRLDGSGTGGWGYFNQPPAAVWGGKYPRWEGTPEENTLMMRTVCQFFGYS  
SIGVMPITSNKLLFFEKQIPQFMAGDPGVFGGTGNVQFDVPLKPTVPIVWEEVDKGYNDQKIVIPNKANVLTMTMPLPEDRFKRLSGWLSLASSMIA  
YPQMAFNQGRVQFLLKALGYQLGDDVAMWGPAGAFVMSGLSEGRVANEISPKYSGGTGKSNRLVCDLPMVPTKPIDAGIHKFCETCGICTTVCP  
VGPPQWSNNRWDNTPGYLGRNLNWRGCVLCTNCEAYCPFFNMTNGSLIHNVKSTVAATPVFNNSFRQMEHTFGYGIKDDLNDWNNQSHKPW

>KB1\_RdhA7 77176866

LGLAGAGI GAAAATPVFHDLELMSSSQATLSRPWYIKNREFGDIGIELDNLIKRRDLRQYDNFTMKHLFPQYGGPPAFMQGMSAAQKNSDRKELWP  
DYKASTRDLALANALGSVGTFGTYALNTTQGGWKVDPAPTPEELGIPKWEPTPEENLMMIRAAFSVMGLGPMVGVSELNEKTKNLVYEYTGDSWTWLPQGGP  
SEHIFDDNISEFYRTQNPNTLHIPS SHKYVISTHNLSLDELTRRTYSP LGTPAEAISYSRVAIAKNFVEEFIRGLGYHVYGHALQPALVWDFLSGVAEHS  
RMGQNAVSPYEGMRAHATFYTDLPLAFNTPDAGLTKFCETCGICADACPVGSI SPVGTDRNWDNACQDWARDI QNGGTEMYNI PGYKGRNCTFSCM  
TTKAACGAACKFSCFPNALRIGSFMSHIVKATVSNSTLNFNGFFRMEETLKGYMAKPESSWETPEAWVYGTNPNSLRQ

>KB1\_RdhA8 DCKB1\_11540

MSNFHSTLSRRDFMKSGLGVGAGLTMSAAAPVFDLDEVTS SAIGINKNPWVVKERDFKNPTVPMWPKITRHA GTFKTLRPTVADFTKAGVVGSTDL  
ETPEMALTYLDAMVKEFPGWTPGYAGMGDVRTTSLCNASKFMMGAWPKNMMEGGKRINVOAAIMAGGSPFTFPWLGQDPTTTRPQDFGAPVWQGTPEEN  
LKTCSRSAIRFFGGSDVALELDDDDILKFFHSHKIGGKDLVVEDVEEAYETTKMVIPRCKWVLMWSARQSLEGTRRQAGITENYAVWYSYRSLPKVGVQIQE  
FIRGLGYQALNPGMKGYLTSPLAAFSGMGEHGRMSSPTITPKYGVNTRAMWAMI TDLP LLPTPPIDFGAYKFKCTCGICADACPFGLIQGDPWENPASAK  
SGIQGTFEGWRTNTADCPHCPTCQGTCPFNKSPDSFLHAVVKGTVANTPLLSNFFTNMEKAMYGRKDPEEWDMDDFTYGIDTSY

>KB1\_RdhA9 DCKB1\_110210

MKEFHSTLSRRDFMKSGLGVGAGLTMSAAAPVFDLDEVTSSTLGINKNPWVVKERDFKNPTVPI DWSKVTRQPGVFOGLRPTVADFTKAGVVGSTDL  
ETPEMALTYLDAMVKEFPGWTPGYAGMGDVRTTSLCNASKFMMGAWPKNMMEGGKRINVOAAIMAGGSPFTFPWLGQDPTTTRPQDFGAPVWQGTPEEN  
LKTCSRSAIRFFGGSDVGAIEIDDDVLKFIHSQIGGKAVVVEDVEEAYETTKMVIPRCKWVLMWSARQSLEATRQAGITESHAVWYSYRSLPKVGVQIQE  
FIRGLGYQALNPGMKGYLTSPLAAFSGMGEHGRMSSPTITPKYGVNTRAMWAMI TDLP LLPTPPIDFGAYKFKCTCGICADACPFGLIQGDPWENPASAK  
SGIQGTFEGWRTNTADCPHCPTCQGTCPFNKSPDSFLHAVVKGTVANTPLLSNFFTNMEKAMYGRKDPEEWDMDDFTYGIDTSY

>KB1\_RdhA10 DCKB1\_110480

MIRRYQVTFHSTLSRRDFMKGGLAGAGVAVSAAAPVFDLDEL TASSGGVQKLPWVVKERDFKDPVPI DWNQNLPKMEGTFFPYQARPTLSAQERYAMGI  
PGGSSGTWASPEQAQVLFDMKKEFPGWEPGYAGLGNRTTALFMATKFMRMGMWPEINMGGNRVNVMQAILKAGGTATFPSPFMGLRSSETLTPQDFGAPV  
WEGTPEENLTLRQVVRFLGGCDVGAQEMDSVDFKLFHEQSGGKQLVIENVDEAAETPKLVI PAKAKYILQWTRQPYESTRRQAGEYEDA AVYYSYRQFP  
FVGAI IQEPIHALGYTAVSTHMMGYHTNAIATLTGMGEHGRMSSPTITPKYGVNTRAMWAMI TDLP LLPTPPIDFGAYKFKCTCGICADACPFGLIQGDP  
WEATRPGTRPFGNWRNTTTCTPHCPVCQGCSPFNTNGDGSFIHDLVRNVTVSTPVFNNSFPANMEKTMGYGRKDPRDWNIDDYTYGINTSY

>KB1\_RdhA11 77176878

LGLVGAGVGAAGANPVFHDIDEIASXSSSLQHNPWVVKDVOPTTPI DWDVLKPGRVAYVGTGMFGMGPDLVKYSRAETQKLMINYLKSEDPNWPQGANL  
LGVKSASTDEYPDFAGDIKDNALATGSALLTAGVFPMEVIMATGGKYFSLTDHPEGWREVPYITQRGGTKWQGSPEALKVVRAAARFVGFDDVQAI PVDE  
KFLKVMWGTKQMIISNAPTFEFGVDVDFVCTPAVNPTNITIPNKCKWYLNFTCXQPEVTRHAQSTTQNAQTYSYANWIKTFKHVQDFLWGLGYISLDNI

HGRF IPTGFTGTCMCGAGELSRWSGILTPKYXMTFRVHVHGLTDLPLAETSPVDFGARKFCETCGICADSCPOGAIQQGEATWDARYAWENSGXLGWRNDLTL  
CNHCPCVQCQVPCFNAPFKSGXHEIKSTISTTSLFNFGFRSMKDTFHYGRKPAEAWEDDPNQPVVWGXDTPV

>KB1\_RdhA12 DCKB1\_110630

MSQFHSSTLSRRDFMKGGLIGLAGVGAATAVSPVFRDLDEMASAPSARINMPWVVKQVDEPTTPIDWNVLP TLGTACDDNNGVVPNIRTRAEYQKVM LDYTMK  
QYPDWKGP TLTVGPSPDLNYPDYVGD IKDNALCVGATLCNAGLFPTEVIQATGGKYTTIQDRPQGWRCVKPVEQRGGTKWQGTPEEALKVVRAAARFYG  
FDDVTAIPVDDKFLKVMWQKRMLRMATPTKFEFGD VDFVCTPEIQPM SKI VIPKRVKWF LQFSSRQLGEVTKHGVGTCQNAQQLYTYVNWIRTVKTIQEF  
LWGLGYISLDNINGRFAPT GATGIMAGAGELARWGA VMTPKYIMVRVMHGVLTDLPLEQSSPINFGGREFCKTCGICAEACPMDAIQKGEPSWEVNHKWDN  
PGYLHWRNDRSKCGHCPVCQVPCFNAMDKSF IHELKGTVSTTPIFN SFFTGMDKNFN YGRKPPAEWWESEQPVGGFDSSV

>KB1\_RdhA13 DCKB1\_110540

MLNFHSTLTKRDFLKG IGLAGAGLGAASAVTPMFHDLDELVA STPSTRNLPWFVKEREHGDPTTPIDWSMIQRRPYTWARMDPSLPVYDNLKAI GAPVTRWL  
DWADKKAED EILFAKAREEFPGEFPGIDGFDLRTTAL THASEMFAFGQFPQKMN LGGNMVDLVP A IRAAGGYL GSTDSYAGPKI VHTPEEMGGTKYQGTPE  
DNLRTLKAGIRYFGGEDVGALELDDNLKLI FTVDQYKTFLEFGDVEECVETPRQVI I PNCKYIFLW TMRQPYEWTRRQSRGFEGAATETSYERAYNTKAH  
FQDFARGLGYQMSAGNNSLSPAGAWAVLGGELGELS RASYVNHPLYGITLRV TWGFLTDMLP PPSRPIDFGARKFCETCGICAEACPFGA INPGEPTWKDDN  
AFGNAGFLGWRCDYTKCPHCPI CQCTCFNSHPGSFI HDIVKGTVSTTPIFN SFFFKNMEKSFKYGRKNPATWWDEVDDYYPYGVDTSY

>KB1\_RdhA14 (KB1\_VcrA) DCKB1\_96900

MSKFHKTISRDRFMKGLG LAGGGI GAAVAAMPVFDLDEFVSSEANSTKDQPVYVKHREHFDPTITVDWIDFDRYDGYQHKGVYEGPPDAPFTSWGNRLQMR  
MSDEEQKRLIAAKKERFPGWGGHGRGDQRADALFYAVTQFPFGSGEEHGLFQPYDPQPKFYARWGLYGP PHDSAPPDGSVPKWEPTPEDNFLMLRAA  
AKYFGAGGVGALNLADPKCKL IYKKAQPMALGKGTYSEI GPGMIDAKFYPKVPDHAVPINFKEADYSYNDAEWV IPTKCESIF TFLPQPQLNKRTGG  
IAGAGPYTVYKDFARVGTLVQMF IKNLGYHALYWP IGWGPGGCF TTFDQGEQGRTGAAIHWKLGSSQRGSERVVTDLP IAPTPPIDAGMFEFCKTCYICRD  
VCVSGGVHQEDEPTWDSGNWVNVQGYLGYRTDWSGCHNQCQCQSSCPFTYLGLENASLVHKIVKGVVANTTVFN SFFTNMEKALGYGDLTMENSNWWEKEG  
PIYGFDPGT

>KB1\_RdhA22 393716494

MAQFHSVLSRRDFMKG LAGAGVGAATAVSPVFRDLDEMASAPSARVNMWVVKQVNETTTPIDWDVLP TLGPAYKGGPPMGLITPAYPESEIHRMKMDRI  
LEKYPNWEKAGSLTGFPGTSLADPEYDYVGD IKDNALVMGALLNMGMFKELIMATHGAYMGLTDHPGEWRIMPAVEQRGGTKWQGTPEEALKIVRAAVRF  
YGFDDVTAIPVDDHFLKVMYGEKWLITHGAPTTFEFGD VDDIVCTPAIRPTKIVLPRRMKWF LQFSSRQPGEVTRHALGTTQNAQQA YYYTSWIKIVKSIQD  
FLWGLGYISLDN CNGRFAPT GATGILAGAGELARWGGVMTPKYGISVRVMHGVLTDLPLEECKPIDFGGRKFCETCGICADACPMGAI SKDEPTWDAAKPYQ  
YGGY

>KB1\_Rdh DCKB1\_13760

MAEVNRRDFLKAAGVGAAGL SVAAGSYWNSYHEGQS AFSMQQEHROGHEYNREPFRVDKVT PFSWEVIGPDL PDNHSVGGIHRIDMRWYGERFKSAGH  
AVAGSNP AVGYDLTKGDLDCMPTWPSNGLAGLSTFYQKYDLYPMMVDVDEKEYKYDWLPQLVERFKASIDSRASFNANEGLIAMARSEAQRAVPVSSITTP  
PEENDWSGVSARRAVFESPELASQLIKRMAADL GATFVGVTPLNKGWVAYSHAPLGGGGTGGRGFGLNTPIKIPEWWDNAILVTGMSWDVNAGDPNYGD  
SWTYNIISSQIAQQMVFLKYLGYPARWHSFPFGYDFVPGAIAECCMGIEGRTSNCLAPDFGGNVRPAVITTS LPLAADKPVDFNLAEPFCSRCKLCAQVCP  
TQAISYADQPDFE IYGLRRFC TNLAKCRDGNL GAGPMGCRACISVCPWT KKNWVHRFVREVL SHDATGTSQNVAIWAERTLYPKNYADDLNPNYKGVYE  
PPKWITTNEYVSSVFNTPMGVK

>KB1\_TceA DCKB1\_14890

MKRLGAGAGAGALGAAVLAENNL PHEFKD VDDLLSAGKALEGDHANKVNNPWWVTRDHDPTCNIDWSLIKRYSGWNNQAGAYFLPEDYLSPTYTGRRH  
IVDSSLEIKLQGGKYRDSAWIKSGIDWMKENIDPDYDPGELGYGDRREDALIYAATNGSHNCWENPLYGRYEGSRPYLSMR TMNGINGLHEFGHADIKTNY  
PKWGTPEENLLIMRTAARYFGASSVGAIKITDNVKKI FYTKAQPFILGPWYTTINMAEYIEYPPVDNYAIP I VFDVDPADQGHY SYKRFGGDDKI VVPNA  
LENIFTYTIMLPEKRFKYAHSVPMPCSC IAYPLFSEAEARIQQF IAGLGYNSMGGVEAWGPGGAFGNLSGLGEQSRVSS TIEPRYGSNTKGSRLMLTDL  
LAPTKPIDAGIREFCCTCGICAEHCPTQAISHEGPRYD SPHWDCVSGYEGWHLDYHKCINCTICEAVCPFTMSNNNSVWVHNLVKSTVATTPVFNFGFFKNMEE  
AFGYGPRYSRDEWASENPIRGASVDIF

>KB1\_Rdh DCKB1\_37290

MKGLGLASAGIGAAAATTPVFDLDDLMSPPQAVMSRAWYVKNREFGDIGIELDWNLIKRRDLKEFDNWRKYIPQHYPGGPTAFNAHLISNTEKVADKTK  
LWPDYQASTRDIALGKALFAVGNSSIYASNC EMGGMVVPQTPEQLGIPKWEGTPEENLRMIKAAF SVVGLGPSVGAELTEKKNFIWEYSP ISTFGPSV  
PSRHIVFDNINSEYTTSDS IHPGSHKYVITTHNMACDEL MRRPYSGMGGAERISYSRVAFAKNFVEEFIRALGYHVYGHALQPATVWVILGGEHGR  
MGQVLSPEY GALMRTSIF YTDLPLSFTPPVDAGITKFCCTCGM CADMCPVGAIPKVG TGRSWSDF TGGQD WANDKQLGGNEVMYNI PGYKGWRSNLFECF  
TPCGSACKSSCPNTIPDGSFMHNVKTTVSTTFLN SFFRSMENMRYGLDKEPSSWWDNPKWEHIYGTHPNLLEQ

>KB1\_Rdh DCKB1\_107470

MQGFHSALSRRDFMKG IGLTGAGFGIAAATAPVFRDLDEGASTAANTYKKNPWWVKNERNYCDPTTPIDWDVWKAFDATHYD IGGQYSDEYLAQIGIPSVLN  
ESVAKRHERITSLR LKPGYSMDWAF CQGAKNVTSSMCYNEFGQGRSMLGDKKMMDEVMTP EQI GLAKYEGTPEYNALMLKSAIRFFGGTDIRCLPVDKKT  
KRVLNVGENQHPDQPYVWEDGISWPYETRTKRAIPNQG AHILVFSYNGSYDGTVRSPSWISNGVAFNQCLSGDAIQLYLQRFVKG LGYLWVGGDDFPGIAS  
PGAGALSGFGEI GRIGHAVGWKWMRCTR LMI TNLPLPADNPIDFGVVSFCTTSCCKCAEF CPVSAIKMDQEPSWELATDPSNPKPQNFNNPRKTFWYLN  
QAGCFSNWCLTDTF CGICMGCEVFNK LADSSIHEIVKPIANTLLDGF FNMDFKAFGYGCLPEDK WEDWWTGEMKPIHGI

>KB1\_Rdh DCKB1\_107520

MNKFHSSVSRDRFMKGLG IAGAGLGA AAAAVPVFDLDEAVSAPVAGGFRPWWV KEREYEDPTCEVDWSQIERSDNSWIMHGVRNGVKGGLYFAGQKYLW  
QKEGSDQAFNGVKNNEPGLTLRDMALEGGASPLL MGLNKVNFVLEPIDQDQVLAQFGFTA AAWPNASSFWVASAPPDFWGVPKWQGTPEENSRLRSAMRF  
FGASEVRFAELNEKTKLIFTHHVHNTPIVFDV DKA YEAVAGQK FVLPDKPLYIVSVAVQMSKEMYRQGNAGIRFAANNMRYRLNNVVQVATQSLFKGIGYQ  
GIGYPSESLFHGMMPQADAILTGF AEMARNNNY CISPEFGTVAGYYSILTDLPLAPDKPIDAGYFRFCHTCRCKAEACPSQAISFDSEPTWDIPSSVDP  
KATLYSTPGKKV FHTDSPACYSRWI GLHGCA RCMGTCVFN TSSAMVHDMVRATIGTTGLFNGFLWNADKAFGYGLIPPEKWEWWDKDYVPLGQDSTIGSY  
YGGY

>KB1\_Rdh DCKB1\_107910

MDEKINRRDFVKGAGLASAATVATLMATASTVSAEELVNPGGKAMDEMGNASIKRDLPE SFYKRIENKAGYIGTTRVVAPTQRLDAREHGF SQIVRRGSTGD  
WSGEPGDWGPILLAAVQEKKHA AEISPLEAADY TWSNAFQIAMD RWHITLEPGRYQQAPIAATKVELSPEEMTARIKKICRWFGEQVGI CEVTEDMKPF  
YSVGRTRGTYTTGHAVGNDGREIWPY PKYKICVMADKCDTDLNALDGPLVEASAKIACQSDFAPHYLES IIRSLGHDAKANILFSDTDIMDTPFAVKAG  
LGELGRSLVISPWGAQMRIMEVFTNLPLVPDKPIDFGLQBFCKVCKKCADNCPASAI SMDEPSEVDTVVKSI RWFQDGKCLAQRLAYGCSKCGVCPWS  
KPDTLIHEVGRMVGNPAFAPFLVKLDDFFYNYRYPEGHATGEWAPWR

>KB1\_Rdh DCKB1\_110270

MSRFHSMVSRDRFMKAVGLAGAGLGA SAAISPVFHDVDFMSSPTAEWKRPWYVKNRELEDPTELDWLSLMYRSDGIW TQNNPTQDFFLGAE EGAKRRAA  
AAYSANAVKTNQSGM TLRDRALSSGNYMYPITFMGPTSSSTTPESLGVPKQGTPEENSKMIRAAMIHF GAAQVGM AEITDRVKT KL VREYDKDTAHKKYMF  
DVPKGYEGTDKLVFPDKVPLDYFAFTHPLNKEMFRSSPSSDIGSAGNSLRSYQFSIIQPRIQMFQVLGYTCYGYTRFNGAIPTIATATLTGLGEGARNNG  
AFISPEFGPCVGLFSLVTDLPLEPTPI DAGMWRFCQCTCKCADECPAQCSIFEHEPTWDVPKIYKEDTTHIPGRKQFWTDG IACWSYKATIGGCGACMGT

CTFNFDIANIHTIVRATLSTTPVFNLSFLWQADKFFGYGVHEDKEAWWDMSQPTLGFDTAHTVTVGKDY  
>Kb1\_Rdh DCKB1\_110480  
VKTFHSTLSRRDFMKALGLAGAGVAVSAAAPVFHVDDELTAASSGGVQKLPWWVKEREFKDPSPV IDWQNLPKMEGTFPYQARPTLSAQERYAMGIPGGSSG  
TWASPEQAQVFLFDYMKKEFPWPWEPEYAGLDNRRTALFMAFKFMRMGMWPEINMGNRNVVMQAILKAGGTATFPSPMGLRSSEFLRQDFGVPWRWEGTPE  
ENLLTLRQVVRFLGGCDVGAQEMDSVFLKLFHEQSGGKQLV IENVEAAETPTKLVIPAKAKYILQWTRARQPYESTRROAGEYEDA VYYSYQRFPFVGAI I  
QEFIALGYTAVSTHMMGYHTNAIATLTGMGEHRMSSPTLVPKYGTTRNAMVMMTDMPLMSTKPIDFGVYDFCKTCGICADSCFPGLIEKGDPSWEATQP  
GTRPGFNGWRTNTTTPCHPCVQCGSPFNTNGDGSF IHDLVRNTVSVTPVFNSSFANMEKTMGYGRKDRDWWNIDDDTYGINTSY  
>Kb1\_Rdh DCKB1\_110600  
MAQFHSVLSRRDFMKGLGLAGAGVAAAAVSPVFRDLEMASAPSARVNMPPWVVKQVNETTTPIDWDVLPPLGPAKGPMPMGLITPAYPESEIHRMKMDRI  
LEKYPNWEKGASTLGFPGTSADPEYDYVGDIDKNALVMGAALLNMGMPFKELIMATHGAYMGLTDHPEGWRIMPAVEQRGGTKWQGTPEEALKIVRAAVRF  
YGFDDVTAIPVDDHFLKVMYGEKWLITHGAPTFEFGDVEDIVCTPAIRPTKIVLPRRMKWFLOFSSRQPEVTRHALGTTQAGQAYYYTTSWIKIVKSIQD  
FLWGLGYISLDNCGRFPAPTATGTLGAGELARWGVMTPKYGISVRVMHGVLTDLPLEECKPIDFGGRKFCETCGICADACPMGAISKDEPTWDAAPKYQ  
YGGYLTWRDMDAVCSHCPCVCGTCTPFNAFDKSGVHELKGTVANTSIFNGFFTSMDSKSFYGRKPEEWWNSEQPVGTIDTST  
>Kb1\_Rdh DCKB1\_114830  
MIKKHSTVSRDRFMKGLGLAGAGIAAAAVTPVFDLDELMSSSQATLSRPWYIKNREFGDIGIELDWNLIKRRDLRQYDNFTMKYLPFYQPGGPPAFMQGM  
ESAAQKNSDRLLKELVRLKASRDALANALGSVGTFGTYALNTTQGGWKVDPAPTPEELGIPKWEGETPEENLMMIRAAFSVMGLGPMVGVSELNEKTKNFV  
YEYTGDSWTLWLPQGPSEHIIFDDNISEFYRTQNPNTLHIPPSSHKYVISTHNLSDDELTRRTYSPLGTPAEAISYSRVAIAKNFVEEFIRGLGYHVYGHAL  
QPALVWDFLSGVAEHSRMQNAVSPEYGGMMRAHATFYTDLPLAFATNPDTAGLTKFCETCGICADACPVGSI SPVGTDRNWDNACQDWDANDIQNGGAETMY  
NIPGYKGRWCNTFSCMTTKAACGAACKFCSPFNALRNGSFMHSIVKATVSNSTSLFNGFFRNMEETLKYGYMAKEPSSWWETPEAWYVYGTNPNSLRQ  
>Kb1\_Rdh DCKB1\_114860  
MKGLGLTGVTLGSASALSPOFRDLDELANSKAVVNRKRWVVKERYDGNPTIEIDWNLMKRRDLRGSFNWDYASLMMAFPGGPPAFKANTPKQAAAVTAKAKE  
IWPDYAGPTIRDKALSSSFWASAYGHSYCRSQNHGMPTIEIPAPRPSAINTPAWEGTPEENAAMLRAVFLVGLGPIVIGTMTLDEKSNQFIWEYSVGSWTG  
DESVPKGNHIVLDSGITESYVDATSFHIPTSQKYVIATHNISCDGFLCRSMAGAGFSSTEEMSVYRVAYAKSIVEQFIRGLGYNVTYGHDLQSAVADWMSWG  
VGEHCRMGQVIGSPYEGSLLRTHAVFYTDLPLVPTNIDAGVFCETCGICAEATCPVGAIQERGLDRSDDNCCQSWADDKQAGGSKVMYNIIPGYKGRWCN  
LFSCAFTPCASACKSNCFNAIGDGSFVHSIVKSTVATSPIFNSFFTSMGVLHYGKQDKDPASWNSPDEWF IYGTHPNLLRQ  
>Kb1\_Rdh DCKB1\_114910  
MKGLGLAGAGLGAVAASAPVFHVDDELTSLSGNSVNRYPWYVKEREFKNPVEIDWNVLSRQANNFKSHAKPTPADYDAAGVVGRYMYDLETPAEALILYDY  
CEKEFPGWDKWGGSGDVRTTALDNACKFMMGMWPGDMYQGGKRINVRNAIIAAGGTGSYSSFLGPOCFSIRPQDVGASRWQGTPEENYKTVRNRFRFLGA  
QDVGCAEIDSSTVKFFHRAKGASGMFAGQGDAGGKQVAFKIDVVPYETGDEYAIIPNKCKYIITFTARQSFEGTRRQAGITEGFAVWYSYARYIKMMCHMQE  
FIRGLGYDCLNMSGCLCFSNPLSAITGLGEHGRMSSPTIHPKNGTTRNANGWALLTDLPLVAPATNPIDFGAYKFCETCGICADACPFGLIQRGESTWENPAAK  
NGLAQGQFKGWRNTNDCPHCTCQGTCPFNSTSQSFIHDMVKATTTNLPFMNGFFANMERFMEYGRKPQWFEWDFIEQPTYGFDTTA  
>Kb1\_Rdh DCKB1\_115000  
MEGVMVKSHTLNRDRFMKALGFVAGVAGALSAGSPVFKDLDEMAGASSNKRWWIKEDVTPTEIDWDMKRRHDATTPQVAYASVFGKDVAAQGAQKQ  
ADRQWIAEDKSGYTLRDYALFDAAAYGWQAGFSDHLDGDTTVPYGMGSPDLGLPANGWSPETTAMIRQAFRFLGTGTISIVELNENNRKLVYGVVDWG  
KAIVFENVEKAYETDKKRVIPEKCRYAVVFSMPMSEEMNKRAPTLLGDATTALSYSLSLTLFQIRAQRFFRMLGYOGLGSFTYVNNNTSINPALAVISGMGEQV  
RLGCQVPEYGTMARLGSVITDLPVDPKPIDSGVWNFCCKTKLCAHCPSGALNPDVDPVSDVVKYSGNHPGKVVYHCDGMNCRGYWYDLTSLCSICVASCV  
FAKKNKAGIHDIIKATTAVTPAFNSFFRTMDQAFGYKYSNRDPESWWDINGEPMFGIDRSY  
>Kb1\_Rdh DCKB1\_115020  
MKAIGMAGAGVGAVAATTPVFDLDELMSSSSVTPAKRPWWVKERELFNPTSEIDWDMQRDRKNEAHSRIATMYRSVETIDAAAVTQKKIDADRIAKQT  
PGFDTKYQALKAGYSSTESPAWAYPGI VDEADWAKTPEELGMPKWSGTPEENSRLLYAALRYYGAMF IGYAEVEDKWRNKLKFKVKTDDAVRNTWTQNPD  
PPESDELRYVYENVDQPYSELRKSTGRSAGKHVIPSCKPLWLTITATGACMEATKTLDDSTISKSNSSTADNGHEALKVRTTFNFVRALGGWRAGDGGHQSTSE  
SNFSAAMLLTGLAENSQGNCLTPTETGPNHIFPTMLTDFPLVPTKPIDAGLFRFCCHSKKCADACPSQSI SHADEPSWDVDPDVGKPRVFCNPGHKGFWD  
MAGCNYYSKGGTSGCWVYANCFTFSEDKAAMMHNIRGTVSTTSLFNGFFSSMSNTFGYGPYESPEVWDMSLPAYGFDSTIGAAKGGYSK  
>Kb1\_Rdh DCKB1\_115090  
MKGLGLTGAIGLTAGAAPVFHDMDELLTSSGTINKRPWWVKEREFKDATTPIDWPSVERRYFWAYPMTAHQEAILEGTMKPEDLPYEVQRILTREELEAR  
NKVVIDYCKNEFPGWEPGDFGDRVNTSLAQVSEFFGFTRFPRRLQTNQKVINLAKLVS DAGGDRIDGFLPPLYEGVKTPEEMGVAKWQGTPEENLMTLR  
SVARLFGAEDVGCVEVEDEDIKMKVFEADMGGKYYFEDVDEAYETATKRVIPNKCKWVFTWTRMROPNNMTRHQAGRKENAPTYITYMRGHYLSYIKDFTRG  
LGYTMVAGGTTGICVGGATGGAALSGLGELGRASYIIPKYLGNRAMMHTDFPPIVPTRPIDFGSRFCMTCCKICSTACPFGAIKTGDPTWEDDTIYGN  
PGFLGWRCNYDLCPHCPICQGTCPFNTRDDKSF IHELVRLSASHTTVFNSSFQMDLNFYDGRKQDRDWWKEEDFPFGIDTSTY  
>Kb1\_Rdh DCKB1\_115150  
MSKFHVVNRREFMKGLGLTASLSAIGATSPLFHDLEVMSSDTARTKQPWWVKEVDKPTVEIDFKLTERYDQISRLIYYNQPKYVDPAEIADLTQKQDN  
FKKMAAGDPQDIKGLALCEGVFGWSSHGDFPEYFLGDFPAKTPEEWGISKWQGTPEENSRVITAAAKLFGACITGFAQIQNEDFKKYFFIRGRDFEGP  
VIDDPSDARLGKSRPNMLVSSGGGFSLVPAQY SFGTSASP IRELVFEDVDKPYSTDSKVIPNSFKSVIMAVPQDPYLRGLGPSAVPGDGRITGFAATGQ  
SYGFLSIVQRRFKFMKTLGYSCLGGGTGGLAPVTSWGVVSGLGEMNRMNPLIPEWGTMIIRSTIIFVSDIPIVPTKPIDAGMFRFCHTCKRCAEACPYQAI  
SLENEPTWEAHNAAANCSGAKFFLKAENCMKHLRVMGKDWLGCDCNMCSSCPFEGGSTSIFAHVVKSTLATTPVDFDSFFYNMKSFGYGHFADPEEWHGDHA  
VGGPINTVGRWHDSTW  
>Kb1\_Rdh DCKB1\_115210  
MKALGLAGAGGVGLGTSPVFDLDELASSGNDIQKHPWYKEREYGDSTTPIDWPNVHRYDRTRPLRSTFADEEERKVLIEYAQKEDPGWDGPEGIGDM  
RTTALGVGAGMFAFGVMIHDDGKTSNLNLTLLGRPSVILPHGETPRWEGTPEDNLKLRAAVRFYGGSEVGAIDL DENTKLIWEKTPGETCIGTAASMGQI  
LDGVTGPLLVYEDVDQSYMADDKLVISNKCKWVLTWTFRQPEDMVRMGGVTEAAVVISYSRIAI IELRIQAFRLTLGYOGLGGGTGEGWSPGGFATLTG  
LGELGRASYIITPKYGISVGRMNRMLTDFPLAPTKPIDAGMRKFCYTCGICVDACPFGAITGDPSEFEGYKPMWNNYEAWRVNYENCTHCPVCGTCTPFNE  
LGGSMHLGIIKGTVATTPVFNSSFRRNMHKVFDYGRKPTRDWWDLNQPWEGFDSTR  
>Kb1\_Rdh (partial) DCKB1\_297220  
PDIFFEEAPKPSFNASANKV IIPDTGIYAVVHTVRQSLDTSRVRGYSLSDGAGQAYDNCDIAQWRLQAFKLVLYGYSVSNQIQNGNPIVGVGVMSSGLGEQGR  
LAHLITPGWGPRIQSTMNIVNLPVAPKPIDFGARKFCITCKKCADLCPGALSKEKTLTWDIVQAYDSVKPNLNNPGLNPPDFHFKCNRYWNESDITYC  
GVCQAVCFSKDDASSVHEIVKATLAQTCLIAFL  
>Kb1\_Rdh (partial) DCKB1\_319470  
YETTTKMIIPRCKWILMWSARQSLEATRQAGITESHAVWYSYRFPKVGAFQEFIRGLGYQALNPGMMGLANPLAALAGMGEHGRMSSPTITPKYGT  
NRAMWALITDLPPLTPPIDFGAYKFCCTCGICADACPFGLIQKGDPTWENPASAKSGIQGTGFEGRWNTADCPHCTCQGTCPFNNSKPDSPFLHAVVKGTV  
ANTPLLNSFFTNMEKAMDYGRKDPEEWDMDDFTYGIDTSTY  
>Kb1\_Rdh (partial) DCKB1\_114790

AAARFYGFDDVQAI PVDEKFLKVMWGTKQMI ISNAPTFEFGD VDFVCTPAVNPTNITIPNKCKWYVNFTRQPGEVTRHAQSTTQNAAQTSYANWIKTF  
KHVQDFLWGLGY ISLDNIHGFR IPTGFTGTICGAGELSRWSGILP PKYGNMTRVVHGVLTDLPLAETS PVDFGARKFCETCGICADSCPGAIQQGEATWDA  
RYAWENSGYLGRNDRDLTLCNHCPCVQGVCFNFAFDKSGIHEI IKSTISTSLFNGFFRSMDKTFHYGRKPAAEWWD DPNQPVWGMDDTTV  
>DET0079\_tceA 3229017  
MSEKXHSVTTRRDFMKRLGLAGAGALGA AVLAENNLPEHFKD VDDL SAGKALEGDHANKVNNHPWVVTTRDHEDPTCNIDWSLIKRYSGWNNQ GAYFLP  
EDYLSPTYTGRRTI VDSKLEIELQKKYRDSAFIKSGIDW MKENIDDPYDPELGYGDRREDAL IYAATNGSHNCWENPLYGRYEGSRPYLSMRTMNGING  
LHEFGHADIKT TNPYKWEPTPEENLLIMRTAARYFGASSVGAIKITDNVKKIF YAKVQPFCLGPWYITITNMAEY IEYVPVDNYAIP IVFEDI PADQGHYSY  
KRFGDDK IAVPNALDNI FTYT IMLPEKRFKYAHSI PMPDPCSC IAYPLFTEVEARIQQF IAGLGYNSMGGGVEAWGPGSAFNL SGLGEQSRVSSI EPRYG  
SNTKGLRMLTDLPLAPTKP IDAGIREFCKTCGICAEHCPTQA ISHEGPRYDSPHWDCVSGYEGWHLDYHKCINCTICEAVCPFFTMSNNSWVHNLVKSTVA  
TTPVFNFGFKMEGAFGYGPRYSPSRDEW WASENPIRGASVDIF  
>DET0088 3229009  
MQLVCMDMLITDMLPTPTKPIDAGINKFCYTYKICAESCPGALSMDTDPVYDVPDPEWRPGALDVPYAHKAWHMNNRYCYFCAQCHAVCPFFSTRDASIHNF  
VMGTVTTTSLN GFFANMERTMGYGLKNPDSWWDHDIPLFGISTKFTTEKRG  
>DET0173 3230555  
MSKFHSAVTRRDFMKRLGLAGAGIGTAAAVSPLYRDLDEMIGSKTAQWKRPPWVKELELEETTEIDWDMVERFDARYSAHSPA EVCRFVGLDEYNRVRLS  
NAKQDMLDNKPGSTLRDNALNIGAGTGQYMSGYKTDYVFPAAAGTCCGSF SVYWTGQKGVATPESMGVPKWSGTP EENTQMVRAAMRFFGATDVS VGELENER  
KKFVSTY PQGGDV KYLDNWP PPTY IKKIVFEDVDQGYSTDTKYVIPNKPLYCITYTVPMSKDLFR TGPQSRLSAANISR YRLRAAIDTCTKGF LTALGYQ  
GLEEYPYCFPSQAGAVLDGLAKMGRNSNVCISPEYGSVHG YFDITDLP MAPTHPIDAGIFRFCHTCHKCADECPAKCIDQ GSEPTWDFPASYKPEMPVDY  
HAPGKRLFWNDPIACQMSYNSVAGACGVMATCTFNTNGASMIHDVVKATLAKTSLNGLFWNADKAFGYGLVEGDEKEKFEWIGL PAYGFDTTVGS TVGGY  
>DET0180 3230541  
MDGKINRRDFVKGAGIASAATVATIMATASTVSAEELVNPSIKAMDEMGASLTRDLPESFYKRIENKDG YIGTRVIAPTQR LDAREHGF SQIVRRGSTGD  
WSGEPGDWGPVLF AA VQEKKHA AEITPLEAADYTWSNAFQIAMD RWHITLEPGRYQQA IATAKVELSPEEMTARIKKICRWF GCEQVGI CEVTEDMKPFF  
YSVGRTKGTYTTHGANYVDEGREIPWPYPYKYCIVMADKCDTDTLSAMTGPLVEASAKIACSQSD FAPHYLESIIRSLGHDAKANI FSDTDIMDTPFAVKAG  
LGERGSLV ISDFWGLKIMEVFNLPVDPKIDFGLQEFCKVCKKACADNCPASAI SMDEPESEVDTVVKSIRWFQD GKCLSQR LAYGCSKQSVCPWS  
KPDTLIHEIGRMVGNPAPAFPLVKLDDFFYNRYPEGHATGEWAPWR  
>DET0235 3230432  
MQNFHSTLSRRDFMKIGLAGAGFGAAAATAPVFRDLDEGASIAANTYKKNPWWV KERNYCDPTTPIDWDVVKAFDATHYDI GGQYSEYLAQIGVPSVLN  
ESVAKRHERITSRLGKPGFSMQDWAFCQGAKNVTSSMCYNEFGQSRSMFLGDKMMDEVMTP EQLGLSKYEGTPEYNALMLKSAIRFLGGTDIRCLPVD DKT  
KRVNLNNGENQHPDQPYVWEDG ISWPYETMTKRAIPTKDAHILVFSYNGSFDGTVRSPSWISNGVAFNQCLSGDSIQLYLQRF LKGLGYLVGGDDFPGIASY  
PGAGALSFGFEIGRIGHAVGWKMRCTRLMVTNLPLPADNIDFGVVSFCTTACKKCAEFCPVS AIKMDSEPSWELATDP SNPYLKPQNFNNPGRKTWYLN  
QAGCFSNWCLDTFCGICMGEVFNKLADSSIEHVVKPIANTLLDGGFFNMDKAFGYGCLPEDQWEDWWTLG EKMP IHGI  
>DET0302 3230337  
MNKFHISVSRDFMKGLGLAGAGLAAAAAPVFHDLDEAASAPVAGGFRPWWV KEREYEDPTCEVDWNQIERSDNSW TMHGVRN GVKGGYLFAGQKYL DW  
QKEGSDLAFNGVKNNEPGLTLRDMALEGGASPLMLGNKVVNFVLEPIDQNEVLAQFGFTA AA WPNASSFWVASAPDFWGVSKWQGTPEENSRLRSAMRF  
FGASEVRFALNEKTKKLI FTHVHNTPIV FEDVDRA YEAVAGQKFLVLPDKPLYI ISVAIQMSKEMYRQGNAGIRFAANNMRYRLN NVVQVATQSF LKGI GYQ  
GIGYPSSELFHGMPSQADAILTGFAEMARNNNYCSPEFGFTVVGYSILTDLPLADPKPIDAGYFRFCHT CRKCAEACPSQAI SFDSEPSWEIPPSVDPA  
KETKYSTPGKVFHTDSPACYSRWIGLHGCA RCMGTCVFNTNMKAMVHDVVRATVGTGLFNGFLWNADKAFGYGLVPEKEWEEWWDKDY PVLQDSTIGSY  
YGGY  
>DET0306 3230325  
MSKQHSVSRDFLNLGLT GAGIGLASAASPVFHDMDLASSGPINKRPWWV KERNIKDATTP IEWSAVQRRPYFWAYPMTAHQEA IQGLMKPEDLPYO  
VQRILTAEELETRNQVV IDYCKNEFPGWEPGDPGFDLRNTALAQVSEFFGFTFRPRRQTNGKI INLAQLVADAGGDRIDGFLPPMYEGVKSPEEMGIPK  
WQGTPEENLMTLRSVARLFGAEDVGCIE LDDDIKMMVDS EMDGKKYVFEDVDAAYETATKRVIPNNCKYVFTWSMRQPPNMTRHQAGRKENAPTYIAYMRG  
HFLSCYIKDFVRGLGYTMV GAGGTGIGCIGPTGGFAALSGLGELGRASYV IHPKYGLTNRAMWHITNFP IVP TKPIDFGSREFCKTCKICAEACPF GAIKT  
GDPTEWDDTIYGNPGLF GWHCHNYDLCPHCPCVQGTCPFNTRIDDKSFIHELVRISASHTTVFNTPFRNMDLNFYGRKDQRDWWKEEDFPFGIDT SY  
>DET0311 3230320  
MDKFHSTLSRRDFMKAVGLAGAGVAVTAASPVFHDLDEVSQIGGVTEKRPWYVRELEYAKPTVEIDWNV IQRQTHYNNWEDHLDQAEKD KRAHMYDNTKQ  
MVLENNPNTMFDVAIRHPAWTAVRRNMDYFVGVEGIQDTPPGFEMGFDPESGHCVISPVWATDLFGIITPDNMGVPRWEGTPEQNAALIRMAARWCGGAE  
VGLKAD EYTKKLVHKTCGVLP ILADKNGKEVWEDVDQPYETDKKMI IPEKCNNI I VVVIREARNPALMAPSYRADATTAKSYARSIAFDI HFRGFIHAI G  
YTTAGSGWGPWNVPFVGLSGIGELGRMRGQITPSCGPLIRKVEVFTDLPLPTNPIDFGANRF CRDCGLCAKACPASAIPTFREPTYEITPADDANSNPT  
KLIPEYFNLSGKKVWPNNDFA CHNFVVTSGKHGCAACVASCVFSKDIKSSIHEVVKGVVSQTGIFNGFFANMDHAFGYGIVKDQNMWDFWFEPDKYWPLEG  
IETNL  
>DET0318 3230306  
MLNFHSTLTKRDLFKIGMAGAGLGAASAVAMPFHDLDEL VASTPSTRNLPWFVKEREHGDPTTPIDWDMIQR RPYTWVRMDPTLPVYDNLKSIGAPVSRWL  
DWEDKKAED EILYAKAREDFPGWEPGLDGF GDIRTTALTHASEMFSFGNFPTRMNLGGMVDLVA AVRAAGGYLGSTDSYAGPKMVHTPEEMGTYQGTPE  
DNLRTLKAGIRYFGGEDVGALELDDKLLKLI FTVDQYGALEFGDVEECIETPKQVTPINCKYIFLW TMRQPYEWTRRQSGRFGAATETS YERAYNTKAH  
EQDFVRGLGYQMI SAGNNSLSPAGAWAVLGGELGELSRASYVNHPLYGITVVRVTWGLFDMDPLPPSRPIDFGARKFCETCGICAENCPFGA INPGEPTWKDDN  
AFGNPGLGWRCDYTKCPHCICQGTCPFN SHPGSFIHDVVKGTVSTTP I FNSFFKNMEKTFKYGRKNPATWWEVDDYYPYGVDSY  
>DET0876 3229805  
MSNFHSTVSRDFMKGLGLV GAGLTATATAPLFDKLDVSSAWGNWRPWWIKERELGNPTIEINWNEMQRFDLRENLWMPHALASYVGVKVLQIFHEK  
GASQAEGLKNNKPGQSLRDLALASASTFN TSYVPGQELKTWLGPQKTEFSGVSATPEELGVPKWEGTPEENLMLRAAMRFFGASQIAVSALD TNERKII S  
THDGTNAHNNYLYSWPPATDAKAFV FENVDKAYEGNDKYVLPDKPLWTVCI AVQMSKEMFRHEESH LRMAANSSRYRLHATI QYLTQNFRLRGLGYQMGY  
PKSYW GALPAQATAVLSGIAEMGRNDNYCISPEFGSVCGYFSLITDLP LMPPTPIDAGIFRFCHT CRKCAEACPVGGISFEAEPSWEIPPSAIATDKPISFS  
TPGKRTYHTDALKRLYFDAQPSYCARCMGTCVFNTNTSAMVHELKTTVSS TGLNGLFWNADKAFGYGLVPAEETS KWWDL SPLLYGQDGSIGATDGGYK  
>DET1171 3229566  
MTEVNRDFLKAAGVGAAGLGVAAAGSYWNSYHEGQSAFSMQQEHRQGEHYFNREPFRVDKVT PPSWEVIGPDL PNNHVS VGGIHRIDMRWYGERFKSAGH  
AVSGSSPALGYDLTKGDL DAMPNTWPSNGLAGLSTFYQEYDLYPMMVDIDKEYKYDWLPQLVERFQASIESRANFNANEGLIAMARSEAQRVPSV SITAP  
PEENDWSGVSARRAVFDSPELASQLVKRMAADLGATFVGVTPLNKGWVAYSHAPLGLGGGTGGRGFGINTPIKIPDWDNALI VGTMSWDVNAGDPNYGD  
SWTGYNISQIAQMVKFLKLYGYPARWHS PFGYDFVPGYIAAECGMGEIGRTSNCLAPDFGGNVRPAVITTS LPLAADKPVDFNLA EFCSRCKLCAQVCP  
TQAI SYDDKPKFEIYGQRRFNTNLAKCRDGNL GAGPMGCRACISVCPWTKKNTWHRFVREVLSHDATGTSQNI AIWAERTLYPKHYQEELNPPNYQGVYE  
PPKWIQTNEYVSSFVNTPMGVK  
>DET1519 3229231

MNQFHSTVSRDFMKGGLAGVTLGSAGAVVPQFHDLELASSAKVTNKRGWVVKERYDGNPTIEIDWNLMKRRDLRGSFNSWDYPSLMMAFPGGPQAFHQNS  
AKQEAAVTSCAEEIWPDYAGPTIKDKALASSFWASAYGHSYCHALNQCMPVTVPAPRPEINVPWAQGTPEENAAMLRAVFSLVGLGPIVIGTMTLDEKSQ  
NFIWEYSYGVGTGAESGGKXHVLDSGITESTLDDTSFHIPTSQKYVIATHNISCDFLRRSLAGSGFASTEEMSVYRVFAKSIIEQFIRGLGYNVYIGH  
DLQSAVADMWSVGEHCRMGGIIGSPEYGGLLRTHAVFYTDLPLPVTNPIDAGFVKFCETCGICAETCPVGAIQERGIDRSWDNNGCQSWADDKQAGGSKV  
MYNIPGYKWRCLNFSCAFTPCASACKSNCFNAIGDGSFVHSIVKSTVATSPIFNSFFTSMEGVLHYGKQDKDPASWWNSPDEWFYIGTHPNLLRQ

>DET1522 3229220

MSKLSHSTLSRRDFMKGGLAGAGLAVAAAAPVFDHDELTSFGSNVVKYPWVREIREIKDPTVEIDWNTLERPNANNFKSHRRPTAAEFEAAGVIGGYMTD  
LETPEEALTYLDYCEKEFPWGDYAGAGDIRSTALDNACKFMMGQWPAEIIYQGGKRINVRNAIIAAGGTATFSSFLGPQAATTIRPQDFGAQKQGTPEE  
NFKTLRANAFRLGCQDVGCAELSDTVKFFHKVKGAGSGFNTGDAGGKQIAFKDIDEAYETDDEYAIIPNKCKYIITFTARQSFEGTRRQAGITESFTVWYCY  
ARYVKMICHMQEFIRGLGYQCLNMSGLYFSNPLAVITGLGEHGRMSSPAIHPKNGTNRASGWALLTDLVPVAPTKPIDFGAYKFCETCGICADACPFGLIQK  
GESTWENPAAAKNGLAQGYKQWRNADCPHCPTCQGTCPFNSTQSFIDHMVKVTTTNIIPVFNFFANMERFMEYGRKQPWEFWDIEQPTYGFDTTA

>DET1528 3229214

MHSFHSTVSRDFMKTLLAGAGIGAAAAPVFDHDELVTASPTAGWKRAWFVKEVDEPTLEIDWNQIHRMRRGQPRDRVMAGRSDGYSYYLEIEEFVK  
REFPDWKGTTLRDRALNEAWYSTWMTGTQVTRTAPPTDQLSGNTSIGMPKQGTPEENLRTIRAAFRSFGVSSVTVAPVDEKTRKLFYSYVGVQKVTFFEDI  
DLFESTDRFAIPNCCQWVIHWNLQDTELTSRMPSHVGRAGFPMAYTHVKRIDLLIEQFLRGLGYQSINAGNYCPSAAFIMTGVGEHTRMGTTLNSPEYG  
SHLRGQYRVVTDLPLAVTKPIDAGMERFCETCGVCGTQCPGAIAMGDKNACQDWAADQSVGGDTCMWNIPGYNGWRLDYRCKNCCSCMGACPFPT  
AGASLIEHVVKGTMSVTPVFNSSFRMSSETFNYGHKEPESWDLPLEQIPAYGVNPALLVK

>DET1535 3229198

MKEFHSTLSRRDFMKSGLGVGAGLGTISAAPVFDHDELVTASSGGVQKLPWWVKERDFKNPSVPIWQNLPKMEGTFPYQARPTLSAQERYAMGIPGGSSG  
VWASPEQAQVLFYMYKKEFPWGDYAGLGDNRRTALFMAFKFMRMGMWPGIINMGKRVNVAQAISAAGGTATFTSFLGLRSSETLRPQDFGVPRWEGTPE  
ENLLTLRQVVRFLGGCDVGAQEMDSVDFKLFHETSGGKQLVIEDVDEAAETATKLVIIPAKAKYIILQWTARQPYESTRRQAGEYEDAAVYWSYQRFVVGAI  
QEFTHALGYTAVSTHMAHYHTNAIATLTLGLGEHCRMSPTLVPKYGTNRAMWVIITDMPMLMATKPIDFGVYKFCQTCGICADSCPFGLIEQGDPSWEATQP  
GTRPGFNGWRTNTTTCPHCPVQCGSCPNTNGDGSFIHDLVRNTVSVTPVFNSSFANMEKTMGYGRKDRDWNIDDDTYGINTSY

>DET1538 3229187

MNKFHSTLSRRDFMKGGLASASIGAVAAVSPVFDHDELVEASADSSVKNRPWWVREVDKPTIEIDWDKMAALAIPTTEGCHLPLLLAEFVGVDRVNTAMAQGO  
TALKEGAQKVGSRREASLLDTAIEQASWPHFLTAQAGWREPVTPLADPAPIPELVGSIIMTHETLVGAKWEGTPEENFALLKESAMRFFGAGQIASIELDTNVK  
KMLYPQDASRMFNGPIMSFKYFEDVDKGYMTDNYVIPNTARWIITYTTPMPKEMRYTAPSGVYCAANMSRYRLNHEMTCVQOFLKTLGYQLQSAPFPNG  
ICPSFAVGTLSGLGEMDRINQCVIPEEGAVVGIYKFTDPLPKVSKPIDFGAFRCHSCRKADTCPAKAISFEETWEAPAGPWSVAGKRAYFKNEPECKL  
YQHSATGATCQICTGVCVFVNTKAMIEHVVKSTLSTGTIFNSFLWKADAVFYGHHDAEAWDDLPRYGFDTTMGVRDGGYK

>DET1545 3229172

MSKFHSMVSRDFMKGGLGAGIGAVAASAPVFDHDELIDELIASDTAVQPRPWVKERPIDDPTIEVDVDFMMERHDGRNQGSARVRAMYGADRVLGAAALS  
AAELAERTASNYPGYTYRSRALAGSFKRVSPGTAPGWAETDPAVVKTPPEEREGPKWTGTPEEASRMLRAAMRAYGASLVGYTELQEHDRHIVISYKGD  
NNEKYIGTDVPTAARPIVFNVAKAYETTEKLVIPNVPLWEIALSTQGSNELWRSSGTLGGFANSNTFYNCGNLHASTYNFLRYLGYQLIGTIGNDARYV  
GSEGGAAIMAGLGEASRQKLYTLTPEYGAAPGRLYGLVTLDEPLETHPIDAGIYRFFCHSCQKCADHCPQVVISKEKESWDIPLTEKETIFSVKGTKAFYNN  
LPLCRQYSNETSHGCRICWGETFTVNRGSLVHQIKGTVANVSLFNTYFYKLGAEFGYGADEAKAETWDDLSPTLGQDSTITAADGGYK

>DET1559 3229173

MSSFHSIVSRDFMKGGLAGAGVGTAAAVAPVFRDLDEVIESTAESDYANPWWVKEVDQPTTEIDWNILQRFQKGSYNNFTHALTTEEVKAIQAKTKQEA  
ARMTSSSKPGQTLRDNIAIKVGGWAGVWYRMTQPNLTKDLVEGWDVPTPEMLGVPKQGTPEEGSNMITQALRFFGASSVSFAEINENTRKMIAWQMPQGT  
PDITFEAPKPSFNASNKVIIPDTGIYAVVHTVRQSLDTSRVGYLSDGAGQAYDNCIDIAQWRLQAFKLVLYFVSQNIQGNPIVGVGVMGSLGEQGR  
LAHLITPGWGPMPTRGIVVAPKPIDFGARKFCITCKHADLCPGSLKSKTKLWVDIVQAYDSVKNPLFNNPGLNWNPLDHFKNCRNYWNESEDTYC  
GVCQAVCVSKDDASSVHEIVKATLAKTMTLNSFFVNMDKGFYGLKPEDTIEEWWTNSFPVNGIHYDNDAYYN

>BAV1\_0104 5131704

MSAFHSTLSRRDFMKAAGLAGAGIGAAASAPVFDHDELDEASQIGGVAEKRPWVRELEYAKPTVEIDWNMIQRQTHYNNWEDHLDQTEKDNRAHMYDNTKK  
MVLNPNGNMTFVDIRHPWATAVRNMDYFFGVEGIMKDTPPGFEMGDFPESGHCMSPVWATDLFGIITPGNMGVPRWEGTPEQNAALIRMAARWCGGAE  
VGYLKADEYTKLVHKTGILPILADKNGREVWENVDQPYETDKKLVIPKCDNIIVVTIREERNPALMAPSYRADATTAKSARSIAFDIHRGRFLHAIG  
YTSAGSGWGPWNVPFVLSGIGELGRMRGQITPSCGPLIRKVEVFTDLPLPPTNPIDFGANRFCDGLCAKACPASAIPTFREPTYDITPADDANSNPT  
KLHPEYFNLGSKKVPNNDFACHNFVWTSKGHGCAACVASCVFSDIKISSIEHVVKGVVSTQGMFNGFFANMDHAFGYGIVSDQDMWNNWFPEPKYVPLEG  
IDTNL

>BAV1\_0112 5132438

MSQFHSILSRRDFMKSGLASAGIGAAASLGGVNATAPFFHDVDEITSSPSAITKPKWVVKLQDKPTVPMDLSLLEPGRTKVKWCMPDDPSPGPTLRAPGYSE  
EETRQKFTDYFKKEWGTWDPGPTMEGFDFPERTTEHIGPIRDNALLAGLMPFLFGKLPDEIAAEKQGYLSYLLDKPCGWRYAAPLEQRGGTKWQGTPEEN  
LRTVRAAARFYGADDVGAIEVDEDFLRVMWGVSRFPFIPVVPQFVEWGDVDFVPTPSATRPKIIIPRRCKYFVHWTMRQPPSRLKHDSGTQGGPSQWYTS  
RNPVNVNIQEFVLWGLYIALTNWSGYLIPTYAGVASGAGELSRWSGVLTPKFGNQVRMGYGLTDLPLAPTPIKPFNGYEFCKTCGICADACPMGAIQKG  
EPSWDASEIWNQNGYLGWRLDLTKCSHCPCVQVCPNTTDDSFVHNLVKGTIPNVKLFNGFFANMERDFYGRKPYEDWENAADGKEPVFGIDSTQ

>BAV1\_0119 5131444

MTKSGFDVIKADAMANIGTDFKDLDELKSDSLAVEKLPWWIKQKEFWDFTTEMDWSAQKPFYSIRNFNQHLSPKQAKQYNSRYTQVMEWRKTSKVPGFTHR  
DYAMKCGANTITLLSDLAGIDKNGESALYWTGSPKLMVDVTPPEEMGCPKYEATPEENLLMIRTFKLVCGASKVGAVPVDVKFKSTQPKFYADKIPLVYENV  
DKPYITRSKYVIPDRMKWAVFSTEGGNDLTGRGNWVWVWALGASLYSGGSDYIQIQVQRFKALGYSSVVSGICYNLQNWVWAMGASGMELGRMQISVSP  
FLKWDRARCIITDLPVSTFLPIDAGITRFDICGRCASVCPVSAINSSRESSWDIWPDKPNPNLRPELFPNPGKKTWYFHHLCGAFGRDANDSKCGICM  
LNCVFNRGTDITLPPFIPKPVGANKSALANFLKDMKKNFSCTGFESSMPLGEEDQYTLGASLVENFVWQDSS

>BAV1\_0121 5131472

MNKFHSSVSRDFMKGGLGIAGAGLAAAATVPVFDHDELDEAVSAPVAGGFRPWWVKEEYEDPTCEVDWSQIERSDNSWIMHGVRNKGKGYLQYKLDW  
QKESDRANFNGVKNNEPGLTLRDMALEGGASPLLMGLNKNVFNVLPEIDQDQVLAQFGFTAANWASSFWASAPPDFWGVKQGTPEENSRMLRSAMRF  
FGASEVRFALNEKTKKLIFFTHVHNTPIVFEVDVKAIEVAGQKFLVLPDKPLYIVSVAVQMSKEMYRQGNAGIRFAANNMRYRLNKNVQVATQSFLLKIGYQ  
GIGYPSSELFHGMMPQADAILTGAEMARNNNYICISPEFGTVAGYISLTDLPLAPDKPIDAGYFRFCHTCRKAECAPSQAISFDSEPTWIDIPSSVDPA  
KATLYSTPGKKVPHDTPACYSRWIHLGHCARCMTGCVFNTNSSAMVHDMVRATIGTGLFNGFLWNADKAFGYGLIPEKEWEEWDKDYVVLGQDSTIGSY  
YGGY

>BAV1\_0173 5132211

MDEKINRRDFVKGAGLASAATVATLMATASTVSAEELVNPGGKAMDEMGNASIKRDLPESEFYKRIENKAGYIGTTRVVAPTQRDLAREHGFSQIVRRGSTGD  
WSGEPGDWGPILLAAVQEKKHAAEISPLEAADYTWSNAPQIAMDWHITLEPGRYQAPIAATKVELSPEEMTARIKKICRWFGEQVGI CEVTEDMKPFF  
YSVGRTRGTYTTHANVYDNGREIPWYPYKYCIVMADKCDTDLNALTGPLVEASAKIACSQSDFAPHYLESIIRSLGHDAKANIFSDTDIMDTPFAVKAG

LGELGRSGLVISPWGAQMRIMEVFNPLPLVPDKPIDFGLQEFCKVCKKCADNCPASAI SMDDPESEVDTVVKSIRWFQDGKKCLAQLRAYGCSKQGVCPWS  
KPDTLIHEVGRMVQONPAFAPFLVKLDDFFYNRYPEGHATGEWAPWR

>BAV1\_0276 5132094

MANFHSVINRRDFMKALGLVAGAGAAAAVAVFRDLDDLVA SP TATFPRAWIKERDLWDITTEYDWKAMSRHDTCTETMWIKHWSWAKYVGVKVKKEAASA  
AAIKKEALETGKPGMDLRATALGSTSLYNAPQPYFSYTKTAQGGWGGKSFSTGQSTIKGPDVLGVPKWQDPPANLRMLRAALRFYGAAGQIGVVPYDTNVKN  
KLTCVREGMASMSDKYIEKWP IPAVDARPFVFEDEVKEGYETAELKVIIDPKKELFVVSIVIQPMSREMWRQSGNLRVATNGHRYSLASVWQTKIQGFLTTLG  
YQGLGYPTRAYGPMPTIPGFIFSGLGELGRSNNVCLSPYEGSTHGSFHFLLTDLPLTPKPIDAGMWRFKCTCAICAENCPSQSI SYDKEPSWEITPSKYAPN  
VPVEYSVPGKKVFWRDEPSCQWTE SCGYS CGICMGSCVFNVDNASMIHQVVKGTIATTSL FNGFMKQADKFFGYGLTPESEWNWDMNLPA YAFD TTVGV  
TDGGYKAKGLLQQ

>BAV1\_0281 5132381

MTNYHSSVSRDFMKAMGLVAGGAATAVTPAFRDLDELATADLSVYNKWI KENDFGQLTTEIDWKV FSSFDPAKHMPMPVGFPTANGAMSAKNLANRK  
KRQTDGILNKWPGSTLRDLALD GATGGNYPSIPWTPGNATTPESRGVPKWEGTPEDNTIMCKAATHFYGAPRCGAI EVDDNVKFFNTSVVWENIDTAYIGD  
DGKQHVPNKCKWILTWLTKQNHAMNKYTLRNDPNDPYNVTFRQKGAGENMAYSHAPQIQYQVMGFLKGLGYQAIKATASGNTQFGVWSGLCESGRTTYALS  
PDYGLMVRYIDFAITDPLAPTKPIDAGLAVFCNKCMTCARVCPNNTISLEKEPSWNTKDPGNPGLKTWYLNWTTCAEYGGPFDVCNQCQTVCPFSHDNDKS  
AIHNIIRGTVGTTHLFDGFFANMEKFWGYNQQLSDQAHTDWWYRDLDTWEHDTLLGFGTKGW

>BAV1\_0284 5132431

MSDFHSTLSRDFMKALGLT GAGVGAASA PV IHDVDELLASAESEIKHQNPWVKERYFNPTVPI DWDLKWRVDGRNARLYNVQDSKWFNFAYSETQA  
QIYADACMKEDDPFKWDGARRMALEAGCSFAQFGLSLTNSGTYSLSHSLGNPNRTPERDGYAKWVGTP EENLLLLRGAVRFFGGDDVGVMEHDTHLDRVLC  
TYDMNGFKNSFEDIDEPYQTNPVKVTGIPNSYKWCFTWTLRQPM DVTRQGGIMRAYPNYKNGYEAESVGVWRAYSELAIVENRQLFLRGLGYRGIAGGM  
SAITSGNAIATVAGCMEHARMGQVAVHPKFGSTVRGTYKMTNFP LAPTKPIDAGIYEFCKACQICAEHCPTGIIQKNDPTWTTGRNPEDPGNDNGTFFGEPLP  
YQAQGFEGWRTDIGKCPHCPCQGTCPFNELPNASWVHTLVKATAANTTFLNSFFAQMDRTEFYGRKPFIGYWDDFGTRPTDYDLDTYR

>BAV1\_0296 5132361

MEMNIYHSTISRDFMKGLGSLGAALGAATASAPVFDLDEMITSVPKSTTQHAWVKERYEDIITPVDVTVWSRREALKNMPPGFAGNYVPKEQARLOS  
FRNEIKRGI TEKIPGATLRDVALS EAGRNTTSSSWGLDVKPPWLWGLASALPVEWPEGAPKWESTPEDNLRVTQAAGHYFGTQVQGAMEINEHMI R MFD  
KDGFEHNSASYEKPMRFRSEWFEIPVGFQDANQVKH I PKSCKWAVTYIAAKENALQMTYGMRTGDPDPWKRI PPLGYTTGEAYS KADYKVKVQFMKI  
KMLGYQTYMGLAGGTSNSPAGIFSGLAEEARPALACSPYGNVVRHIGIIVTDMPLSPTKPIDAGIVNFCVKCKCAETCPSGAISMETEQQWEPACTGN  
NPRKRTWYLDWFKCRPWGSPYYCPCNQCQTVCPFNPNKAI IHNVRMTAATTPIFNSFFSLDKSFYAHQSRDEERLNWYRDLNTWQYDDVFGMGTKDKPS  
WL

>BAV1\_0847 5131305

MHNFHCTISRDFMKGLG LAGAGI GAATSVMPNFHDLDEVI SAASAETSLSLGSKLNFPWYVKERDFENPTIIDWISLARNDGYNHQGAYWGPVPENGDD  
KRYDPADQCLTLPEKRDLYLAWAKQFPDWEPG INGHGPTRDEALWFASSTGGIGRYRIPGTQMMSTMRLDGSGTGGWGYFNQPPAAVWGGKYPRWEGTPE  
ENTLMRRTVCQIAQGMVSLFLKYLGYPARWHSPFGYDFPQFMAAGPCVGGTGRVQFVPLPKTPVPIVWEEVDKGYNDQKIVIPNKANVLTMTMPLPEDR  
FKRSLGWSLDASSMIAYPQMAFNGGRVQTFLLKALGYQGLGGDVAMWPGGAFGVMGSLSEQGRAANEISPKYGSATKGSNRVCDLPMVPTKPIDAGIHKFC  
ETCGICTTVCPNSNAIQVGPQWSNNRWDNTPGYLGYRLNWGRVLCCTNCEYCFPFNMTNGSLIHNVVRSVTAATPVFNSFFRQMEHTFYGKMDLNDWVN  
QSHKPW

>cbdba1092 3623213

MAEVNRRDFLKAAGVGAAGLSVAAAGSYWNSYHEGQSASFMSQGEHRQGEHYFNREPFRVDKVT PFSWEVIGPDL PDNHSVGGIHRIDMRWYGERFKSAGH  
AVAGSNPAVGYDLTKGDLDCMPNTWPSNGLAGLSTFYQKYDLYPMMVDVDEKYYKDWLPQLVERFKASIDSRASFNANEGLIAMARSEAQRAVPVSSITPT  
PEENDWSGVSARRAVFESPELASQLIKRMAADLGATFVGVTPLNKGWVAYSHAPLGLGGGTGGRGFLNTPIKIPEWWDNALVLTGMTSWDVNA GDPNYGD  
SWTYNISQIAQGMVSLFLKYLGYPARWHSPFGYDFPQFMAAGPCVGGTGRVQFVPLPKTPVPIVWEEVDKGYNDQKIVIPNKANVLTMTMPLPEDR  
TQAI SYADQPDFEYGLRRTCNLAKCRDGNL GAGPMGCRACISVCPWTKKNTWVHRFVREVLSHDATGTSQNVAIWAERTLYPKNYADDLNP NYKGVYE  
PPKWITTNEYVSFVNTPMGVK

>cbdba1453 3623214

MSNFHSTLSRDFMKALGLV GAGLGTLSAAAPVFDLDEVTSSAIGINKNPWVKERDFKNPTVPMDPK ITRHAGTFKTLPRPTVADF TKAGVGGTSTDL  
ETPEMALTYDAMAKEFGWTPGYAGMDTRTTALCNASKFMMMGAWPGNMEMGGKRNINVOAIIAAGGSPTFTPWLGQDLDTTRPQDFGAPVWQGTPEEN  
LKTCSRSAIRFFGGSVDALELDDDDLLKFFHSKIGGKDLVIDEVEAYETTTKMWIPRCKWVLMWSARQSLEGTTRRQAGITENYAVWYSYRSLPKVGVQIQE  
FIRGLGYQALNPMGKGYLTSPLAAFSGMGEHGRMSSPTIPKYGVTNRAMWALITDPLPLPPTPIDFAGYKFKCTCGICADACPFGLIQKGDPTWENPASAK  
SGIQGTTEGWRNTADCPHCPTCQGTCPFNKPSDFLHAVVKGTVAN TPLLNSFFTNMEKAMDYGRKDP EEWDMDDFTYGI DTSY

>cbdba1455 3623215

MPNFHHTISRDFMKGLGILGTGLTAAATAPVFDLDDIISPKAEWKRPWWVKYREADNPTTEIDWLSMNRWDARQTAQAPGIQAKYLGADEIKKRYANV  
LTKVKAITNDTPGQTLRDYALSSGAGYFMNLPYVTFMGPQKVATPQSLVSPVWQGTPEENSRLRSVAIFYGGGQVGFVIDQIKDKLVFTNHKGAANS  
IGFVENFPPLALGKSYLFEDVEQGYEGATTFVLPSNKQLEYFCFTVPMSKDMFTANESQIMYSANLSRYRFLGNIQNCIQEFIRSLGTYCYGASPFSGM  
MPAIASAQLTGI TEGNRNNGFCTSPEYGPILGVFSLVTDMPLEPTNPIDAGIWRFCQCTCKCADACPVNAIPKDHEPSWELPTVYKPDITHSPGRKQYWTN  
ALDCWFLTEYNGCGACMATCTFNNTNNAPIHELVRTTLATTPLLNSFLWQADKFFGYGLTEDKEAWWDL SMPVYGFDS AATSSQGGYNK

>cbdba1491 3623216

MRGFHSSVSRDFMKVGLGTAGLGAIAASAPVFDLDEIVSSGGKWKRPWWVKEVDNPTMEVDWSLINGSAPNENSEGLHWHQVMAYKLGQDEALRLLAQG  
QEDKINGILANRPGCTLRDCA LNTGGGKHGEITWEGPQTLTPEQMGVPRWEGTPEENSRLRSAMRHYGAGEFGVVEVDQNIKKLLYLKDGSRFLTTPQGVQ  
GYDRPFHYEFKDI DEGYVDDANS AFVLPNKAKYLVTYTVEMPRELFRTSQSDLSNQGSSSRVRRQEQEVINCTQGFRLSIRYRGYGTGPFNGICPSPASATL  
SGLGEMDRKNQCTLPDLGVNVLGKFFFTDLPLVVTKPIDAGIFRCHTCKKCAETCPSPQSI MYEDEPTWETPGNWTATGHKAFFKHEVSCQTLRNSSGVACQ  
TCMGVCVFNVTAAASHEFVKTTIATTSIFNGFLWQADKFFGYGLHDAEWWDL DLP IYIGIDSTRGAYDGGYAK

>cbdba1495 3623217

MRTQHSTISRDFMKGLGLT GAGI GLTAGAAPVFDLDELLTSSGTFINKRPWWVKEREFKDATTPIDWPSVERRKYFWAYPMTAHQEAILEGTMKPEDLPYE  
VQRILTREELRNKVV IDYCKNEFPWEGPDPGFDVRNTSLAQVSEFFGFTRFPRRLQTNQKV INLAKLVSDAGGGDRIDGFLPPLYEGVKTPEEMGVAK  
WQGTPEENLTLRSVARLFGAEDVGCVEDEDIKKMVFEADM DGKYVFEDEVDEAYETATKRVI PNCKKWVFTWMTMRQPPNMTRHQAGRKENAPTYITYMRG  
HYLSCYIKDFTRGLGYTMVAGAGGTGIGCVGATGGFAALSGLGELGRASYI IHPKYGLTNRAMWHHTDFP IVPTRPIDFGSREFCMTCKICSTACPFGAIKT  
GDPWEDDTIYGNPGLGWRCNLDLCPHCPCIQGTCPFNTRDDKSF IHELVRLSASHTTVFNSFFKQMDLNFYGRKDQRDWWKEEDFPFGIDTSY

>cbdba1503 3623218

MKQHTVSRDFAKYMLGSLVAGLVAASAAAYTWSKQDGSIAIASYMGQENRQGEVYFNKRPFEVDKVTWDEWIIGPNLDGDKSSNSIHRIDMGTQWNVRFPP  
RYNPDPTIKRCPINDSFPNSGLAGLTPYQAYYAYPMELDRDKEYMYSWLPQFRERLTATDADRQRFTNEGFIANIRSNQA TAVMGAGVNDPPAISDWQG  
VATKRAVFESPEASEL IKNLQDLEAIWVGISKLNPAWLVLYTHSAKAAGMATPKPGRGFGYDKPIQIPAWWEYQI AVVGMNMGWALSADPNYGDSTMGTYN  
TASQVAQRLVTAIKQMGYPARWHSPLGGYDVCVPPMAVEVGLGQVGRTSNCIAPDLGGNARPAFVTTSLPMAVDKPIDFKMDEFCSRMLCAQVCPVQAI SY

SPKPDYEIRGLRRFYTNHLKCSDFNIGAGPACRACVAVCPWTKKNTWVHRFVREVLSDSTGISOQMAVWAEKNLYPKNFQDSLNPDPFKGVYDPPAWMI  
TKDYISGFTETPMGVK

>cbdbA1508 3623219

MSNYHSTVSRREFMKGLGIAGAGFGAASAVTPVFRDLDELTSAAAHPKRAWYVKEREFDGIIEIDWNILKRRDRTRGYSYWNPMIWKQHYPAYDMEAFNKA  
LDNKTKELWPDYAGPTTRDYSLKNAMYSVGLGCPHYLYNVEQGVTLPHAPRPEAIGMPNAGTPEENFQMIQAAPSLIGLGPSTIGITELDDKSRRFVWEY  
NNYQOHIFDDDIETETRTANPPTIHIPSSHYVIATHNMGADEILRRAPSTIGACTESISYARVAYAKSFVEQFIRGLGYNVYVGHSLQAAPAMDFWSVG  
EHARMGQVCVTPENGAMMRTHAIFFTDLPLSPTRPIDAGITKFCETCGICAEACPFGAINEPGEPTWKDDNAFGNAGFLGWRCDYTKCPHCPCICQGTCPFNH  
PGSF IHDIVKGTVSTTPVFNSSFKNMEKSFYGRKNPATWVDEVDYYPYVGDTSY

>cbdbA1535 3623220

MSQFHSIVSRRDFMKGLGLVAGVGAAGAANPVFHDIDEIASSSSSLQHNPPWVKDQVQPTTIDWDVLKPGRVAYVGTGMFGMGPDLKYSRAETQKLM  
NYLKSIEDPNWQGANLLGVKSASTDPEYDFAGDIKDNALATGSALLTAGVFPMEVIMATGGKYFSLTDHPEGWREVPYITQRGGTKWQGSPEALKVVRRA  
ARFYGDVQAIIPVDEKFLKVMWGTKQMIISNAPTTFFGVDVDFVCTPAVNPTNITIPNKCKWYLNFTCRQPGEVTRHAQSTTQNAAQTYSYANWIKTFKH  
VQDFLWGLGYISLDNIHGRFIPGTGTMCAGAGELSRWSGILTPKYGNMTRVHVGLTDLPLAETSPVDFGARKFCETCGICADSCFOGAIQOGGATWDARY  
AWENSGYLGRWDLTLTNCNHCPCVQGVCPFNAPDKSGIHEIKSTTSTSLFNGFFRSMKDTFHYGRKPAEAWDDPNQPVWGMDDTV

>cbdbA1539 3623221

MVDPOKWLNRDRFIKKTGLASVAATAVAVVNTTGIITAEFVKPGIKAMDPLGNASIKRELLENFYKKEIHRPGYIGTQIVSSGERMDAREHGFAQIVRRS  
STGDWSGEPGDWGPVLLAAVKEKNKHLAIESDIERLDYTWSTLQVAMDRWHINLAPGKFEPAPI SATKVEMSPAETAATKIKMARWLGAEQVIGCEVTEDM  
KPFYYSIGRKHGNSGPFVANYEEDEGREIPWPYPYKYCIVLADKCDTDTLSALEGPLEVARSVCSCIDFLPHYLESIRALGYDAKANPFSDDTIIEAPF  
AVKAGLGLGRSGLLSPWGAQLRLLEVFNTMPLVDPMPIDFGLQEFCKVCKCAENCPQSAISMDEPSEVITTVKSIRWLQDEKCLARRLAYGCAKCS  
VCPWSKPDITLHHEIGRMQNALASFLVKVDDFFYVNRFPPEGHSAAADYAPWR

>cbdbA1542 3623222

MSKLSHSTVRRDFMKALGLTLAGLVAAATTPVFNLDLDDVKAASQADWKRPPWVKQVDKPTIEIDWQMLQRWDQRTNLHFPNMDKYLGEAMARASIEGTA  
KQLQRMQDGTGYSYLDQALSTGAIGLTSANFDLLSFINYLPKVIITPEEQGLPKYQDTPPEENTRMMRAMRFFGAGQVSVWQLEESTKLLIYAWDRGLTWG  
LPYGTGYSCKKPVYFEDVEKSYVIANFCKYVSYTPVMAKEAWRCAPTATIDANMSRYRIQGNIQGTQKFLASLGQYALGAPKGNPNCIGCPAPA  
ALILSGIGEANRINQFITPEEGSTAGGPYMIITDLPLAPDKPIDAGLFRFCHSCRKCAETCPSESIMLEAEPKWDCAPYQSPGHKAFFKNDLNCNYSNVQG  
FAGGICMAVCTFNVNDVASIHHVVKATVSTTGLLNSFLWKADSAFYGGLKDPNDWGLSLPQYGFDSITYANNGGYK

>cbdbA1546 3623223

MSKFHCTVNRDFMKALGLGVAGIGAVSATTVPVFRDLDEVAASSPKAVLHRGWYVKERDYGDPTIEIDWSLMKRRDLRGSYNWDFPTLMFTYPPGPEAFQKHL  
HDQGTAVTAKAKEIWPEYTGPTSTRYALSNAFAASAYSNSGYVLNANQFMKTIAPAPRPQDIGMPVWQGTPEENTAMIRAVFSLVGLGPMIGTMTLDEKSE  
NFVWEYNGKGVTTGGDAKYGKHIIFDPNISEAYSDTTFRIPRTPSHKYVIATHNLSCDEFRLRGLSGSGAYGTEEMSVYRVAYAKSVVEQFIRGLGYNVAYGH  
DLQAATAWDIWSGVGEHCRMGGITGSEPELGLLRTHAVFYTDLPLELTKPIDAGFAKFCETCGTCACTCPVGAISPRGVDNRWDSNTGQDWNVDKQAGGTQV  
MYNMPGFKGWRNCSFACAFSPGCSACKGACPFNTIADGSIHIVKSTVATTPVFNSSFMSMEGILHYGKQDKDPEKWWNNPEAWHIYGTNPNNLRQ

>cbdbA1550 3623444

MSKLSHSTLRRDFMKGLGLAGAGLGAASAAPVFDHDELTSLSGNSVNYPWYVKEREFKNPTEIDWNVLSRQANANFKSHAKPTADYDAAGVVGRYMYD  
LETPAEALILYDYCEKEFPWGDWKGWGGSDVTRTALDNACKFMMGMWPMGDMYQGGKRIINVRNAIIAAGGTGSYSSFLGPQCF SIRPQDVGASRWQGTPEEN  
YKTVRNFRLGADQVGCALIDSSTVVKFHRAKGGASGMFAGQGDAGGKQVAFKIDVVPYETGDEYAI PNKCKYIITFTARQSFEGRTRRQAGITEGFAVWYS  
YARYIKMMCHMQEFIRGLGYDCLNMSGCLCFSNPLSAITGLGEHGRMSSPTIHPKNGTNRANGWAFITDMPIAPT KPIDFGAYKFCETCGICADSCPFGIQ  
KGPSTWENPDAAGNLAQGGQFRGWRTDNVKCPHCPTCQGTCPFNSTSESIHDMVKVTTTNLPLFNGFFANMERFMEYGRKQWFEWFDIEQPTYGFDTTA

>cbdbA1560 3623445

MSKFHSMVSRDFMKALGMAGAGVGAATAVFPVFDLDELMSSSVTPAKRPWVVKERELFNPTSEIDWDLMQRFDRKNEASRRIATMYSRVETIDAAAVT  
QKKIDADR IAKQTPGFDTKYQALKAGYSGSTESPAWAYPGIVDEADWAKTPEELGMPKWSGTPEENSRLLYAALRYYGAMFIGYAEVEDKWRNKLKFKTTTD  
AVRNWTWTPQNPDPPESEDELRYVYENVDPQYSELKRGSTGRSAGKHVIPSKPLWLIITATGACMEATKTL DSTISKNSNSTADNGHEALVRVTFNFVRLGG  
WRAFQDGGHQTSESNFSAAMILTGLAENSROGNYCLTPETGPNHIFPTMLTDFPLVPTKPIDAGLFRFCHSCKKCADACPSQISHADEPSWDVDPVGDGKPR  
VFCNPGHKGFWPDMAGCNYYSKGGTSGCWVYANCFTFSEDKAMMHNIRGTVSTSLFNGFFSSMSNTFTGYGYPYESPEVWDMSLPAYGFDSITIGAAGG  
YSK

>cbdbA1563 3623446

MVKSHTLNRDFMKALGFVAGVAGALSAGSPVKDLDEMASAGSSNKRAWI KEVDTPTEIDWDMKLRHDATTIPQVAYASFVGDVAAAQGAQKADRK  
QWIAEDKSGYTLRDYALFDDAAAYGQAGFSDHLDGDTVTPYGMGSPSDLGLPAWNGSPEETTAMIRQAFRLGTGTSIVELNENNRKLVYGVWDWGDKAI  
FENVEKAYETDKRVIPEKCRYAVVFSMPMSEEMNKRAPTLTLDGATLALSLSLTLFQIRARQFRFRLGQGLGSFTYVNNSTINPALAVISGMGEQGRGQ  
CVFPEYGTMARLGSVITDLPLVDPKPIDSGVWVNFCKTKCLCASHCPSGALNPDVPSWDVKYSGNHPGKKYVHCDGMNCRGYWYDLTSLCSICVASCVF  
NKAIGHDIKATTAVTPAFNSFFRTMDQAFGYKYSNRDPESWWDINGEPMFGIDSR

>cbdbA1570 3623447

VNISHSTLRRDFMKGLGLAGAGLGAASAAPVFDHDELTSLSGNSVNYPWYVKERDFKNPTVEIDWDTLERPNANNFKSHPRPSAADFTAAGVVGNM  
LETPAEALALYDYCEKEFPWGDWKGAGAGDIRSTALDNACKFMMMQWPAEIIYQGGKRIINVRNAIIAAGGTATFSSFLGPQAATTIRPQDFGAAKWQGTPEE  
NFKTLRNAPRFLGQCDVGCALIDNDTVKFFHKIKGAGSGFNTGEAGGQIAFKDIDEAYETADEYAI PNKCKYIITFTARQSFEGRTRRQAGITSFVSWYCY  
ARYVVKMICHMQUEFIRGLGYQCLNMSGLYFSNPLSVITGLGEHGRMSSPAIHPKNGTNRANGWALLTDLVPVATNPIDFGAYKFCETCGICADACPFGLIQ  
GESTWENPAAAKNLAQGGQFKGWRTNNTDCPHCTCQGTCPFNSTSQSF IHDVMKATTTNLPLFNGFFANMERFMEYGRKQWFEWFDIEQPTYGFDTTA

>cbdbA1575 3623448

MNQFHSVSRDFMKGLGLTGVTLGSASALSPQFRDLDELANSKAVVNRKRWVVKERDYGNPTIEIDWNLMKRRDLRGSNWDYASLMMAFPGGPPAFKANT  
PKQAAAVTAKAEIWPDIYAGPTIRDKALSSSFWASAYGHSGYCRSQNHGMPTIIPAPRPSAINTPAWEGTPEENAAMLRAVSLVGLGPVIGTMTLDEKSO  
NFIWEYSVSWTGDSEVPGNKHIVLDSGITESYVDATSFHIPTSQKYVIATHNISCDFLRRSMAGAGFSSTEEMSVYRVAYAKSIVEQFIRGLGYNVYVGH  
DLQSAVADMWSVGEHCRMGGQVIGSPEYGLLRTHAVFYTDLPLVPTNPIDAGVVKFCETCGICAEETCPVGAIQERGIIDRSWNNCGQSWADKQAGGSKV  
MYNIPGYKGRNCLFSCAFTPCASACKSNCPFNAIGDGSFVHSIVKSTVATSPIFNSFFTSMEGLVHYGKQDKDPASWWSNPDEWFIYGTHPNLLRQ

>cbdbA1578 3623468

MIKKHSTVSRDFMKGLGLAGAGIGAAAAVTPVFDLDELMSSSQATLSRPWYIKNERFGDIGIELDWNLIKRRDLRQYDNFTMKHLPFYQPGGPPAFMQGM  
ESAAQKNSDRLKELWPDYKASTRDLALANALGSVGTFTGYALNTTQGGWVDPAPTPEELGIPKWEGTPEENLMIMIRAAFSVMGLGPMVGVSELNEKTKNFV  
YEYTGDSWTWLPQGGPSEHIFDDNISEFYRTQNPNTLHIPSSHYVISTHNLSDDELTRRTYSPGLTPAEAISYSRVAIAKNFVEEFIRGLGYHVYVGH  
QPALVWDFLSGVAEHSRMQNAVSPEYGMRAHATFYTDLPLAFTNPDPDAGLTKFCETCGICADACPVGSI SPVGTDRNWDNACQDWDANDIQNGGAETMY  
NIPGYKGRNCLFSCMTTKAACGAACKFSCFPNALRNGSFMHSIVKATVNTSLFNGFFRNMEEETKYGYMAKPESSWETPEAWYVYGTNPNSLRQ

>cbdbA1582 3623469

MAQFHSVLSRDFMKGLGLAGAGVGAASAAPVFRDLDEMASAPSARVNPWVVKQVNETTTPIDWDVLPPLGPAKYPGPPMGLIPPAYESEIFRMKMDRI

LEKYPNWDKGANLTFPGASSDPEYDYVDGIDKNALVMGAALLNMGMPKELIMATHGAYMGLTDHPEGWRIMPAVEQRRGGTKWQGTPEEALKIVRAAVRF  
YGFDDVTAIPVDDHFLKVMYGEKWLITHGAPTTFFEGDVEDDICTPAIRPTKIVLPRRMKWFLOFSSRQPGEVTRHALGTTQAGAYYYTSWVKIVKSIQD  
FLWGLGYISLDGNCGRFAPTGATGILAGAGELARWGVMTPKYISVRVMHGLVTDLPLEECKPIDFGGRKFCETCGICADACPMGAISKDEPTWDAAKPYQ  
YGGYLTWRDMDAVCSHCPCVQCCTCFNAPDKSGVHELKGTVANTSIFNGFFTSMDKSFYGRKPEEWWNSEQVPTGIDTISY

>cbdb1588 3623470

MLNFHSTLTRKDFLKGIGLAGAGLGAASAVTPMFHDLDELVASTPSTRNLPWFVKEREHGDPTTPIDWSMIQRRPYTWARMPSLPPVYDNLKAIGAPVTRWL  
DWADKKAEDILFAKAREEFPGEFEGIDGFDLRTTALTHASEMFAFGQFPQKMNLLGNNMVDLVPRAAAGGYLGSTDSYAGPKIVHTPEEMGGTKYQGTPE  
DNLRTLKAGIRYFEGEDVGALELDDNLKLIFFTVQYKTLFEGDVEECVETPRQVIIPNKCKYIFLWTMRQPYEWTRRQSGRFEAATETSYERAYNTKAH  
FQDFARGLYQMI SAGNNSLSPAGAWAVLGGELGELS RASYNHPLYGITVRVWTFGLTDMPLPPSRPIDFGARKFCETCGICAEACPFGA INPGEPTWKDDN  
AFGNAGFLGWRCDYTKCPHCPI CQGTCPFN SHPGSF IHDIVKGTVSTTPVFN SF FKNMEKSFYGRKNPATWWDEVDDYPYGVDTSY

>cbdb1595 3623471

VKTFHSTLSRRDFMKALGLAGAGI GAVSAAAPVFHDVDEL TASSGGVQKLPWWVKEREFKDPSPV IDWQNLPKMEGTFPYQARPTLSAQERYAMGIPGGSSG  
T WASPEQAQVLF DYMKKEFPGEWEPGYAGLGNRTTALFMATKFMRMGMWPFGEINMGNNRVNMQA I LKAGGTATFP SFMGLRSSETLRPQDFGVPRWEGTPE  
ENLLTLRQVVRFLGGCDVGAQEMSDVFKLFHEQSGGQLV IENVEAAETPKFLV I PAKAKY I LQWTA RQPYESTRQAGEYEDA AVYYSYQRFPFVGAI I  
QEF I HALGYTAVSTHMMGYHTNAIATLTGMGEHCRMSSPTLVPKYGT TNRAMVMMTDMPLMSTKPIDFGVYDFCKTCGICADSCPFGLIEKGDP SWEATQP  
GTRPGFNWRNTTTCRPHCPVCQSSCPFN TNGDGSF I HDLVRNTVSVTPVFN SF FANMEKTMGYGRKDSRDWWN IDDYTYGINTSY

>cbdb1598 3623472

MPNFHSIVSRRDFVKALGLTGAGLGTAAAATPVFQDLDDVTASPSAEWKRPWWVKNREIDDPTEIDWDMMYRSDGRMVGQVRSVQIKYLGE EEVNRRNAV  
AKFTADGLKNDTPGLKVRDQALAAAGVMSLPMAMGMIPSI SFGMPATATPEARVAKYQGT PAENSRMLRSALIFYGAAQVGYGEVTRQYKDKLFRTPDKGN  
AATAYQGAWPPPLTQCKQYFFEDVPVGYDTAEKMFVPANVLYEPTFIVPMSKEMFRCS PSSALQNAANLSRYTAMAQIQPKIQAFIKSLGYQCYGYTLPMN  
GAVPTIASAVLTGLGEGARNIGAFNNPEFGSITGLFHLITDLPLEPTPPIDAGMWRFCHTCTKCADACPSAIP TDHEPSWDIPKLYGQEDTTHVPGKQFW  
TNSVDCWLGRVQLGTCGACMGCTCTFNTGKNAIH DYVKATLSTTPVFN SFLWQADKAFGYGLRAGEDLENWDMPOPIGGFDSTCGIQGGSY

>cbdb1618 3623473

MSRFHSMVSRDFMKAVLAGAGL GASAAISPVFHDVDEFMSSPTAEWKRPWYVKNRELEDPTELDWLSMYRSDGIWGTQNNPTQDFFLGAE EGA KRRAAA  
AAYSANAVKTNQSGMTLRDRALSSGNYMYPITFMGPASSTTPESLGVKQGTPEENSKMIRAAMIHF GAAQVGM AEITDRVKTCLVREYDKDTAHKKYIFE  
DVPKGYEGADKLVFPDKVPLYDFAFTHPLNKEMFRSSPSSD IGSAGNSLRYSQFSII QPRIQMFMQVLYGTCYGYTRFNGAIPTIATA TLTLGEGARNNG  
AFISPEFGPCVGLFSLVTDLPLEPTPPIDAGMWRFCQCTCKADECPAQCSIFEHEPTWDPVKIY G KEDTTHIPGRKQFWTDG VACWYSYKATIGGCGACMGCT  
CTFNTDIANIHTIVRATLSTTPVFN SFLWQADKFFGYGVHEDKEAWWDSQPTLGFDTAHVTVGKDY

>cbdb1624 3623474

MKEFHSTLSRRDFMKSLGVVAGLGTMSAAAPVFHDLDEVSTSLTGINKNPWWKERDFKNPTVPIDWSKVTRQPGVFQGLPRPTVADFTKAGVVGSTDL  
ETPEMALTYLDAMAKEFPGWTPGYAGMDVRTTSLCNASKFMMMGAWPGNMEMGGKRINVI GAIMAAGGSPTFPWLPGLDPTTRPQDFGAPVWQGTPEEN  
LKTCSRSAFRFPFGSDVGAIEIDDDVLKFIHSQIGGKAVVVEDVEAYETTTKMWIPRCKWILMWSARQSLEATRROAGITESHAVVYSYSRFPKVGAFQFE  
FIRGLGYQALNPGMMGLANPLAALAGMGEHGRMSSPTITPKYGT TNRAMWALITDLP LPLTPPIDFGAYKFKCTCGICADACPFGLIQGDP TWENPASAK  
SGIQQGT FEGWRNTADCPHCPTCQGTCPFN SPSFLHAVVKGTVANTPLLSFFTNMEKAMDYGRKDPEEWWDMDDFTY GIDTSY

>cbdb1627 3623475

MGNFHSSLSRRDFMKGLAGAGI GAVAAAAPVFHDLDEVASADSSVKNRPWWVREVDKPTIEIDWSKTS SLPFQEGCHLPLLLAEFV GWRVNSAMAQGV  
AALNAGAKKTSKAEI SLLDTSMQEAAWPHFIAHAGWREPVYPALEGAAP IPELVGQTYTHESFGVPRWESTPEENFALLKSAMRFAGAQIASIELDANVK  
SMFYVDSRMMFNGPPMAYGFEDCDNGYVTDTHFIIPNKARVVVYTT PMPKEMYRTAPSGVCAANMSRYRLNQE TMACVQKFLGLGYQGLQSAPWPNG  
ICPSPAVATLSGLGEMDRINQCVIPEEGAVVGIYKFI TDLP LPSKPIDFGAFRCHSCRKCADTCPAKAISFE EEP TWEPAGPWS TGGKAYYKNEPECKL  
YQSTGATCQICTGVCVFNVTKAMIHEIVKSTLSTTGIFNSFLWKADVAFGYGHDAEAWWDL DLPYGFDTMGMVRDGGYK

>cbdb1638 3623476

MSKFHSMVSRDFMKGLGMAGAGI GAVAAASAPVFHDI DELIASDTAVQPRPWWKERPIDDPTEIEVDFGMMERHDGRDQGSARVRAIYYGADRVLGAAALS  
AAELAERTASNYPGYTYRSRALAGSFKRVSQGTSPGWAETKDPAPVKTPEERGEPKWTGTPEEASRMLRAAMRAYGASLVGYTELQEHDRHVI FSYEKDGS  
NNEKI GTTIPVTAARP I VFNVPKAYE'TEKLVI PNVLWEIALSTQSNELWRSAGTLLGGMANGNTFYNCANLHASTYFNKLRYLGLYQLIGTIGNDARYV  
GSEGGAAIMAGLGEASRQKLYTLTPEYGAPGRLYGVLTDLPLEPTHPIDAGIYRFCHSCQKCADSCPPQCSKEKESWDLPLTEGKETIYSVKGTAFYNN  
LPLCRQYSNETSHGCRICWGECTFTVNRGALVHQI I KGTIANIPLFNTYFYKLGDAFYGTDPEKAEAWWDL SLP LTLGQDSTIVAADAGYK

>cbdb187 3623477

MDEKINRRDFVKAGLAAATVATLMATASTVSAEELVNPGGKAMDEMGNASIKRDLPE SFYKRIENKAGYIGTTRVVAPTQRDLAREHGF S QIVRRGSTGD  
WSGESGDWGPILAAVQEKKHAAEISPLEAADY TWSNAFQIAMDRWHITLEPGRYQQAPIAATKVELSPEEMTARIKKICRWFGEQVIGICEVTE DMKPF  
YSVGRTRGTYTTGHANYVDNGREIWPYPYKYCI VMADKCDTDLNALTGPLEASAKIACSQSDFAPHYLES IIRSLGHDAKANIFSDTDIMDTPFAVKAG  
LGELGRSLVISPWGAQMRIMEVFTNLPLVPDKPIDFGLEQFCKVCKKCADNCPASAI SMDDEPSEVDTVVKSIRWFQDGGKCLAQR LAYGCSKQGVCPWS  
KPDTLIHEVGRMVGQNPFAFPLVKLDDFFYNYRPEGHATGEWAPWR

>cbdb238 3623478

MNKFHSSVSRDFMKGLGIAGAGL GAAAAATPVFHDLEAVSAPVAGGFRPWWVKEREYEDPTCEVDVWSQIERSD NSWIMHGVRNNGVKGGLYFAGQKYLW  
KQEGSDRAFNGVKNNEPGLTLRDMALEGGASPLMLGNKVVNFVLEIDQDQVLAQFGFTA AAWPNASSFWASAPPDFWGVKQGTPEENSRMLRSAMRF  
FGASEVRF AELNEKTKKLIFFTHHVNTPIVFEDVDKAYEVAGQKFLVLPDKPLYIVSVAVQMSKEMYRQGNAGIRFAANNMRYRLNNVQVATQSF LKGIYQ  
GIGYPSSELFHGMMP SQADAILTGAEMARNNNY CISPEFGTVAGYYSILTDLP LAPDKPIDAGYFRFCHTCRCAEACPSQAISF DSEPTWDIPSSVDPA  
KATLYSTPGKKVPH TDS PACYSRWI GLHGRCARCMGT CVFN TSSAMVHDMVRATIGTGLFNGFLWNADKAFGYGLIPPEKWE EWWDKDYVVLGQDSTIGSY  
YGGY

>cbdb243 3623479

MQGFHSALSRRDFMKGIGLTGAGFGIAAATAPVFRDLDEGASTAANTYKKNPWWVKERNYCDPTTPIDWDVWKPFDA TTYDYIGGQY PEEYLAQIGMPSMF  
EDPASRRRIASRLGKPGYSQDWAFCQGARNVTSIMCHNEFGQPF SMFLGDKAMMDINTPEELGLPKYEGTPEYNALMLKS AVRF FGGTDI RCLPVDKDT  
IRLLNVGDSRHPEQPYWEGG I SWPYETQTKRVIPTKDAHILVFSYNGSYDGTVRSPSWISNGVAYNQCLSGDAIQLYLQRFVKGLGYWVGGDDYPGIAS  
Y GAGTMSGFGEIGRIGHTVHWDKIRSTRLLITNLP L PADNPIDFGVSNFCTTS CRKCAEF C PVS A I KMDKEPSEWELATDPSNLYPKQNFNNPGRKTYWLN  
QAGCFSNWCLTD TFCGICMGECVFNK LADSS IHEIVKPIANTLLDGGFFNMDKAFGYGCLPEDK WEDWTTLGEMPIHGIG

>cbdb280 3623480

MSRFHSTLSRRDFMRGIGLASVGLTLLS VTPRFTDLDEIISDEKANYQPWWVREQDQGVTEVDWDDKQTFNQAQYDNRAHLRPSPLDDEYRTLPGTFVS  
ELYYSNMKTFIQENKPGFSLRDRGIYWGASPMIKDVLGYRRAGGIGSGSGESFTGYDFLDLVDTPESIGVPRWEGTPEENSRMLRSALKLMGASTVGFVEI  
NDNNKLVFTGSSLVGKPVVWEDTENIYQ TNEKQV I PNCKWAVVYTI RQPLETTKRGPSWISD GAVGIAYDQCDIVQYRLQAF LKIGYQAVGGNIFGLGP  
LPWAGELSGLGEVGR LQNLITPEFGPLIRESKFNLIDL PVAPT KPVNFGAQRFCHTCLKCADACPGNALQKNREPSWDITPKYDEYVKPELFNSPGHKTWYF  
DHFCKRKFWEESASFQVCGQTCVFSKEKLSIHEFVKPIVIGQTSLNFSSFFYNM DRAFGYGLHSEDIENWDMNLPTFNIDYSEKPYI



>cbdbA84 3623481

MSNFHSTVSRDDFMKALGLAGVGLGAAGAATPVFHDLELDELISSKPEVRESPPWVKEREFEDPTVEIDWSLKTHTFDYNLVHVSWSKETAQEWQEKQAEILIREA  
VANNTPGNTLKDMLANLGMGLHYAGSDLFNYSQLSRPEYSTVILDTDFVSGQIDNKYGLTRTQLGI PKWQGTPEENSAMVAAVLHFLGSTRVGVYSINENK  
VWFSYDKNRRIISWGDVEEVPNTPGILWPGNKLGSLLVLPNKCNSLISFVIPSQSGISKYHHTALSRAATFLGYAESTIISARLQIFLTKLTYDGVGSDASANN  
VGFGLVAGNGLGRLNLYLVNPHWGHALIRKADFLMLTDLPLAPTRPIDSGITRFCATCKKCAEMCPGALSALADGPSWDTLSAQNGLGVKNYTNDRHWHKCRPFAW  
PPSPNTVSGCGVCQAVCVFSKLEESSVHDI IKPVVSTQPLFNRRFKRMDDMFNYNPENPEEWSRDKYKYPYSRVAPGN

>cbdbA88 3623482

MSAFHSTLSRRDFMKAVLAGAGIGAASAASPVFHDLEASQIGGVAEKRPWVRELEYAKPTVEIDWNMIQRQTHYNNWEDHLDQTEKDNRAHMYDNTKK  
MVLENNPNTMFDVAIRHPAWTAVRRNMDYFFGVEGIMKDTPPGFEMGFDPESGHCMMSPVWATDLFGIITPGNMGVPWRWEGTPEQNAALIRMAARWCGGAE  
VGYLKADEYTKKLVLHKTGCGILPLADKNGREVWENVDQPYETDKKLVIPKCDNIIVVTIREERNPALMAPSYRADATTAKSYARSIAFDIHRGFLHAI  
YTSAGSGWGPWNNVFPVLSGIGELGRMRGQITPSCGPLIRKVEVFFTDLPLPPTNPIDFGANRFRCDCGLCAKACPASAIPTFREPTYDITPADDANSNP  
KLHPEYFNLGKVVWPNNDFAHNFWVTSKGHGCAACVASCVFSKDIKSSIHEVVVKVVSQTGMFNGFFANMMDHAFGYGIVSDQDMWNNWFPEPKYWPLEG  
IDTNL

>cbdbA96 3623483

MSQFHSILSRRDFMKSLGLASAGIGAASLGGVNAAPFFHDVDEITSSPSAITKKPWWVKLQDKPTVPMDSLLOQGRTKVWCPMPDDPSGPTVLRAPGYSE  
EETRQKFTDYFKKEWGTWDPGPTMEGFGDFPERTTEHIGPIRDNALLAGLMPFLFGKLPDEIIAAEKQYLSYLLDKPCGWYAAPLEQRGGTKWQGTPEEN  
LRTVRAAARFYGADDVGAIEVDEDFLRVMWGVSRFPFIPVVPVQFEWGDVDDFVTPSATRPTKIIIPRRCKYFVHWTMRQPPSRLKHDSGTQQGSPQGWYTS  
RNPVNVNIQEFLLWGLGYIALTNWSGYLIPGTGYAGVAGAGELSRSWGLVTPKFGNQVRGMYGFLTDLPLAPTKPINFGGYEFCKTCGICADACPMGAIQKG  
EPSWDASEIWNQNGYLRWLDLTKCSHCPCVQGVCPFNTTDDSFVHNLVKGITIPNIKLFNGFFANMERDFYGRKPYEDWENADGKEPVFGIDSTQ

>GT\_0124 8808573

MSSFHSIVSRDDFMKALGLAGAGVGTAAVAVPFRDLDEVI STSAESDYANPWWVKEVDQPTTEIDWNKLRQFKGSYNNFTHALTTEEVKAIQAKTKQAEI  
PMTSSSKPGQTLRDNAIKVGWAGVWYRMTQPNLTKDLVEGWDVPTPEMLGVPKQGTPEEGSNMIIQALRFFGASSVSAEINENTRKMIIWAQMPQGT  
ARDITFEAPKPSFNSANKVIIPDTGIYAVVHTVRQSLDTSRRVLSLSDGAGQAYDNCDIAQWRLQAFKLVGYFSVSNQIQNGP IVGWGVMGSLGEQGR  
LAHLITPEWGPMTIRQSTMNIVNLPVAPKPIDFGARFKCITCKKCADLCPGALSKETKLFWDIVQAYDSVKPNLFPNNPGLNPNPFDHFKCNRWNSDSTYC  
GVCQAVCVFSKDDASSVHEIVKATLAKTMTLNSFFVNMDKGFYGLKPEDTIEEWWTNSFPVNGIHYDNDAYYN

>GT\_0241 8808689

MDEKINRRDFVKAGLASAATVATLMATASTVSAEELVNPGGKAMDEMGNASIKRDLPESEYKRIENKAGYIGTRRVVAPTQRDLAREHGFSSQIVRRGSTGD  
WSGEPDQWGPILLAAVQEKKKHAAEISPLEAADYTWSNAFQIAMDWRHITLPEGRYQQAIIAATKVELSPEEMTARIKKICRWFGEQVGI CEVTEDMKPPF  
YSVGRTRGTYTTGHANYVDNGREIPWPYPKYCIVMADKCDTDLNLTGLPLVEASAKIACSQSDFAPHYLESIRSLGHDAKANI FSDTDIMDTPFAVKAG  
LGELGRSLVLSIPWGAQMRIMEVFNLPVLPDKPIDFGLQEFCKVCKCADNCPASAI SMDEPESEVDTVVKSIRWFQDGGKCLAYGCSKQGVCPWS  
KPDTLIHEVGRMVGQNPAPAFPLVKLDDFFYNYRPEGHATGEWAPWR

>GT\_1189 8809639

MSNFHSTLSRRDFMKSLGVVAGLGLTSLAAPVFDLDEVTSIAIGINKNPWWVKERDFKNPTVPMDWPKITRHAGTFKTLRPTVADFTKAGVVGSTDL  
ETPEMALTYDAMAKEFPGWTPGYAGMDTRTALCNASKFMMGAWPNNMEMGGKRIINVQAAI MAAGGSPTFPWLPGLDITTRPQDFGAPVWQGTPEEN  
LKTCSAIRFFGGSDVALELDDILKFFHSHKIGGKDLVIEDVEEAYETTKMVIIPRCKWVLMWSARQSLGTRRQAGITENYAVWYSYRSLPKVGVQIQE  
FIRGLGYQALNPGMKGYLTSPLAASFSGMGEHGRMSSPTITPKYGVNTRAMWALITDLPLLPPTPIDFGAYKFKCTCGICADACPFGLIQKGDPTWENPASAK  
SGIQQGTFEGWRTNTADCPHCPTCQGTCPFNKSPDSFLHAVVKGTVANTPLLSFFTNMEKAMYGRKDPPEEWDMDDFTYGIDTYS

>GT\_1191 8809641

MPNFHHTISRRNFMKGLGILGTGLTAAATPVFHDLDI I SSPKAEWKRPWWVKYREADNPTTEIDWSLMNRWDARQTAQAPGIQAKYLGADEIKKRYANV  
LTKVKAITNDTPGQTLRDYLSAGAGYFMNLPYVTTFMGPQKVATPQSLSVVWQGTPEENSRLRSVAIFYGGQVGFVIDQKIKDRLVFNHKGAAANS  
IGFVENFPPPPALGKSYLFEDVEQGYEGATTFLVPSNKQLYEFCFTVPMKDMFRANESQIMYSANLSRYRLFGNIQNCIQEFIRSLGYTCYGYASPFSGM  
MPAISAQLTGITEGNRRNGFCTSPEYGPILGVSLVTDMPLEPTNPIDAGIWRFCQCTCKCADACPVNAIPKDHESWELPTVYKPDITHSGRKQYWTN  
ALDCWLFLTEYNGCGACMATCTFNNTNAP IHELVRTTLATPLLSFLWQADKFFGYGLTDEKAWWDL SMPVYGFDSAATSSQGGYNK

>GT\_1237 8809688

MSKFHKTISRRDFMKGLGLAGGGIGAAVAAMPVFDLDEFVSSSEANSTKDPWYVKHREHFDPTITVDWDIFDRYDGYQHKGVYEGPPDAPFTSWGRLQMR  
MSGEEQKRIILAAKKEFPWGDGGLHGRGDQRADALFYAVTQPPFGSGEEHGLFQPYDPQPKFYARWGLYGPPhDSAPPDGSVPKWEGETPEDNFLMLRAA  
AKYFGAGGVGALNADPKCKLIYKKAQPMTLGKGTYSEIGGPGMIDAKFYPKVPDHAVPINFKEADYSYNDAEWV IPTKCESIFTTFLPQPQELNKRTEG  
IAGAGPYTVYKDFARVYTKDPLVQMFIKNLGYHALYWP IGWGPGCFMTFFDQGEQGRGTAIIHWKFGSSQRGSERVVTDLP IAPTPIIDAGMFECKTCYICRD  
VCVSGGVHQEDEPTWDSGNWVNVQGLYRTDWSGCHNQCQSSCPFTYLGLENASLVHKIVKGVVANTTVFNSFFTMEKALGYGLTMENSNWKEEG  
PIYGFDPGT

>GT\_1269 8809720

MSQFHSIVSRRDFMKGLGLVAGVGAAGANPVFHDIDEIASSSSSLQHPNWWKDVDPQPTPIDWDLVLPGRVAVYVGTGMFGMGPDLVKYSRAETQKLM  
NYLKSSEDPNWQGANLLGVKSASTDEYDFAGDIKDNALATGSALLTAGVFPMEVIMATGGKYFSLTDHPEGWREVPYITQRGGTKWQGSPEEALVVRRAA  
ARFYGFDDVQAI PVDEKFLKVMWGTQMIISNAPTTFEFGDVFVCTPAVNPTNITIPNKCKWYLNFTCRQPGEVTRHAQSTTQNAAQTYSYANWIKTFKH  
VQDFLWGLGYISLDNIHGRF IPTGFTGTMCAGELSRWSGILTPKYGNMTRVHVGLTDLPLAETSVPVDFGARKFCETCGICADSCPOGAIQOGEATWDARY  
AWENSGYLWNRDLTLNHCPCVQGVCPFNAFDKSGIHEI IKSTISTSLFNGFFRSMDKTFHYGRKPAEAWDDPNQPVWGMDDTTV

>GT\_1276 8809727

MSKLHSTLSRRDFMKGLGLAGAGLGAVAASAPVFDLDELTSLSGNSVNYRYPWVKEREFKNPTVEIDWNVLSRQNNANFKSHAKPTPADYDAAGVVRGYMD  
LETPAEALILYDYCEKEFPWGDWKGWGGSDVRTALDNACKFMMGMWPGDMYQGGKRIINVRNAIIAAGGTGSYSFLGPGQCF SIRPQDVGASRWQGTPEEN  
YKTVRNARFLGAGQDVGCAEISDSTVVKFFHRAKGGASGFMAGQDAGGQVAFKIDVPEYETGDEYAI PNCKYIITPTARQSFEGRTRQAGITEGFAVWYS  
YARYIKMMCHMQEFIRGLGYDCLNMSGCLCFSNPLSAITGLGEHGRMSSPTIHPKNGTTRNANGWAFLDMP IAPTPIIDAGYKFCETCGICADSCPFGI IQ  
KGPSTWENPDAAGNGLAQGFWRGRTDNVKCPHCPTCQGTCPFNSTSESIHDMVKVITTNLPLFNFFANMERFM EYGRKPQWEPWDIEQPTYGFDTTA

>GT\_1285 8809736

MSKFHSMVSRDDFMKALGMAGAGVGAATAAPVFDLDELMSSSSVTPAKRPWWVKERELFNPTSEIDWDLMQRFDRKNEASRRIATMYRSVETIDAAAVT  
QKKIDADR IAKQTPGFDTKYQALKAGYSGSTESPAWAYPGI VDEADWAKTPEELGMPKWSGTPEENSRLLYAALRYYGAMF IGYAEVEDKWRNKL FVKTTD  
AVRNWTTWTPQNDPPESEDELRYVYENVDQPYSELKRGSTGRSAGKHVIPSPLWLIITATGACMEATKTL DSTISKNSSTADNGHEALVRTFNFRALGG  
WRAFQDGGHQTSESNFSAAMILTGLAENSROGNYCLTPETGPNHIFPMTLDFPLVPTKPIDAGLFRFCHSCKKCADACPSQISHADEPSWDVDPVWGKPR  
VFCNPGHGFWDPMAGCNYSSKGGTSGCWVCYANCTFSEDKAMMHNI IRGTVSTTSLFNGFFSSMSNTFGYGPYESPEVWDMSLPAYGFDSTIGAAKGR  
YSK

>GT\_1287 8809738

MVKSHSTLNRDDFMKALGFVAGVGLSAGSPVFKDLDEMASAGSSNKRAWWI KEVDTPTEIDWMLKRHDATIPQVAYASFVGDVAAAQAGAKQADRK

QWIAEDKSGYTLRDYALFDAAYGWQAGFSDHFLGDTVTVPYGMGSPSDLGLPAWNGSPEETTAMIRQAFRFLGTGTISIVELNENNRKLVYGVWDWDGKAI V  
FENVEKAYETDKKRVIPEKCRYAVVFSMPMSEEMNKRAPTLLGDATLALSYSLSTLSPQIRARQFRFRLGYQGLGSFTYVNNNSINPALAVISGMGEQGRLLGQ  
CVFPYEGTMRALGSGVITDPLVDPKPIDSGVWNFCCKLASHCASHPSGALNDDVPSWVDVYKSGNHPGKKVYHCDGMNCRGYWYDLTSLCSICVASCVFAKK  
NKAGIHDIIKATTAVTAPAFNSFFRTMDQAFYKYNSRDPESWWDINGEPMFGIDSRV

>GT\_1295 8809746

VNISHSTLSRRDFMKGGLGAGLGAASAPVFDHDELTSLSGNVKNYPWYVKERDFKNPTVEIDWDTLERPNANNFKSHPRPSAADFTAAGVVGNNMTD  
LETPAEALALYDYCEKEFPWGDWYAGADIRSTALDNACKFMMMGQWPAEIIYQGGKRIINVRNAIILAAGGTATFSSFLGPQAATTIRPQDFGAAKWQGTPEE  
NFKTLRNARFLGCDVGC AEIDNDTVKFFHKIKGAGSGFNTGEAGGKQIAFKDIDEAYETADEYAIIPNKCKYIITFTARQSFEGTRRQAGITESFSVWYCY  
ARYVKMICHMQEFIRGLGYQCLNMSGLYFSNPLSVITGLGEHGRMSSPAIHPKNGTTRNANGWALLTDLVPVAPTNPIDFGAYKFCETCGICADACPFGLIQK  
GESTWENPAAAKNGLAQGFQKWRNTNTDCPHCPTCQGTCPFNSTQSFIHDMVKAATTNLPFMNGFFANMERFMEYGRKQPQEFWDIEQPTYGFDTTA

>GT\_1300 8809751

MNQFHSVTSRRDFMKGGLGLTGVTLGSASALSPQFRDLDELANSKVVNKRGWVVKERYDGNPTIEIDWNLMKRDRLRGFSNWDYASLMMAFPGGPPAFKANT  
PKQAAAVTAKAKEIWPDYAGPTIRDKALSSSFWASAYGHSGYCRSQNHGMPTIIPAPRPSAINTPAWEGTPEENAAMLRAVFSVLVGLGPVIGTMLDEKSO  
NFIWEYSVSWTGDSEVPGNKHIVLDSGITESYVDATSFHIPSQKYVIATHNISCDFGLRRSMAGAGFSSTEEMSVYRVAYAKSIVEQFIRGLGYNVTYGH  
DLOSAVADWMSVGEHCRMGOVIGSPEYGLLRTHAVFYDPLPVTNPIDAGVFKFCETCGICAEETCPVGAIQERGIDRSWDDNCCGQSWADDKQAGGSKV  
MYNIPGYKGRWNLFSHCAFTPCASACKSNCPFNIAIGDSFVHSIVKSTVATSPIFNSFFTSMEGLVHYGKQDKDPASWNSPDEWFYIGTHPNLLRQ

>GT\_1303 8809754

MIKHSVTSRRDFMKGGLGAGAGIAAAAVTPVFDHDELMSSSQATLSRPWYIKNREFGDIGIELDWNLIKRRDLRQYDNFTMKHLPFYQPGPPAFMQGM  
ESAAQKNSDRKLWPDYKASTRDLALANALGSVGTFTYALNTTQGGKVDPAPTPEELGIPKWEGETPEENLMMIRAAFSVMGLGPMVGVSELNEKTKNFV  
YEYTGDSWTWLPQGEDVGEHIFDDNISEFYRTQNPNTLHIPSCHKYVISTHNSLDELTRRTYSPGLTPAEAISYSRVAIAKNFVEEFIRGLGYHVYGH  
QPALVWDFLSGVAEHSRMQNAVSPYEGMMRAHATFYDPLPFTNPTDAGLTKFCETCGICADACPVGSI SPVGTDRNWDNACQDQWANDIQNGGAETMY  
NIPGYKGRWNTFSCMTTAAACGAACKFCPPFNALRNGSFMSHIVKATVNTSLFNGFFRNMEETLKYGYMAKEPSSWWTPEAWYVYGTNPNSLRQ

>GT\_1307 8809758

MAQFHSVLSRRDFMKGGLGAGAGVAAAASVPVFRDLDEMASAPSARVNMPWVVKQVNETTTPIDWVLPGLPAYKGGPPMGLIPPAYPESEIFRMKMDRI  
LEKYPNWDKGANLTFPGASSDPEYDYVDIKDNALVMGAALLNMGMPKELIMATHGAYMGLTDHPEGWRIMPAVEQGGTKWQGTPEEALKIVRAAVRF  
YGFDDVTAIPVDHFLKVMYGEKWLITHGAPTTFEFGDVEDIVCTPAIRPTKIVLPRRMKWFLOFSSRQPEVTRHALGTTQAGQAYYTSWVKIVKSIQD  
FLWGLGYISLDCNCRGFAPTGATGILAGAGELARWGGVMPKYGISVRVMHGVLTDLPLEECKPIDFGGRKFCETCGICADACPMGAIKDEPTWDAAKPYQ  
YGGYLTWRDMVCSHCPCVQGTCPFNADFQSGVHELKVTANTSIIFNGFFTSMDKSFVYGRKPEEWWNSPEVPTGIDTISI

>GT\_1312 8809763

MLNFHSTLTKRDLKGLGAGLGAASAVTPMFHDLDELVA STPRNLPWFVKEREHGDPTTPIDWSMIQRPPYTWARMDPSLPVYDNLKAI GAPVTRWL  
DWADKKAEDILFAKAREEFPGEFPGIDGFDLRTTALHASEMFAFGQFPQKMNLLGNMVDLVP AIRAAGGYLGSTDSYAGPKIVHTPEEMGGTKYQGTPE  
DNLRTLKAGIRYFGGEDVGALELDDNLKLI FTVDQYGKTLFEGDVEECVETPRQVIIPNKCKYIFLWTRMQPYEWRTRRQSRFEAATETS YERAYNTKAH  
FQDFARGLGYQMSAGNNSLPAGAWAVLGGELGELSRASYVNHPLYGIVTRVWTGFLTDMLPPSRPIDFGARKFCETCGICAEACPFGA INPGEPTWKDDN  
AFGNAGFLGWRCDYTKCHPCPI CQGTCPFN SHPGSF IHDIVKGTVSTTPVFN SFKFNMEKSKFYGRKNPATWWDVDDYYPYGVDTSY

>GT\_1318 8809769

VKTFHSTLSRRDFMKGGLGAGAGI GAVSAAAPVFDHDEL TASGGVQKLPWWVKEREFKDPSPV IDWQNLPKMEGTFPYQARPTLSAQERYAMGIPGGSSG  
TASPEQAQVLF DYMKEFPGWEPGYAGLGDNR TTFMATAKFMRMGMWPGE INMGGRNVNMQA I LKAGGTATFSPFMGLRSSETLRPQDFGVPWRWEGTPE  
ENLLTLRQVVRFLGGCDVGAQEMSDVFKLFHEQSGGKQLVIENVEAAETPKLVIPAKAKYILQWTRARQPYESTRQAGEYEDA AVYYSYQRFPFVGAVI  
QEFIHALGYTAVSTHMMGYHTNAIATLTGMGEHRMSSPTLVPKYGTTRNAMVMMTDMPLMSTKPIDFGVYDFCKTCGICADSCPFGLIEKGDPSWEATQP  
GTRPGFNWRNTTTCPCVQGCSPFN TNGDGSF IHDVLRNTVSTTPVFN SFANMEKTMGYGRKDPDRDWNIDDYTYGINTSY

>GT\_1321 8809772

MPNFHSIVSRRDFVKALGLTGAGLGTAAAATPVFDLDDV TASP AEWKRPWWVKNREIDDP TTEIDWDMYRSDGRMVGQVRSVQIKYLGE EEVNRRNAVG  
AKFTADGLKNDTPGLKVRDQALAAAGVMSLPMAMGMIPSI SFMGPATATPEARVAKYQGT PAENSRMLRSALIFYGAAQVGYGEVTRQYKDKLFRFTDKGN  
AATAYQGAWPPPLTQCKQYFEDVPGYDTAEKMFV PANVPLYEFTFIVPMSKEMFRCS PSSALQNAANLSRYTAMAQIQPKIQAFIKSLGYQCYGYTLPMN  
GAVPTIASAVLTGLGEGARNIGAFNNPEFGSITGLFHLITDLPLEPTPPIDAGMWRFCHTCTKCADACPWSAIP TDHEPSWDIPKLYGQEDTTHVPGKKQFW  
TNSVDCWLGRVQLGTCGACMGCTCTFNTGKNAIHDYVKATLSTTPVFN SFLWQADKAFYGLRAGEDLENWDMQPIGGFDSTCGIQGGSY

>GT\_1338 8809798

MSRFHSMVSRDRDFMKA VGLAGLGA SAAI SPVFDHDE FMSSPTAEWKRPWYVKNRELEDP TVELDWSLMYRSDGIW TQGNNTQDFFLGAE EAGKRRAAA  
AAYSANAVKTNQSGM TLRDRALSSGNYMYPITFMGPASSTTPE SLGVPKWQGTPEENSKMIRAAMIHF GAAQVGM AEITDRVKT KL VREYDKD TAHKKYIFE  
DVPKGYEGADKLVFPDKVPLYDFATPHLNKEMFRSSPSSD IGSAGNSLRSQFSII QPRIQMFMQVLYGTYCYGTRPFNGA IPTATA TL TGLGEGARNNG  
AFISPEFGPCVGLFSLVTDLPLEPTPPIDAGMWRFCQCTKCADECPAQCSIFEHEPTWDPVKIYKEDTTHIPGRKQFWTDGVACVSYKATIGGCGACMG T  
CTFNTDIANIHTIVRATLSTTPVFN SFLWQADKFFGYGVHEDKEAWWMSQPTLGFDTAHVTVGKDY

>GT\_1344 8809795

MKEFHSTLSRRDFMKS LGVVGAGLGTLSAAAPVFDHDEL VTSSTLGINKNPWWVKERDFKNPTVP IDWSKVTRQPGVFQGLPRPTVADFTKAGVVGSTDL  
ETPEMALTYDAMAKEFPGWTPGYAGMDTRT TALCNASKFMMFGAWPGNMEMGGKRVNVI GAIMAAGGSPTFTPWLPGLDPTTRPQDFGAPVWQGTPEEN  
LKTCSRSAFRFFGGSDVGAIEIDDDVLKFIHSQIGGKAVVVEDVEEAYETATKMVIPRCKWILLMWSARQSLEATRQAGITESHAVWYSYSRFPKVGVAQFQE  
FIRGLGYQALNPGMMGLANPLAALAGMGEHGRMSSPTIPKYGTTRNAMWALITDLPPLPPTPIDFGAYKFCCTCGICADSCPFNLIQKGDPTWENPASAK  
SGIQQGTFFEGWRTNTADCPHCPTCQGTCPFN SKPDSFLHAVVKGTVANTPLLSNFFTNMEKAMDYGRKDP EEWDMDDFTYIGDTSY

>GT\_1347 8809798

MGNFHSSLSRRDFMKGGLGAGAGI GAVAAAAPVFDHDEL VASADSSVKNRPWWVREVDKPTIEIDWSKTSLSLPPQEGCHLPLLLAEFVGVWRVNSAMAQGV  
AALNAGAKKTGSKEAISLDTSMQEAAPWPHIAHAGWREPVYPALEGAAP IPELVGQTYTHESFGVPRWESTPEENFALLKSAMRFFGAGQIASIELDANVK  
SMFYVDASRMFNGPPMAYGFEDCDNGYVTDTHFIIPNKARWVVTYTPMPKEMRYTAPSGVCY AANMSRYRLNQETMACVQKFLGLGYQGLQSAWPNG  
ICPSPAVATLSGLGEMDRINQCVIPEEAVVGIYKFITDLPVSKPIDFGA FRFCHSCRKCADTCPAKAISFE EEP TWE P AGPWS TGGKKAYYKNEPECKL  
YQSTGATCQICTGVCFVNVNTKAMIHEIVKSTLSTTGIFNSFLWKADVAFGYGHHDAAEWDLDLPRYGFDTTMGVRDGGYK

>GT\_1353 8809804

MSKFHSMVSRDRDFMKGGLGAGAGI GAVAAAAPVFDHDEL IASDTAVQRPWWVKERIDDP TIEVDFGMERHDGRDQGSARVRIIYGADRVLGAAALS  
AAELAERTASNYPGYTYRSRALAGSFKRVSQGTSPGWAETKDPAPVKTPEERGEKPTGTPEEASRMLRAAMRAYGASLVGYTELQEHDRHVFISYEKGS  
NNEKIGTTPVTAARP I VFNVPKAYETTEKLVIPNVPLWEIALSTQGSNELWRSAGTLLGGMANGNTFYNCANLHASTYNFLRYLGYQLIGTIGNDARYV  
GSEGGAAIMAGLGEASRQKLYTLTPEYAGPRLYGLVTDLPLEPTHPIDAGIYRFCHSCQKCADSCPPQCISKEKPSWDLPLETEKETIYSVKGTKAFYNN  
LPLCRQYSNETSHGCRICWGECTFTVNRGALVHQI I KGTIANIPLFNTYFYKLGDAFGYGTDP EKA EAWWDL SLP T L GQDST IVAADAGYK

>8657036VS 8657036

MKGPHLTLRDRFMKSLGLAGLATVVKGTVPVFDLDEVI SNENSNWRRPWWVKEREFDKPTVDVDWGI YKRFDKFTYAPANARI AMFQOEAVMKANQDWN  
NLVAKRLQEDTAGFTIRDRAMDEGLCEEINGGYPAPRTASLPQLADLADPPIVLSKGRWEGTPEENSRMVRVCLLAGAGSVAFVGAEDKAEKFIYTHE  
HVWGDFFKHXYIGDYDDIWEDEETRYHPHKCKMYTYTIPSEELLRRAPSNAFEATVDQAYSERVI FGRMTNFWALGKYICGGDCSNASHIHTATAAWTG  
LSECSRMHQQTISSEFINIMRQFCIWTDLPLAPTPPIDMGLMRYCLTCKKCADTSPGSAISHEDPTWERAFAFYCQEGVYDYDFS HAKCSQFWKQSSWGCSM  
CTGSCPFGHKNYGTVHDVISAATAVTPIFNGFFRNMDDLFGYKGNPGMESWWDQEPRIYRGLYREIF

>8657042VS 8657042

MEMNIYHSTISRNFMKLGLSAGALGAATASAPVFDLDEMITSVPKSTTQHAWVVKERDYEDI TTPVDVTVWSRREALKNPMPGFAGNYVPKEQARLOS  
FRDEIKRGI TEKIPGATLRDWALSEAGRSNTTSSSWMGLDVKPPWLWGEASALPVEPWPEGAPKWESTPEDNLRVTQAAAGHYFGTPQVGAMEINEHMI RMFD  
KDGFEHNSYSEYEKPMRFRSEWFE DIPVGFQDANQVKH I PKSCKWAVTYIAAKENALQMTYGMRTGDPDPWKRI FPLGYTTGEAYS KADYVVKVQFMKFI  
KMLGYQTYMGLAGGTSNSPAGVFSGLAEEARPALACSPYYGNVVRHIGIIVTDMPLSPTKPIDAGIVNFCVKCKCAETCPGSAISMETEQQWEPACTGN  
NPRKRTWYLDWFKCRPWGSPYPCNCQVTCVFPNPNKAI IHNVRMTAATTPIFNSFFSLLDKSFGYAHQRSDEERLNWYRDLNTWQYDDVFGMGT KDPKS  
WL

>8657050VS 8657050

MSIFHSTLNRDRFMKALGLTGAGMGTIAASAPVMHVDDELLASAEDTEIKHQNPPWVKERDYFNPTVPI DWDLKWRVDGRNARLYNVQDSKWFYFAYSETQA  
KIYAEYAENEDPEFKWGDPRRMALEAGCSFAQF GSLTSSGTYLSHSYTRQNPPTKPTETNGYAKWVGTPEENLLLRGAVRFVGGDDVGVMEHDTHLDRVLC  
TYDMNGYKNSFEDI DEPYQFQSPVTGIPNSYKWCFTWTLRQPMVTRQOQGMRAYPNYKYGEAESVGVWRAYSELAIVENRDLQLFRLGLYRGTAGGM  
SAITSGNAIATVAGCMEHARMQVAVHPKFGSTVRGT YKMMTNFPLAPTKPIDAGIYEFCKSCQICAEHCPTGIIQKSDPTWTTGRNPEDGNDNGTFGEPLP  
YQAQGFEGWRTD I GKCPHCPVQCGTCPFNELPNASWIHTLVKATAANTTLFNSFFAQMDRNFYGRKPYIGFWDDFGTRPT YDMDTTR

>8657053VS 8657053

MTNYHSSVSRDRFMKAMLVGAGMGAATAVTPAFRDLDELTA STDL SVYKWWIKENDFGQLTTEVDWVFNSTDAKHPMPVMFGPTANGAMSAKLANRK  
KRQTDGMLNKWPGSTLRDLALD GATGGNYPSPWPNGPNVSTPEGRGVPRWEGT PEDNTIMCKAASHFYGAPRCGAI EVDKVKKFFNTSVVWEDTDTAYTTS  
DGKQHVPNCKKWLITLWLTQNHAMNKYTLRNNPDDPWYNTVFRQKAGENQAYSHAPQIQYQVMGFLKGLGYQAIKATASGNTQFVWVSLCESGRTTYALS  
PDYGLMVRVIDFCITDLPLAPTKPIDAGLSVFCNKCMCAKVCPSNTISLEKEPSWDTKDPGNPGLKTYLWNTTCAEYGGPFDCVNCQTVCPF SHDNDKS  
AIHNIIRGTVGTHTLDFGFANMEKFWGYNQVTLSDQVHTDWWYRDLTWEHDTLLGFGTKGW

>8657058VS 8657058

MANFHSVINRRDFMKALGLV GAGAGAAAAVAVPFRDLDDVVASPTATFPRAWIKERDLWNITTEYDWKAMSRHDTCTMVIKHSWAKYVGVKVKKEAASA  
AAIKKEALETGKPGMDLRASALGSTGLYNAPQPFYSYVKTAGWGGGKSLTGQSTIKGPDVLGVPKWQDPPSNLRLRALRFYGAQI GVVYDNTVNVK  
KLTCCVREGGMASSDKYIEKWP IPAVDARPVWFEDVEKGYETAELV I PDKKELFVSV I QPMSREMRWQSGNLRVATNGHRYSLASVWQTKIQGFLTTLG  
YQGLGYPTRAYGPMPTIPGFLFSGLGELGRSNNVCLSP EYGSTHGSFHLTDLPLTPKPIDAGMWRFCCTCAICAENCPSQISYDKEPSWEITPSKYAPN  
VPVEYSVP GKVFWRDEPSCQWTESCGYSCGICMGSCVFNVDNASMIHQVVKGTIATTSLFNGFMKQADKFFGYGLTPESEWNWDMNLPA YAFDITVGV  
TDGGYKSKGLLQ

>8657123VS 8657123

MDEKINRRDFVKGAGLASAATVATIMATASTVSAEELVHPGGKAMDEMGASLTRDLPTSFYKRIENKDG YIGTRRVIAPTQRDLAREHGF SQIVRRGSTGD  
WSGEPGDWGPVLLAAVQEKKHAABEITPLEAADYTWSNAFQIAMD RWHITLEPGRYQAP I AATKVELSPEEMTARIKIKRWFGEQVGI CEVTEDMKPFF  
YSVGRTKGTYTTGHANYVDEGREIPWPYPKYCIVMADKCDTDTLSAMTGPLVEASAKIACSQSDFAPHYLES IIRSLGHDAKANI FSDTDIMDTPFAVKAG  
LGEGRSGLV I SPWGAQMI MEVFNLPVLPDKPIDFGLQEFCKVCKCADNCPASAI SMDEPESEVDTVVKSIRWFQDGKCLSLRQLAYGCSKQSGVCPWS  
KPDTLIHEIGRMVQNPAPAFPLVKLDDFFYNYRPEGHETGEWAPWR

>8658187VS 8658187

MGKTKYGGKENSEMASFHSTLRRDFMKSLLEVAGLGTMSAAAPVFDLDEVTSSAIGINKNPWWVKERDFKNPTVPI DWSKVTRQGVFQGLPRPTVADF  
EKAGVIGGTSTDLTPEMALTYLDAMAKEFPGWTPGYAGMGDVRTTSLCNASKFMMFGAWPGNMEMGGKRVNVI GA IMAAGSPTTPWLGQDLDTTTRPQD  
FGAPVWQGTPEENLTKC RTAIRFFGGSDVALELDDDDILKFIHSGIGGKDVVVEDVDEAYETATKMVI PRKCKWVLMWSARQSLGTRRQAGITENFVWYS  
YSRFPKVGQFQEFIRGLGYQALNPGMMGF LANPLAALS GMGEHGRMSSPTLPKYGT TNRAMWALITDLPLLPPTPIDFGAYKFKCTCGICADSCPFNLIQ  
QGDPTWENPASAKSGIQQGFEGWRTNTADCPHCPTCQGTCPFNKSPDSFIHAVVKGTVAN TPLLSFFTNMEKAMDYGRKDPEEFWDLNDFTY GIDTSY

>8658189VS 8658189

VPNFHSALSRDRFMKGLGVV GAGLGTAAAAAPAFRDLDDV I SSPNAEWRKPPWVKYREL DNP TTEIDWSLMNRWDGRQGTQAPGIQAKYLG VDEIKKR YANV  
LTKVNAITSETPGQTLKDYALSSGAGFMNLPYVTTFMGPQKVATPQSMNVPWAQGTPEENSRMLRSVIF YGGGQVGFV IDQKIKDKLVFTNHKGAANS  
IGFVENFP PPPALGKAYVFEDVDVGYEGATT FVLPANKQLYEFCFTVPM SKDMFRTANESQIMYAAANLSRYRLFGN IQNSIQEFIRSLGYTCYGYASPFSGI  
MPA IASAQLTGITEGRNNGCTSP EYGPVGLVSLVTDMPLEPTNPIDAGIWRFCQCTCKCADACPVNAIPKDHEPTWDLPN IYKADIVHSPGRKQYWTN  
AVDCWFLTEYNGCGACMATCTFNNTAP IHELVRATLATPTLNTFLWQADKFFGYGLNEDKEEWDL SLPVYGFDSAATS SHGGYDK

>8658217VS 8658217

MSKFHKTISRDRFMKGLGLAGAGI GAVAASAPVFDHIDELVSSEANSTKDQWPYVKHREHFDPTITVDWD I FDRYDGYQHKG VYEGPPDAPFTSWGNRLQVR  
MSGEEQKRILAAKKEFPWGDGGLHGRGDQRADALFYAVTQPPFGSGEEHGLFQPYDPQPKFYARWGLYGP PHSAPPDGSPVKWEGT PEDNFLMLRAA  
AKYFGAGGVGALNADPKCKLIYKKAQPM TLGKTYSEIGGPGMIDAKIYKVPDHAVPINFKEADYSY YNDAEAWIPTKCESIF TFLPQPQELNKRTGG  
IAGAGSYTVYKDFARVGLVQMFIKYLGYHALYWP I GWGPGGCTFFDQOGEQRTGAAIHWKFGSSQRGSERVITDLP IAPTPI DAGMFEFCKTCYICRD  
VCVSGGVHQEDEPTWDSGNWVQYGLYRTDWSGCHNQC GCMQSSCPFTYLGLENASLVHKIVKGVVANTTVFNSFFTNMEKALGYGLTMENSNWKEEG  
PIYGFDPGT

>8658239VS 8658239

MSDFHSIVSRNFVKALGLAGAGIGTVA AAVPVFKDLDEVIASPSAANKRPWWVKDRELYQPTLEVDWDMLTAPDGRVSGQQTETQIHYLGSEEVKRRLLSN  
IMSPNVEAANNTPGKTLRQALGFSSI VPMNIHGISFMGPGLIPTPATTPGVKWEGTPEENSRMVRVCLTFLGAGMVGFG EISSLEKEKVFYTYHKQVPNK  
RQIFEDVDVGYEADAKYVFPDRKLYKISMLPMSREMYRTSDRSLQFANVSRHRHSM LQPAFQEFIRIGYHCYGPVQAGMPAAVSAITLGLAES  
RNSGYCISPDYGPVSGFFTFITDLPLEPTPIDSGIWRFCQCTCNKCAQCTCPTQV I PYDKEPSWELPSLYGKPD IHPAGKRMFYANHIECWMYCFEGGCGTC  
MATCTFNVNGAAMVHDVVKATLSTPLFNEFLWKADKTFGYGAKSGEEKEDWDL SLPMSGWDTTFSFKHGGY

>8658241VS 8658241

MSNFHSTLRRDFMKALGLAGAGV GAVSAAASVFDHVDDELTA SSGVQKLPWWVKERDFKDPVSP IDWQNLPKMEGVFPVQAKP TLTAQERYAMGIPGGSSG  
TWANPEQAQVLF DYMKEFPGWEPGYAGLGDNR T TALFMATKFMRMGLWPGEINMGKRVNVAKAISAAGGTPFTSFLGLRSSETLRPQDFGVPWRWEGTPE  
ENLLTLRQVVRFLGGCDVGAQELDSDVFLK FHEKSGGQLVIENVEAAETAFLKVI PAKAKYILQWTRARQPYESTRQAGEYEDAAVYYSYQRFPFVGAI I  
QEFIHAMGYTAVSTHMSGYHSSAIATLTGMGEHRMSSPILVPKYGT TNRAMWV IITDMP LMSTKPIDFGVYDFCKTCGICADSCPFGLIEKGDPSWEATQP  
GTRPGFNGWRTNTTTCPCHPVCQGSCPNTNGDSGFIHDLVRNTVSVTPVFN SFFANMEKTMGYGRKDPDRDWNIDDIYTYGINTSY

>8658249VS 8658249

MSQFHSSTLRRDFMKALGLAGAGV GAMSAAATVFDHVDDELTA GTAGTVQKQFPWWVKECDFKPKTPVPI DWQTLPKMDGIFPYQSAPTLTPQERFAMGIPGGAAGT  
WASPEQSQVLDYMKKEFPWEPGYLGMGDNRTALFMAAHFMRMGMPGEIQMGKRVNVQAAIILKAGGTPFYWSFLGLRSSETLRPQDFGVPWRWEGTPEE

NLQTLRQVVRFFGGNEVGAQELDADIFKFKYHKKNLGKDLVIENVDEPEETATKMMVIPSASAKYILQWTARQPYESSRRQAGEYEDAAYVWAYQRFPVLVTAIIO  
EFIYALGYKVVSTHMTGYHTNP IGLTGMGEHCRMSSPVLFPKYGTTRNAMWVIITDMPLASTKPVDFGVYEFCKTCGICADSCFPGLIEKGEPSWEATQPG  
SRPGFNGWRTNTTTCPCPCVQCACFPNTDNGNSFIHELVRGTVTNTTVFNSFFANMEKTLGYGRKDRDWDMDMEDYSYGINTRY

>8658252VS 8658252

MAKFHSTLSRRDFMKALGIAGAGMGTAATSVPVHDLLEELAASDGEAYARPVWVKETDMPVEMDWSI IKPFNDAYTMDGGDGAAYLIEPDIKFSWQATAK  
QNLAEKYNKEPGWSIPDRALSDASSKMGFKYIEHCYVAPDFRNDPYFKYSGPSYQSQTDDGNWIKLQATPEENAKIVRAALRFFGVNQARFFKLDKMKKL  
VFTKTEYGTPIVYEDVERGYGTDISFGGDKIVIPKNKELWGISLIPMSKAMFRQGTGLLRAAANYRRYMEIANVQLAAQVFNFIQYQLLGYTYTAGGVMA  
ALPAAIFTGMGELGRNTSFIASPENGTICGYFVWLTDLPLAVDKPIDCGTFKFCCTCQKCAEVCPTQCISYDKEPSWDIPRSATFPKQEPWSSPGKKVFWR  
DEPGCFKAWKSPFGCGTCMGCTCFNTNTQAIHVHDVVKATVSTSLNMGFMWADKFFGYGITPVEKRDEWHDHLPINGYDNTIGSNYKYG

>8658254VS 8658254

MAKSHSTVSRDFMKAVGLGAAGVGGAVASAPLFDHLDLLELSEKAVWKRWPYVKEREIDNPTLEVDWKTWSKPFDCGFLSWKDKPGFSYDQFNNTVENYC  
KAYWPEWKGYTLRDHMYEAFQAVRSHLANGLTQGVLPWKPARSPQLGFSNWQGTPEDNLRMIRAALSFLGMGPVGMIDLPKNSRTRNFVYDRARGIKI IW  
KEGIEKNYKENDTHYIPVSHRYAIVSYNPESELLMRTPHKLAGAASFSYIRTAQAKAMTEAFLAALGYNCFYAHEYQPAAPFGIFAGIGENARMGQTI VS  
PDFPYGRTHFVVYTDLPLVPTNPIDAGIPRFCECTCGCAECPVGAISEKNVGMSPYDMATPLQRWGEDWNGNIPGYKGRWCDTWKCDGPCQSCRGSCPFNSV  
ADGSFIHGFKVATVSTTFLNGFTFANMEKFMHYGKADKDPESWEDDASRWYGTGHSALFTGGN

>8658261VS 8658261

MSIFHSTLNRDFMKALGLTGAAGMTI AASAPVMHDVDELLASAEDTEIKHQNPWVVKERYFNPTVPI DWDLKWRVDGRNARLYNVQDSKWYFNAYSETQA  
KIYAEYAENEDPEFKWGDPRRMALEAGCSFAQFGLTSSGTYSLSHSLGNPPTKTPETNGYAKWVGTPEENLLLLLGGAVRFFGGDDVGMVEMHDTLDRVLC  
TYDMNGYKNSFEDIDEPYQTSQPKVTGIPNSYKWCFTWTLRQPMVDVTRQGGIMRAYPNYKNGYEAESVGVWRAYSELAIENRQLFLRGLGYRGIAGGM  
SAITSGNAIATVAGCMEHARMQVAVHPKFGSTVVRGYKMMTNFLAPTKPIDAGIYEFCKSCQICAEHCPTGIIQKSDPTWTTGRNPDGNDNGTDFGEPLP  
YQAQGFEGWRTDIGKCPHCPCQGTCPFNELPNASWIHTLVKATAANTTLFNSFFAQMDRNFKYGRKPYIGFWDDFGTRPTYDMDTTR

>8658265VS 8658265

VSQFHSTLSRRDFMKGLGLASAGLAAA VSPVFDHLDLDEVTSAGKVLRLKLPWYVKERYDPTFPIDWSQVKKMQDQVNTAQHYSRSTEADAIYAREHKGEL  
LRDYITKMFNPWQPMKTS DGNVALSFLPGFTTRDFAMGEAVGTRRGGFMSYMYNSIKKTDWVGIQKAKTPEELGIPRWEATPEENLNTLRAFARFIGASDV  
GVFEWTPNTEKFLLEYDYGAGTYVFEVDKGYEDSTKFFVPRKAKWVIVWMAEPTETAIRVPTSHGAASTHACYTRMPTLSIQIQEFLRGLGYNGYSSYQS  
YNYGLGPTSPHGMVAGVEHGRMCKVVI SPGEGSTLRGMNRLVTDLPLKPTKPIDFGLYRPFCKTCKCAESCFCVFNALPFGDPSWADDFYQPTGFEYRIVTR  
LCVFCMACQAVCPFTEHLGSIHQVLVKFTAVNTTLFNGFRQMDLLFGYGMKNPESWDDQYNEPVDGLHPTY

>8658267VS 8658267

MAHFHSTVSRDFMKALGLVAGAGALGAASPIFRDLDEVTSASVKDPYARWVWKERDFEDITTPIDWNVFKAYNPATHTPTSEFGPGGPVLSARKVRQL  
DGVVNWPGSTLDRDLADGATGGNYSNGKQWDGAGGTSPPSRGDGTRSAPGPWQGTPEENLQTCRAAAHFYGSPRCGAIEINEKTKKLFNSNVQWADIDKGT  
YDDKTDIYTI PNKCRWVWLVTKQSFKNQYI TRSDPDDPWPKNVFRQKAGENQAYSHAPQIRYQVNRFI TGLGYQCLKPSASGNVQFVGFAGLSEMGRA  
MTIEPSYGMVRYIDFAITDPLAPTKPIDAGLRRFCHNCGTCAKVCPSGCQSTKEDPYWETRDYTSNAGLQTYI DWDKCIRWGGPWCVCNQCSTCFPNHP  
TDAIVHPFVRSTAATVPLFNGFFASMENSFGYFRQLSADEHEDWRSRDLSSWKYDITLLGFGNPSW

>8658269VS 8658269

MSKFHSTVSRDFIKVLGFGAGLGTAMAATPVFHDDELNTIARTNPLNKWVKENDYEELETTVPDWNIFQAVGYQGRANTVSVKSEVSAKYNEDETRALYQY  
GIDNKVPLSLRDMALSFARGCSPSPVWDGAPALTLGNIGNNSTPFGKVTYSWQGNTEDNLMCRAALHYGSPRVGVI EVNEHTKRLFNWGVKVIWDSVV  
GNIDKSGVQHVPESCRWILVYVVKQEQAMQNLFGTGEMEAGGLVNDYAGVTNPNKISNKSLLGASSRAYAEGPAIQYRIMRFIKALGYQAYDPTATANVPFG  
VFSGLAEESRSGQSLSDYDGI FLRYMRI VVTDLPLIPTKPIDAGLTFEFCVKCKCAEVCPSGGITQADDTSWEGTGPWPVNGGNRIIGFKGWFLNWQTCADM  
GNPWNCTQCQACFPNLSLTDASVHSIIRATAAITPVFNSFFATMERNFGYGMKRSADWDRDLASWKHDSLFGFGTAGW

>8658272VS 8658272

MMRRTHSTILSQRLLKRFNFEDMVTNTRIYRDLDELKSSDLAIEKLPWWITHKDFWDFTEIDWSIQKPFMHTPQNYOHLTPEQITQYNSRLTEVMEWKKT  
SKVLGFTHRDYAMKRGADITSLPLNLAGIDENGKSVLYWTGSPKLMDDITPTPEDMGCPKYEGTPEENLRMIKAFKICGASKVRAVPIDAKFKSVQPKFYAP  
NVPLVYVESVDKPYSTENKRVIPQKMQWAVFSTQGGNLTQAQGNWIGSLGAAIYSGGSPDFIQIQAQRFLKILGYNSIVSGISYNLQSWPAMGVASGMGEL  
GRIQISISFPFNCDRAIRCIITDPLVSLSQPIDAGITRFCKICGCICANICPVSAINSNPEPSWDIWSSDPSNPNLKPFLFNNPGKKTWYLGHHLCSIFGRDA  
NDSKCGLCMINTCFHKSNNQV

>8658274VS 8658274

MEELNKLKSRKFMKGLGVSSAIAAGAVLTSATVAAAEGGIDPGEKLGHAHDAYDSSIKRVL PANFYKEIETRSYIGTTKIVDPGNRFDARQHGFAQISA  
CIGSGDFVSEKSWGVLQKFAAKQFQSEISAELEKEDYVWVSGALTNMMDAMHYTLRSGNFDSPISGNKLTLSPEATAKIKKLAYWIGLERVGI CEITE  
DLKPYFYKRTTGLTKVGVPAAGFKVDGIDVPPWPFYKYICIMADACDYNAGRGLRPLVEATGKTS CMVSDFPAYQMETIIRSLGYDAKANAICDTATMSEP  
LAVQAGLGLGRSGLVSPWGGNFRLTECFNTLPLIPDKPIDFGLQEFCKVCKCAVNC PASAISIDDEPSEVVKASKF IGWNTDSYKCLTERIVHGCTCQ  
AICPWSKPDTHIEIGRTIQNKAFAPFLVKLDDFFYGAKPEGLDVPTWAPWR

>8658278VS 8658278

MNKFHSSVSRDFMKGLGIASAGLAAAAAPVFDLDEAVSAPVAGGFRPWWVVKEREYEDPTCEVDWNQIERSDNSWIMHGVRNGVGGYLFAGQKYLW  
QKEGSDRAFTGVKNNEPGFTLRDMALLEGASPLMLGNKVSVFLPEINQNEVLAQFGFTA AAWPNASSFWVASAPDFWGVPKWQGTPEENSRLRSAMRF  
FGASEVRFaelNEKTKLIFTHHVHTPIVFEVDVDRAYEAVAGQKFLPNKPLYISVAIQMSKEMYRQGNAGIRFAANNMRYRLNNVQVATQSFGLKIGYQ  
GIGYPSSELFHGMMPQADAILTGFAEMARNNNYCSPEFGTVAGYYSILTDLPLAPDKPIDAGYFRFCHTCRCAEACPSQAISYDSEPTWEIPPSAIDPA  
KETKYSTPGKVFHTDSPACYSRWIGLHGCA RCMGTCVFNTNGSAMVHDMVRATIGTGVFNGLWADKAFGYGLIPPEKWEWWDKDYVVLGQDSTIGSY  
YGGY

>8658285VS 8658285

MAEVNRRDFLKAAGVGAAGI GVAAGSYWNSYHEGQSAFMSQGEHRQGEHYFNREPRFVVKVTPFSWEVIGPDLNPNHNSVGGIHRIDMRWYGERFKSAGH  
AVAGSNPAVGYDLTKGDLAMPNTWPSNGLAGLSTFYQEYDLYPMMVDIDKEYKYDWLPQLVERFKASIESRANFNANEGLIAMARSEAQRVAVPSSITAP  
PEENDWGSVARRAVFDSPELASQLIKRMAADL GATFVGVTPLNKGWVAYSHAPLGLGGGTGGRFGINTPIKIPPEWWDNALVVTGMSWVDNAGDPNYGD  
SWTGYNISQIAQOMVKFLKYLGYPARWHSPPGGYDFVPVPIAECGMGEIGRTSNCLAPDFGGNVRPAVITTSPLAADKPVDFNLAEFCSRCKLCAQVCP  
TQAISYDDKPKFEIYGRFRFNTNLA KCRDGNL GAGMPGCRACISVCPWTKKNTWVHRFVREVLSHDGTGASQNVAIWAERTLYPKNYEDALNPNPKYGVYE  
PPKWIKTNEYVSSVFNTPMGVK

>8658289VS 8658289

MNQFHSTVSRDFMKGLGLGVAGIGAASATAPVFDLDEAASSTKAVLKRGVYKERNYGDYGIEIDWNIMKRDRQGFPPNWNFGVTMAYPEGPQAFALK  
HAGEATAEKAEKFWPDYKGTPTREALGSAFEAMSYGNSGYCGLNVQGGTSTNLPARHPEIIGMPKWQGTPEENLMLIRAVFSLVGLGPMVGVVAELNEQTK  
KFVVDYMPFQTSARASTGNLLPAIPATAGORRIIFDDNATESYLTEDPPAFHLPSAQRYVIATHNLSCDEIARRGLGAALGGCTENMSYARVAYAKNIVEQ  
FIRGLGYNVSYGHDMQPALAWDIASGVGEHARLQGTIGSPEYGLMRTAIFVYTDLPLALTKPIDAGFTKFCCTCGICAECPVGAIPERGINRSDWNNCGQ  
NWADDKMEGGTQVMFNLPGYKGRWNLKFCAYTPCGGACKGNCFPNTIADGSFVHSIVKSTIATTLFNSFFTSMEGILHYGQDKDPESWNSPDEWHIYG

THPNLSLRQ

>8658296VS 8658296

VFKFHSTVSRDFMFKGLGLVAGIGAAATAPVFDLDEAASSPKAVLKRGRWVYKERDYGLDITIELDWSLIKRRDLRGSYNWDFPPTLMFSYPPGGPQAFQOHL  
HDQATAVTAKAKEIWPNYKGTPTTRDYALSNSFWASAYSNSGYVLANAQGMKTTAPAPRPQDISMPVWQGTPEENTAMIRAVFSLVGLGPMIGTMTLDEKQ  
NFIWEYNGKGVTDGDPQYGNKRII IDPDI SESY SNTSFH IPTSHKYVIA THNLSCDEYI RTGLS GAGPYGTEEMSYARVAYAKS IVEQF IRGLGYNVAYGH  
DLQATPWDIWSVGGEHCRMGTITGSPGLGMLRTHAVFYTDLPLEITKPIDAGFAKFCETCGTCACTCPVGAISPRGVDNRWDSNCGQDWDANDKQAGGNEV  
MYNMPGFKGWRCSNFCACFTPCGSACKGNCFNTIADGSGFVHSIVKSTVATTPIFNSFFTSMEGVLHYGKQDKDPETWWSNPDAWHIYGTNPNLHQ

>8658300VS 8658300

MNQFHSTVSRDFMFKGLGLTASLGAAGAVIPQFRDLDELASSAKVTNKRGRWVYKERDYGNPTVE IDWNLMKRRDLRGFANWDFPPTVMMSYPPGGPQAFHANL  
EKNTAVTEKAKEIWPYAGPTIRDKALSSSFWASAYGKSGFCRGLNQHGMPPTSPAPRPSEINMPAWQGTPEENAAMLRAVFSLVGLGPIVGTMTLDEKQ  
NFLWEYSVGWGTGNSSGGNKHIVLSDITESHYMDATSFH IPTSQKYVIA THNLSCDGLRRLSLSGAGFAGTEEMSYVRVAFAKA IVEQF IRGLGYNVYGH  
DIQSAVAWDLWSGLGEHCRMGTITGSPGLGMLRTHAVFYTDLPVPTNIDSGFTKFCETCGICAEICPVGAIQERGINRSDWNNCGQSWDDKQVGGTKL  
MYNIPGYKWRCSNFCACFTPCGSACKSNCFNTIGDGSFVHSIVKSTVATSPFNSFFTSMEGVLHYGKQDKDPTSWWNSPDEWF IYGTNPNLHQ

>8658303VS 8658303

MSKLHSTLSRRDFMFKGLGLAGLAGAVAAAAPVFDHDELTFSGSNVNRYPWYKEREFKNPTVE IDWNVLARQNNANFKSHKPTPADYDAAGVVRGYMYD  
LETPAEALTYDYCEKFLPGWKGWGGSDVVRTALDNACKFMMGMWPGEMYQGGKRINVRNAI IAAGGTGSYSSFLGPQCF SIRPQDVGAQKQGTPEEN  
YKTVRANFRFLGAQDVGCAEVDSDTVKFFHKAKGGASGMFAGQDAGGQVAFKIDIVPYETGDEYAI PNKCKYI ITPTARQSFEGTRRQAGITEGFAVWYS  
YARYIKMMCHMQEFIRGLGYECLNMSGLCFSNPLSAITGLGEHGRMSSPTIHPKNGTTRNRANGWAFLTDMPITLTKPIDFGAYKFCETCGICADSCFPGLIQ  
KGESTWENPAASGNLGAQOQFRGWRDNTVCKPHCPTCQGTCPFNSTQSFIHDMVKVTTTNI PVFNFGFANMERFMEYGRKPQWFEWDLQOPTYGFDTTA

>8658308VS 8658308

MIKKHSTVSRDFMFKGLGLAGAGIGAAAAATPVFDHDELMSAQTALNRWPYIKNREFDGI ELDWNLIKRRDLSHYDNWMTNYPFQFPGGPPALMAGL  
ESAACKNSDKLKEWLDYASTRDLALANALGSVGTFTGYALNTTQGGKVAAPAPTPEELGIPKWEGTPEENLMIRAAFSVMGLGPMVGSSELEKTKNFV  
YEYTDGSDTWLPGQGPSEHVIFDDNISEFYRTQNPNTLHIPSSSHKYVISTHNLSDDELTRTYSPGLTPEAESISYRVAIAKNFVEEFIRGLGYHVYGHAL  
QALVWDLFSGVAEHSRGNQAVSPEYGMRRTHATFYTDLPFLAFTNPSDAGLTKFCETCGICADACPVGAISPVGIRGNWNNACQDWDANDIQNGGFTMY  
NIPGYKWRCDTFTCVTTKAACGAACKFSCFPNALHNGSFMSHIVKATVSNSTSLFNGFFRNMEETLKYGYMDKPESSWETPEAWYVYGTNPNLSLRQ

>8658312VS 8658312

MAQFHSVLSRRDFMFKGLGLVAGAGAAAAVSPVFRDLDEMASAPMARVNMPWVWVQVNETTTPIDWDVLP TLGPAKYGPPMGLITPAYPESEIHRMKMDRI  
LEKYPNWEKGASTLGFPGTSDADPEYDYIGDIKDNALVMGAALLNMGMPTELEIMATHGAYMGLTDHPEGWRIMPPEQRGGTKWQGTPEEALKIVRAAVRF  
YGFDDVTAIPVDDHFLKVMFGEKWLITHGAPTTFEFGDVEDDICTPAIRPTKIVIPRRMKWFLQFSSRQPGEVTRHALGTTQAGQSYYYTSWVKIVKSIQD  
FLWGLGYISLDCNCRGAPGTGATGILAGAGELARWGGVMTPKYGISVRVMHGVLTDLPLEECKPIDFGGREFCCTCGICADACPMGAIKSKDEPTWDAAKPYQ  
YGGYLTWRDMDAVCSHCPVCGQGTCPFNADKSGIHVLKGTVSTTIFNSFFTTMDSKFDYGRKPPAEWWDSEQVPTGIDTIS

>8658318VS 8658318

MSNFHSTLTKRDLKIGMAGAGLGAASAVTPMFHDLDELVASTPSTRNLPWFVKEREHGDP TTP IDWDMIQRRPYTWARMDP TLVYDNLKAI GAPVARWL  
DWEKKADEILYAKAREEFPGFEPGIDGFGDIRTTALTHASEMFAFGQFPQRMNLGGMVLDLVAAVRAAGGVLGSDTSYAGPKMVHTPEEMGGTKYQGTPE  
DNLRTLKAGIRYFGEEDVGALELDDNKKLVFTVDQYKGTLEFGDVEECIETPRKVTIPNKCKYIFLWTRMQPYEWTRRQSGRFEAGATEYSYERAYNTKHA  
FQDFARGLGYQMSAGNNSLSPAGAWAVLGGELGELSRASYVNHPLYGIPTVRVWTFGLTDMLPPLPSRPIDFGARRFCESCGICAEACPFAGAINPGEPTWRDDN  
TFGNAGFLWRCDYTKPHCPTCQGTCPFNHSGPSFIHDIKGTVSTTIPVFNFFKNMEKSFYGRKPNATWWEVDDYYPYGVDTSY

>8658324VS 8658324

VKTFHSTLSRRDFMFKGLGLVAGAGVAAAPVFDHDEL TASSGGVQKLPWVWKERDFKDPVSP IDWQNLPKLEGTFPYQARPTLTAQERYAMGIPGGSSG  
VWASPEQAQVLFYDMKKEFPGWEPYAGLGDHRTTALFMAFKMRMGMPGEINMGGRNVNLQAILKAGGTATFPFLGLRSSETLRPQDFGVPRWEGTPE  
ENLLTLRQVVRFLGGCDVGAQELSDVFKLFHEKSGGKQLVIENVDEAAETATKLVIPAKAKYILQWTRQPYESTRRQAGEYEDAAVYYSYQRFVFGAII  
QEFHAMGYTAVSTHMMGYHTNAIATLTGMGEHCRMSSPTLVKPYGTTRNAMWVIITDMPMLSTKPIDFGVYDFCKTCGICADSCFPGLIEKGDPSWEANQP  
GSRPFGNWRNTTTPHCPVCGQGTCPFNHSGPSFIHDLVRNTVSVTPVFNFFANMEKTMGYGRKDPDRDWNIDDYTYGINTSY

>8658327VS 8658327

MPNFHSIVSRDFVKALGLTGAGIGTVAAPVFDLDDV TASPNAEWRKPWVWKQRELD DPTTE IDWDMYRS DGRMVGVQVRSVQIKYLGEEVNRNNAV  
TKFTSDGLKNNTPLRLRDLAALAGVMSMLPMAMQIPSMFMGSTATPEARGVAKYQGTPEANSRMLRSALIFYGAAQVGYGEVTRQYKDKLFRTPDKGN  
AATAYQGAWPPPLTQCKQYFEDVPVGYETTEKMFVPSNVLYEFTTAVMSKEMFRCSPPSALQNAANLSRYTMSQIQPKIQAFIKSLGYQCYGYTLPMN  
GAVPTIASAILTLGELGARNVGFANNPEFGSITGLFHLITDLPLEPTPIDAGMWRFCCTCKCADSCPNWAIPTDHEPTWEIPKLYGQEDTTHVPGKQKQF  
TNSVDCWLGRVQLGTCGACMGCTCFNTGKNAIHVYKATLSTTIPVFNLSLWQADKAFGYGLREGEDLENWDMQPIGGFDSTCGIQGGSY

>8658346VS 8658346

MSRFHSMVSRDFMKAVALGAGLAGASSAISPVFHDVDEFISSPTAEWKRWPYVKNRELEDPTVELDWSLMYRSDGIWGTQNNPTQDFLGAEEGAKRRAA  
AAYSNAVKTNSGMTRDLRALSSGNMYPIITFMGPTSSSTPESELGWKQGTPEENSKMLRAAMHFGAAQVGMAEITDLVKTKLIREYDKDAHKKYIFE  
DVPKGYEGSKLVFPDKVQLYDFAFTHPLNKEMFRSSPSSDLMSAGNSMRYQSFSIMQPRVQTFMVQLGYTCYGYTRPFNGAIPTIATATLTLGEGARNNG  
AFISPEFGPCVGLFSLVTDLPLEPTPIIDAGMWRFCCTCKCADECPAQCSISHEEPTWVVKIYKEDTTHIPGRKQFWTDGVAWCSYKATIGCGACMGCT  
CTFNTDIANIHSFVRATLSTTIPVFNLSLWQADKFFGYGVHENKEAWWMSQPTLGFDTAHTVMGKDY

>8658352VS 8658352

MKKFHSTLSRRDFMFKSLGVVAGLGTMSAAPVFDHDELDEV TSSAIGINKNPWVWKERDFKNPTVP IDWSKVTQRGVFQGLPRPTVADFEKAGVIGGTSIDL  
ETPEMALTYDAMAKEFPGWTPGYAGMGDVRTTSLCNASKFMMFGAWPNMMEGGKRVNVI GAIMAAGGSPTFPWLPGLDPTTRPQDFGAPVWQGTPEEN  
LKTCTAIRFFGGSDVALELDDDDILKFIHSQIGKDVVVEDVDEAYETATKMWIPRCKWVLMWSARQSLGTRRQAGITENFSVWYSRFPKVGAAQFQE  
FIRGLGYQALNPGMMLRDLALSGMGEHGRMSSPTLTPKYGITTRNAMWALITDLP LLPTTPIIDFGAYKFCCTCGICADSCPNWIIQGDPTWENPASAK  
SGIQQGTPEGWRNTADCPHCPCTCQGTCPFNKSPDSFIHAVVKGTVANTPLLSNFFTNMEKAMDYGRKDPPEEFDLNDFTYIGDTSY

>8658355VS 8658355

MSKFHSSLSRRDFMFKGLGLAGAGIGAAAAVFDHDELDEVASADSSVAKRPWVWKERDVKPTIEIDWSKTSLSLPPQEGCHLPLLLADFGWDRVNAAMAQGV  
ANLNAKKTGSREASISLDTSMQEAAPPHFIAHAGWKEPVYPALEGAAPPELVGQTYTHESFGVPRWESTPEENFALLKSAMRFFGAGQIASIELDNNVK  
SMFYVVDASRMFNGPPMAYGFEDCDNGYVTDTHFIIIPNKARVVVYTTTTPMPKEMRYTAPSGVCYANMSRYRLNQEETMACVQKFLGLGYQGLQSAWPNG  
ICPSPAVATLSGLGEMDRINQCVIPEEGAVVGYKFIITDLPVSKPIDFGAFFFCHSCRKCADTCAKAI SFEETPEWEPAGPWSISGKKAYKNEPECKL  
YQHSTGATCQICTGVCFVNNTKAMIHEIVKSTLSTTGIFNTFLWKADVAFGYGHDAEAWWDLDPRYGFDTTMGVDRGGYK

>8658361VS 8658361

MALRRDVALWKNRFLRGLLEEFMSKFHSMVSRDFMFKGLGLAGAGIGAAAPVFDHDEL IASDVAQPRPWWVKERPIDDPTIEVDFSMERHDGRNQ  
GQSARVRAIYGGADRVLGAALSAEALERTASNYPGYTYRSRALAGSFRKVSQGTSPGWAE TKDPAPVKTPEERGE PKWTSPEASRMLRAMRAYGASL  
VGYTELTOEHRDHVIFSYEKGDSNNEKYIGTTPVPTAARPIVFESVPKAYETTEKLVIPNVPLWEIALSTQGSNELWRSAGTLLGGMANANTFYNCANLHAS

TYNFLRGLYQLIGTIGNDSRYVGESEGAAMAGLGEASRQKLYTLTPEYAGPGRLYGVLTDLPLEPHTP IDAGIYRFCHSCQKCADSCPPQCISKEKEPSW  
DLPLTEGKETIYSVKGTKAFYNNLPLCRQYSNETSHGCRICWGECTFTVNRGALVHQI I KGTIANVPLFNTYFYKLGAAFGYGTDPKAEATWWDLSLPTLGO  
DSTIVAADAGYKG

>MB\_mbrA 295311051

MKEFHSTLSRRDFMKSGLGVVAGLGTISAAPVFDLDEVTS SAIGINKNPWWVKERDFKNPTVP IDWSKVTRQMGVQSLPRPTVADFNAGVVGSTDL  
ETPEMALTYLDAMAKEFPGWTPGYAGMGDVRTTSLCNASKFMMFGAWPGNMEMGGKRVNVIGAIMAAGGSATFTPWLPGLDPTTTRPQDFGAPVWQGTPEEN  
LKTCTAIRFFGGSDVALELDDDLKFIHSQIGGKEVVVEDVDEAYETVTKMVIIPRCKWVLMWSARQSLGTRRQAGITENFAVWYSYSRFPKVGAQFQE  
FIRGLGYQALNPMGGFLANPLAALS GMGEHGRMSSPTITPKYGTNRAMWALITDLPPLPPTPFDGAYKFKCTCGICADSCPPFLIQGGDPTWENPASAK  
SGIQQGTFFGWRNTADCPHCPTCQGTCPFNKPSDFIHAVVKGTVANTPLLSFFTNMEKAMDYGRKDPPEFWNLNDFTYGDITSY

>MB\_rdhA5 193876548

SRRDFMKRLGVAGAGLGTAAATAPVFDLDDV I SSPNAEWKRPPWVKYRELDPTTE IDWSLMNRWDARQTAQAPGISAKYLVGDEVNKRKANVLTNKNVAI  
TNNTPGQTLKDYALSSGSGYFMNLPYMTTFMGPQKVATPQSINVVWQGTPEENSRMLRSVIFYGGQVGFVGDQIKDKLVFTNHKGAANSIGFIENFP  
PPPALGKSYVFDVVDVGYEGDTKFLVPSNKQLYEFCFTVPMKDMFRANESQIMYSANLSRYRFLFGNIQNCIQEFIRSLGTYCYGASPFSGMMPAIASAQ  
LTGITEGNRRNGFCTSPYEGPIGVFSLVTDMPLEPTNPIDAGIWRFCQCTCKCADCPVNAIPKDHEPTWDLNPIYKADIVHSPGRKQYWTNAVDCWML  
TEYNGCGACMATCTFNNTNAP IHEIVGATLSTPALNSFLWQADKFFGYGLHEDKEAWWDLPLVYGFDSAATS SHGGYNK

>Dhaf\_0689 7257656

MKGLIRLADSSKNQNTSEQKQLSRRGFLKTGAAAAALGVLGAVKAPSKVAAAANNYIYIIPGKQWSKLRPKPNYGGASVRLAEHNDQWLGTSKIVGTVN  
KSKESDMGFTLAMEGLKGPKAQAGFYITGLRHPLSDAMGMAIAPISDTMWEVGHTRPEKLPIDPPEQMSMHIKDVAYYLRADVEVGNMPEYAYYSHMQPS  
MIGVIAGMVPKGTFFEDVPEEKLPIYIVVAEQHLETYLASTYGDIGSDSQFRSYHATANIALIIAQYIRGLGYHARAHFHGNYGAVMAPCMIAAGMGEL  
TRTGDTVAHPRMGYRNKVAITDPLVDPDKPIDFGMADFCRVCKADNCPAEIATHDKDMVEYNGYLRWNSDYKKAEPFRAGNDEKVCSCGRCIKVICPWS  
KEDSWFHEAGIWWGSKGEAASKLLKIDDMFGYGEIVDKHKWLEWPELYKFDY

>Dhaf\_0693 7257660

MSSALLFKVGSFATSHIWEPELPGLTPEYQTTPEEAAQTVKMAAKHFGASVGTCKLNRNWLFSHRYHNENWTKDAKDLFTKVFGLKGLLPVMTPEERK  
TLQLPHVDDLEPQEMNNVVCGIEMDYEAYRRLTSCVEVAETRYASFDKFLIMHLALFINYMGYRAWPFGSYGPGGLGIPMAVDAGLGEMGRNGLLINPELG  
PRLRICGVIDTMDMPQDPKPIDMGVAKFCETCAICADNCPSESIKDNRRTAEAVENTNYGVKKWPIDASKKAYWDDHNI SACGNVHYCPYKPNPTAMHR  
MAAHMAPVLGSAALVKMDETLYGSEPKDVASWQAQNPKNKPHRSTRK

>A2cp1\_0353 7296457

MTKTDRYVLWLGIGAVWALDLATFILTDFHIYAFALFVIAALGFVWGLRFQVTEPMRRAALGVTFGWTVAMALLFAPWPIDPKPEYIVGEVHRFSEMEHG  
FSRVLTVGTGPNIAAGGLVYGDPAQOQSMTEWGWPNPFI SGYPLARALFGGTILMERLRGATTIGGEPANPLRYSWNSFQGEKRDKGLWNGDLLLLGEVA  
KAMGSAKATYTPHENTLMVKIASWLGSPRIAAAVDPRWFYSHDLSTYGTPLPKDAKDLKYVIQIFTDQDWRTRIHNDAGTSWWSVNSGQAYSTSAWIGI  
RMAQMLRDMGYVARVGFQGMNYENIETPASVSYGIGEYGRSDAVVPTAGGLRFKSAITFDTFPLEAGDPKQGWGITRMCANCDRCARACPVNSVPMGEPTV  
ENGVNIWQVDKDKCTRVANRLLVWLDLGLYGRSAFRLRDEARNALGAPGEAPRPAAGFPPEARSA  
FPYQVQYIYTERDRSKNEEWASGVDPKMGKVLGYSYKGTWTKIPDRLLDASGRNRNVHWDYEAAGLPPNLPGLKLTPEEATALLKEGKAFSGASYSRDD  
EVFPDRPKYEKQKLSYEQAARMWAEK

>A2cp1\_0355 7296459

MALLAVGTAAWTAMTSAALVEREWRTWISLATALGCAALGALLAKRRGALEGSRARWTLRGVGLAALLALALVIPSDRSFPDKRVGAATPTQAYDAT  
QPGNDVLGKVERS RGPDRDELTF SVYDVCVGVVAHRAARDGSAVPAVEVTEPAVLAQAQKDEARALGAQVAGITELHPQVVFQKDNQDQPVALLHRYAIV  
IATGLDYRLASPSAPLPWRDYSSIP EEAVALSGRSTNPAVPIPETVQYERDTELEFYAEGGRVAVELAKAIRSLGYPARAHFGRWAEVQVVIPLAIAAGLG  
ELGKNGMLINDRFGRGSFAVVTTDIPLAVDRQRLGVQEFRCVCKCADACPVSAVPRGEAGAPAGVSRWQVDPKWCWYTKINPKCMACTGACPFNKD  
LLAHRWAVALIARKSVANRLLVWLDLGLYGRSAFRLRDEARNALGAPGEAPRPAAGFPPEARSA

>AB194705 76573854

MENNEQRQQTGMNRRSFLKVGAAATMGVIGAIKAPAKVANAAETMNYVPGPTNARSKLRPVHDFAGAKRVFVENNDEWLGTTKII SKVKKTSEADAGFMQA  
VRGLYGPDPQRGFQFI AKHPFGGTISWARNLIAAEDVVDGDAEPTKTPIDPPEQMSQHIRDCCYFLRADEVGIGKMPYEGYTHHVSVDTVGLMSKPVVEEC  
TPVTKIYPNVIVVMIDGIE TMWASTGYDGISGAMSQSYFTSGCIAVIMAKYIRTLGYNARAHAKNYEAIMPVCIMAAGLGELSRGTGDCAIHPRGLGRHK  
VAAVTTDLPLAPDKPIDFGLLDFCRVCKCADNCPNDAITFDEDPEYNGYLRWNSDFKCKTEFRTTNEEGSSCGTCLKVCPWNSKEDSWFHKAGVWVGSKG  
EAASTFLKSIDDIFGYGTETIEKYKWWLEWPEKYPLKPM

>AB194706 76573857

MDREKENTLDQKEEKRSVGI SRRNFFKASGIAAGVAALGLVTKSPVYAGQESESAIVNFAVQEVDPQSPYNLPPFANAENLKRYELGKNFYSKELSMDFK  
GNPWHIEAEKYIVKFIKEGVPYSLMDNIFYDAAWASYKGTPLFSWEPLGVSNIKRAETVKGWEATPEQNNRYIKKVANEYSGDGTGAVLNEQWFLSQDEK  
GKPVVFSSTHESKPTITEEAYI PKTMNRVIVMLAPMNPMLKYAPTTLSEATVGTSEYSQMAESAGKMAEFIRGLGYNALPMGNDASLSVPIAIDAGLGELGR  
HGLLVHPEYSSVRISKVLTDLPIAPDKPISFGAAEF CRTCMKCAEACPSSESISKDKDPSDKVACASNNPMMKMYVNTWTCLNQWVWENGGGNCICLSACPY  
NKPKTWIHDVVKGVSAKTTVFNSTFATLDDALGYGTHDKNPEFWDSDKNVPKW

>ACP\_0433 7699567

MSQPTHPRRPRGTWPKPETALLRVSGNPINGLGETAARRPSFFFWHSPDQHPWGLQIVARQSSRSCPGSTEAFAAYNYPELQPVAVRNPRTEAELS  
QQVSRFALSHEADDIGIARMPLVYFEGYVTEHPWVILALAHDYERLREVPDTEINGVGVCDVGDQYARGTRSSYALANWIRSQYHADPYPGPSAGALLL  
IPPAIAAGLGELGKHGSMIEEPRFGSGVRLAGVSTDMPLVPTFPRRFGADEFCATCQICTHACPPGAI TPQKQMVGRVERWYVDFDKCIPFFAEASCGICIA  
ECPWRTPSRPKLLQTMARTGQK

>Adeh\_0329 3886157

MTKTDRYVLWLGIGAAWVLDLAVFILSDYHIYAFLLLVVAAVGLAWGLRFVPTAKLRRNAALSVSGFWTVALVLLFGPWPVDPKDYIVGEVHRFSEMEHG  
FARGLTGVTPGNIAAGGLVYGDPAQOQGHMMSEWGWPNPFI SGNPVSRALFGGTILMERLRGATTIGGEPANPLRYSWNSFEGEKRDKGLWNSGDYLFGEVA  
KVMGTQKASYPRENALMIKSLAAWLGSPKIAIAAVDPRWFYSHDLSTWGTPLPKDAKDLKYVIQLFTDQDWRVHNSDGTSSWWSVNSGQAYSTSAWIGI  
RMAQVLRDMGYTARVGFQGMNYENIETTVSVSYGIGEYGRSDAVVPTAGGLRFKSAITFDTFPMDVGEVNVGWGITRMCANCDRCARACPVNAVPMGEPTV  
ENGVNMWQVDKDKCTFRFTGNLNGMCGACLA VCPYKNDPFFHRVNGYIIRHSP IATYLFNGIHGVGLEDWDLDFEYSSEAGPYNVSRPARWIQEDPGWAK  
FPYQVQYIYTERDRSKNEEWASGVDPKMGKVLGYSYKGTWTKIPDRLDANGRRNRNVHWDYEAAGLPPNLPGLKLTPEEATRLLEGGKAFSGASYPDA  
EVFPDRPKYEKQKLSYEQAARMWAEK

>Adeh\_0331 3886159

VRWKARELGCVALAAAGAVAWAAMASALVEREWRTWISVGAALACAATGLVVARRRGALDGA VPRRVLRAALASAVALLALVLPDRSFPDKRVGAA  
TPTTEYDASTQPENLVLGKVERTRGGSEDELFTTVYDVCSGKVAHRAARDGAPAPVAVEVTEPAVLAQAQKDEARALGAQVTGITALHPQVFRKNDGRP  
VELRHRFAIVIGTGLDYRLASPSAPLPWRDYSAIPEEVAVALSGRSDDPAVPIPAEVIQYERDTELEFYAEGGRIVHLAKAIRSLGYPARAHFGRWSEVQV  
VPLAIEAGLGEVGNLINDRFGRGSFAVVTTDIPLAVDRQRLGVQEFRCVCKCADACPVNAVPRGDAGAPAGVSRWQVDPKWCWYTKINPKCMAC  
TGACPFNKDLLAHRWAQAL IARKSVANHLLVWLDLGLYGRAALRLRDEARRALGEPAAAPPQAPDRPQAGGGASAPPEARSA

>AF022812 3002550

MEKKKKPELSSRRDFGKLIIGGGAAATIAPFGVPGANAAEKEKNAAEIRQQFAMTAGSPIIVNDKLERIAEVRTAFTHTPSFFKPNYKGEVWPFLSAYDEKV  
ROIENGENGPKMAKKNVGEARAGRALEAAGWTLIDINYGNIYPNRFMLWSGETMTNTQLWAPVGLDRRPPDTPDVELTNYVKFAARMAGADLVGVARLNRN  
WVYSEAVTTPADVPYEQSLHKEIEKPIVKDVLPIETDDELIIPNTECNVIIVAGIAMNREMMQTPAPNSMACATTAFCYSRMCMPDMWLCQFIRYMGYYAIP  
SCNGVQSVAVFAVEAGLQASRMGACITPEFGPNVRLTKVFTNMPLVPDKPIDFGVTEFCETCKKCARECPSKAITTEGPRTEFGRS IHNQSGKLOQWQNDYK  
CLGYWPESGGYCGVCVAVCPFTKGNIIWHDGVEWELIDNTRFLDPLMLGMDALGYGAKRNITEVVDGKINTYGLDADHFRDVTVSFRKDRVKKS

>AF115542 7710204

MENNEQRQQTGMNRRSFLKVGAAATTMGVIGAIKAPAKVANAAETMNYVPGPTNARSKLRPVHDFAGAKVRFVENNDEWLGTTKIISKVKTSEADAGFMQA  
VRGLYGPDPQGRGFQFIKHPFGGTISWARNLIAAEDVVDGDAEPTKTPIDPPEQMSQHIRDCCYFLRADEVGIGKMPYEGYTHHVSVDTVGLMSKPVVEECV  
TPVTKIYPNVIVVMIDQGIETMWASTGYDGISGAMSMQSYFTSGCIAVIMAKYIRTLGYNAR?  
HHAKNYEAIMPVCIMAAGLGELSRTGDCAIHPRLGYRHKVAAVTTDLPLAPDKPIDFGLLDFCRVCKKCADNCPNDAITFDEDEPIEYNGYLWNSDFKKCTE  
FRTTNEEGSSCGTCLKVCWNSKEDSWFHKAGVWVSGKGEAASFTLKSIDDIFGYGTETIEKYKWWLEWPEKYPLKPM

>AF204275 19073917

MTRSGKMEKLLKKNESKALS INRRNFLKIGAAATTAMGLIGAVKSSSQVAAAATDNLNYPVGRKSQNSKHLPEHNYGGASVRFVEHNDQWLGTTKIIGTIKPN  
NEADMGFNLAARGILGDAQKKGNNFIKHPFGSSISSGLMFIAGEEAVTQPAKEKLPIDPPEQMSQHIRDCCYFLRADEVGIGRMPEFAYYSHKTTVPRT  
KMAAAPVEEWTVPFEKHPIVVMVDQHLETTLASTYFDGISGAQSFYKHYATGNLAVILAQYIRNLGNARAHHARNYGAVMPPAVIAAGLGELSRTGDS  
TIHPRMGFRHKVAAVTTDLPLEDPKIDFGLQDFCRICGKCAENCPEAITTDRDHVEFNGLYRWNSDMKKCAVFRTTNEEGSSCGRCMKVCPWNSKEDSWF  
HEAGLWISGRGEMASSLLKNIDDMFGYGTETIDKYKWWLEWPELYKIQ

>AF259790 12240019

MENNEQRQQTGMNRRSFLKVGAAATTMGVIGAIKAPAKVANAAETMNYVPGPTNARSKLRPVHDFAGAKVRFVENNDEWLGTTKIISKVKTSEADAGFMQA  
VSGLYGPDPQGRGFQFIKHPFGGTISWARNLIAAEDVVDGDAEPTKTPIDPPEQMSQHIRDCCYFLRADEVGIGKMPYEGYTHHVSVDTVGLMSKPVVEECV  
TPVTKIYPNVIVVMIDQGIETMWASTGYDGISGAMSMQSYFTSGCIAVIMAKYIRTLGYNARAHHAKNYEAIMPVCIMAAGLGELSRTGDCAIHPRLGYRHK  
VAAVTTDLPLAPDKPIDFGLLDFCRVCKKCADNCPNDAITFDEDEPIEYNGYLWNSDFKKCTEFRTTNEEGSSCGTCLKVCWNSKEDSWFHKAGVWVSGK  
EAASTFLKSIDDIFGYGTETIEKYKWWLEWPEKYPLKPM

>AF259791 12240022

MENNEQRQQTGMNRRSFLKVGAAATTMGVIGAIKAPAKVANAAETMNYVPGPTNIRSKLRPVHDFAGAKVRFVENNDEWLGTTKIISKVKTSEADAGFMQA  
VRGLYGPDPQGRGFQFIKHPFGGTISWARNLIAAEDVVDGDEPTKTPIDPPEQMSQHIRDCCYFLRADEVGIGKMPYEGYTHHVSVDTVGLMKNPVVEECV  
TPVTKIYPNVIVVMIDQGIETMWASTGYDGISGAMSMQSYFTSGCIAVIMAKYIRTLGYNARAHHAKNYEAIMPVCIMAAGLGELSRTGDCAIHPRLGYRHK  
VAAVTTDMPLAPDKPIDFGLLDFCRVCKKCADNCPNDAITFDEDEPIEYNGYLWNSDFKKCTEFRTTNEEGSSCGTCLKVCWNSKEDSWFHKAGVWVSGK  
EAASTFLKSIDDIFGYGTETIEKYKWWLEWPEKYPLKPM

>AGWLrdhA1 198404177

MGEINRRNFLKASMLGAAAAVASASAVKGVSPVLAEAADIMAPITETSEFPYKVDQYQRYNSLKNFFEKALDPEANKTPIKFHYDDVSKI TGKKTGDKD  
LPILNAERLGIKGRPATNAETGVLFFSQHIGAMLTQRHNETGWTGLDAALKAGAFVDFDYSGFNCVSGGPGCVITPYPINPMTNEIANEPVVPVGLYNWDN  
IDVESVRQQGQWKFESKEEASKMVKKAACFLGADLAGIAPYDERWTYSTWGRKILPKCKMPNGRTKLMPWDLPKMLSGGGVEVFGHAKFEPDWEKYAGFKP  
KSVIVFVLEEDYEAIRTSPIISSATVSGKHSNMGEVAYKIAVFLRKLGYAACPQSDTGLNVPMAVQAGLGEAGRGLLITQKFGPRIRIAKVYTDLELAP  
DKPRKFGVREFCRLCKKCADACPAQAISHEKDPKVLQPEDCEVAENPYTEKWHFDSNRCSGFWAYNGSPCINCVAVCSWNKVETWNHDVARIATRIPLLQDA  
ARKFDEWFGYNGPVNPDRLERLESGYQNMVTDWFNNPESIKQ

>AJ439608 49613988

MGEINRRNFLKVSILGAAAAVASASAVKGMVSPVLAADAADIVAPITETSEFPYKVDQYQRYNSLKNFFEKTFDPEANKTPIKFHYDDVSKI TGKKTGDKD  
LPTLNAERLGIKGRPATHTSETGVLFFGQHTGVMPHQRSKETGNTLLDDALQAGVWAVEFDHGFNATDNGPGTVITPYPINPMTNEIANEPVVPVGLYNWDN  
IDVESVRQQGQWKFESKEEASKMVKKAACFLGADLVGIAPYDERWTYSTWGRKIKPKCKMPNGRTKYLPWDLPKMLSGGGVEVFGHAKFEPDWEKYAGFKP  
KSVIVFVLEEDYEAIRTSPISSATVSGSYSNMAEVAYKIAVFLRKLGYAACPQSDTGLNVPMAVQAGLGEAGRGLLITQKFGPRIRIAKVYTDLELAP  
DKPRKFGVREFCRLCKKCADACPAQAISHEKDPKVLQPEDCEVAENPYTEKWHLDSNRCSGFWAYNGSPCSNCVAVCSWNKVETWNHDVARIATRIPLLQDA  
ARKFDEWFGYNGPVNPDRLERLESGYQNMVTDWFNNPESIKQ

>AJ539533 31338099

MPRLKEYYAKHPDKLESDRAWFTKLLPNLAEEEKMKNKDMWGIATAWNKAWTSTLAPLVGDPKEWDFKGVIKEPLKVKDPKETSKLIKKMAGLFGGTLVGI  
KVNPRWILGWGGVDPRLPILAAVGDIDITPRGVRGGPIDIPDWWQYAIIVIAVPHENLIEATPLFYSPFEAYTRSGLAAARLTGFIKALGYPARYNGNPI  
IGWDELLPTPLADLAGLGMGRPGILLVTEFGSPVKLAVLTLNPMEDPRINMGLKSDCKCGICAEKYPGGSIPGQPELQDDGVVRMSDGEKCSYSA  
SVPVRHMCVGYVCPWRFRDNALHKYSRELAVRDRTGIAHQVMLWGQKSFYSPSKDDYNAPTATYKVDVPPWMMRTDMFFDGIPEGIFKK

>AM183918 115430530

MGEINRRNFLKASMLGAAAAVASAVKGMVSPVLAADAADIVAPITETSEFPYKVDQYQRYNCKMKNFFEKTFDPEANKTPIKFHNDVSKI TGKKTGDKD  
LPTLNAERLGIKGRPATHTSETGVLFFGQHTGVMPHQRSKETGNTLLDDALQAGVWAVEFDHGFNATDNGPGTVITPYPINPMTNEIANEPVVPVGLYNWDN  
IDVESVRQQGQWKFESKEEASKMVKKAACFLGADLVGIAPYDERWTYSTWGRKIKPKCKMPNGRTKLMPWDLPKVLSGGGVEVFGHEKFEVDWEKYAGFKP  
KSVIVFVLEEDYEAIRTSPIVANAATGKVSMSGGVSYKIAVFLRKLGYAAPSGNNTGLNVPMAVQAGLGEAGRGLLITQKFGPRIRIAKVYTDLELAP  
DKPRKFGVREFCRLCKKCADACPAQAISHEKDPKVLQPEDCESEENPYTEKWHVDSNRCSGFWAYNGGLCANCVAVCSFNKIEIETWNHDVARIATRIPLLQDA  
ARKFDEWFGYSGPVNPDRLERLESGYQNMVTDWFNNPESIKQ

>AneK\_0341 6786349

MTKTDRIYVLWGI GAVWALDLATFILLSDFHIAFALFVIAALGFVWGLRFQVTEPMRRAALGVTFWVAMALLFAPWPIPKPEYIVGEVHRFSEMEHG  
FSRVLTVGTGPNIAAGGLVYDPAQQSMTEWGWPPNFISGYPLARALFGGTTILMERLGRATTIGGEPANPLRYSWSNFQGEKRDKLGWNGDLLLLGEVA  
KAMGSAKATYTPHENTLMVKSIAWLSGPRIATAAVDPRWFYSHDLSTYGTPLPLKDAKDLKYVIQIFTDQDWTRIHNDAGTSWWSVNSGQAYSTSAWIGI  
RMAQMLRDMGYVARVGFGMNYENIETPASVSYSGIGEYGRLSDAVVPVTAGGLRFKSAITFDTFLEAGDPKQGWGITRMCANCDRCARACPVNSVPMGEPTV  
ENGVKIWOVDKDKCTFRGTGNLNGMCGACLAVCPYKPDFAFRVGNVYIRHSPIATYLFNIGHVGLDLDWDFEYSEASPYNVSRPARWIQEDPQWKR  
FPYQVQYIYTERDRSKNEEWASGVDPKMGKVGLSYKGTWTGKIPDRLLDASGRNRNVHWDYEGALPPNLPPLGKLLTPEEATALLKDGKAFSGASYSDD  
EVFPDRDPKYEKQTLTYEQAARMWAEK

>AneK\_0343 6786351

VRWKARELGCVALLAVGTAAWTAMTSAALVEREWRAWISLATALGCAALCAGLLAKRRGALLEGARARWTLRGVGLAALLALALVIPSDRSFPDKRVGAG  
TPTQAYDATTPQGNVDLGVKVERS RGPDRDELTFVYDVCVGVKVAHRAARDGAVAPAVEVEYEPVAVLAAQIKDEARALGAQVAGITELHPQFVQKNDNGQP  
VALHRYAIVIGTGLDYLASPSAPLWDRDYSSIEPEEVAALVLSGRSTNPAVPIPEVTEYRDTLEFYAEGGRVAVELAKAIRSLGYPARAHFGRWAEVQV  
IPLAIAAGLGEVKGNGMLINDRFGPRGSFAVVTTDIPLAVDRQRDLGVQEFRCVCKKCADACPVSAVPRGEAGAPAGGVSRRQVDGPKCWYLVKNPKCMAC  
TGACPFNKDILLAHRWAVALISRKSVANRLLVWLDLLGYGRSAFRLRDEARKALGAPGEAPRAGASPGPEARS

>AY013360 15809251

MENNEQRQQTGMNRRSFLKVGAAATTMGVIGAIKAPAKVANAAETMNYVPGPTNARSKLRPVHDFAGAKVRFVENNDEWLGTTKIISKVVKTTSEADAGFMOA  
VRGLYGPDPQRGFQFIKHPFGGTISWARNLIAEDVVDGDAEPTKTPIPDPEQMSQHIRDCCYFLRADEVGIGKMPYGYTHHVSDDTVGLMSKPVVEEC  
TPVTKIYPNVIVMIDQGIETMWASTGYDGISGMSMQSYFTSGCIAVIMAKYIGTLGYNARAHAKNYEAIMPVCIMAAGLGELSRGTGDAIHPRGLYRHK  
VAAVTDDLPLADPKPIDFGLLDFCRVCKCADNCPNDAITFDEDPEVEYNGYLRWNSDFKCKTEFRTTNEEGSSCGTCLKVCWPNSKEDSWFHKAGVWVWGSK  
EASTFLKSIDDFIGYGTETIEKYKWWLEWPEKYPLKPM

>AY013361 15809254

LYAWDEEKSRQKATFTDLKEASLIVKDAARFLGASLVGIAEYDQKWVYSTWYDFSTKESIPAEFFFPVKSVIVIAVDTDYRGLTSPSLISSAATGLGYSKM  
YRGLTSPSLISSAATGLGYSKMAETARKMATFIRMLGYNALPSGNDTAISIPLAIQAGLGELGRNGMLITPEYGP?

VRLKLVLDMPLOPKPITFGVVSQFCMKCKKCAYSCTGAIPLDSKPTMYGDSMSNCDGVLKWTDPERCYKFWALNGAECNSNCIACCPYNKWSWHHGLTQ  
RLRESIRDKPSVKKAEKNS?IEKNTVPSEPGTSMADQSSKREYNIVDYAICKAAAAISDY?AKDNCFVIEHQDLCEWSSKHNQSKMKFQTLHKL

>AY013362 15809256

EQKQFQMNRRKFLKAGVASALTAGMVGAMRTLPSVAEEAVASTGSSGVSNGARSKLHPKVDYGGASVRFVENNDQWLGTSGQIVGTVNRTHEAQGFNLALRGK  
LSSEAQVAMYHYNFVMKHPFDGALGIFSNYVSAENIVGGTPNQEKLIPDPEQMSQNIKDTAYFLRADEVGIGKMPYAYYSHKAPFSHEELIRDDISHSTP  
VTEKLPYVIVVTDQHLETMLASTGYDGISSQSMRGYHATAVISVILAQYIRNLGYNARAHHFANYAAAMPVPTIAAGLGELSRGTGDCVHPRGLYRHKVA  
AVTTDLPLL

>AY013363 17220532

MYAWDEEKSRQKATFTDLKEASLIVKDAARFLGRSLVIGIAEYDQKWVYSTWYDFSTKESIPAEFFFPVKSVIVIAVDTDYRGLTSPSLISSAATGLGYSKM  
AETARKMATFIRMLGYNALPSGNDTAISIPLAIQAGLGELGRNGMLITPEYGPVRLKLVLDMPLOPKPITFGVVSQFCMKCKKCAYSCTGAIPLDSKPT  
MYGDSMSNCDGVLKWTDPERCYKFWALNGAECNSNCIACCPYNKWSWHHGLTQRLKESIRDKPSVKKAEKNSGIEKNTVPSEPGTSMADQSSKREYNIV  
DYAICKAAAAISDYTAKDNCFVIEHQDLCEWSSKHNQSKMKFQDATQASFTVNRRAAMFLGANLVGIADYDKRYMHSGLSFEPKSVIVMGMFKDETRINSS  
IATASTGLGHSQMAGTEKKVATFIRELGFKAKPCGDETPVSIPLAIMAGLGEGRNLLVTRSMGQEFSCVRYLRIWI

>AY013364 15809258

MFRSSDRQ?KPQEQKQFQMNRRKFLKAGVASALTAGMVGAMRTLPSVAEEAVASTGSSGVSNGARS?LHPKVDYGGAS?  
RFVENNDQWLGTSGQIVGTVSRTHEAQGFNLALRGKLSSEAQVAMYHY?

FVMKHPFDGTLGIFSNYVSAENIVGGTPNQEKLIPDPEQMSQNIKDTAYFLRADEVGIGKMPYAYYSHKAPFSHEELIRDDISHSTPVTEKLPYVIVVMV  
DQPLETMLASTGYDGISSAQSMRGYHATAVISVILAQYIRNLGYNARAHHFANYAAAMPVPTIAAGLGELSRGTGDCVHPRLATATK

>AY013365 15809260

MENNEQRQQTGMNRRSFLKVGAAATTMGVIGAIKAPAKVANAAETMNYVPGPTNARSKLRPVHDFAGAKVRFVENNDEWLGTTKIISK?  
KKTSEADAGFMOAVRGLYGPDPQRGFQFIKHPFGGTISWARNLIAEDVVDGDAEPTKTPIPDPEQMSQHIRDCCYFLRADEVGIGKMPYGYTHHVSDD  
TVGLMSKPVVEECVPTVTKIYPNVIVMIDQGIETMWASTGYDGISGMSMQSYFTSGCIAVIMAKYIRTLGYNARAHAKNYEAIMPVCIMAAGLGELSRGTG  
DCAIHPRGLYRHKVAAVTDDLPLADPKPIDFGLLDFCRVCKCADNCPNDAITFDEDPEVEYNGYLRWNSDFKCKTEFRTTNEEGSSCGTCLKVCWPNSKEDS  
WFHKAGVWVWGSKEAASTFLKSIDDFIGYGTETIEKYKWWLEWPEKYPLKPM

>AY013366 15809263

MFRSSDRQ?KPQEQKQFQMNRRKFLKAGVASALTAGMVGAMRTLPSVAEEAVASTGSSGVSNGARS?LHPKVDYGGASVRFVENNDQWLGTSGQIVGTVNRTHE  
AEQGFNLALRGKLSSEAQVAMYHYNFVMKHPFDGALGIFSNYVSAENIVGGTPNQEKLIPDPEQMSQNIKDTAYFLRADEVGIGKMPYAYYSHKAPFSHEE  
ELIRDDISHSTPVTEKLPYVIVMVDQHLETMLASTGYDGISSAQSMRGYHATAVISVILAQYIRNLGYNARAHHFANYAAAMPVPTIAAGLGELSRGTGDCV  
VHPRLATATK

>AY013367 15809265

MEKKKPELSRRDFGKLIIGAGAAATIAFPVGPANAAEKEKNAEIROQFAMTAGSPIIVNDKLERIAQVRTAFTHTPTSMFKPNYKGEVKHWFLLSSCDEKV  
RQIENGENGPKMAKKNVGEARAGRALEAAGWTLD?  
NFGGSFGSYYPNRFMSLWSETMLNTQMWATVGLDRRPPDITDVELTNYVKFAARMAGADLVGVARLNRNWVYSGAVTIPDEQSWHKEIEKPIVFKDVPLP  
IETDDELIIPNTCDNVI VSGIAMNREMLQATPTSMACATVAF CYSRMGVDFMWCQPIRYMGYYAIPCCNTVGSVALAVEAGLQASRMGACITPEFGPNV  
RLTKVFTNMLPVDKPIDFGVTEFCETCKKARECPSKAITTEGPRTFEGRSIHNQSGKLQWQNDHSHKCLDYWPESGGNGCTFAVCPFTKGNIIWHDGVEWL  
IDNTRFLDPLMLGMDDALGYGAKRNITEIWDGKINTYGLDADHFRDTSVFRKDRVKKS

>AY165309 27228277

MSEKYHSTVTRRDFMKRLGLAGAGALGAAVLAENNLPHFEKFDVDDL SAGKALEGDHANKVNNHPWVWVTRDHEDPTCNIDWSLIKRYSGWNNQAYFLP  
EDYLSHPTYTGRRTIVDSKLEIELQGGKYRDSAFIESGIDWMKENIDPDYDPELGYGDRREDAL IYAATNGSHNCWENPLYGRYEGSRPYLSMRTMNGING  
LHEFGADIKTTNYPKWEGETPEENLLIMRTAARYFGASSVGAIKITDNVKKIFYAKAQPFCLGPWYITINMAEYIEYVPPVNDYALIPVFDIIPADQGHYSY  
KRFGGDDKIAVPNALDNIFTYITIMLPEKRFKYAHSIPMDPCSCIAYLPTFEVEARIQQFIAGLGYNSMGGGVEAWGPGSAFNLGSLGEGSRVSSSTIEPRYG  
SNTKGLRMLTDLPLAPTKPIDAGIREFCKTCGICAEHCPTQAI SHEGPRYDSPHWDCVSGYEGWHLDYHKCTNCTICEAVCPFFTMSNNSWVHNLVKSTVA  
TTPVFNFGFKMEEAFGYGPRYSRDEWASENPIRGASVDIF

>AY216592 28932809

MGEINRRNFLKASMLGAAAAVASASVVKGVVSPLVADAADIVAPITETSEFPYKVDQYQRYNSLKNFFEKTFDPEENKTPIKFHYDDVSKIITGKKDTGKD  
LPMLNAERLGIKGRPATHTETSILFHTQHLGAMLTQRHNETGWTGLDEALNAGAWAVEFDYSGFNAAAGGGPGSAIPLYPINPMTNEIANEPVMVPLYNWVN  
IDVESVRQQGQWKFESKEEASKILKATRLLGADLVGIAPYDERWYTYSTWGRKIQKPKMPNGRTKYLPWDLPKMLSGGGVEVFGHAKFEPDWEKYAGFKP  
KSVIVFVLEEDYEAIRTPSVISSATVGSYSYNSMAEVAYKIAVFLRKLGYAAAPCGNDTGISVPMVAQAGLGEAGRNLGLITQKFGPRHRIAKVYTDLELAP  
DKPRKFGVREFCLCKCADACPAQAI SHEKDPKVLQPEDCEASENPTYEKWHVDSERCGSFWAYNGSPCSNCAVAVCSWNKVVETWNHDVARVATQIPLQDA  
ARKFDEWFGYSGPVNPERLESYVQNMVDFWNNPESIKQ

>AY349165 45738229

MNLDRRSFLKASLVSAVAASAAAAAKETFAPLTAEEAEI IAPIRETAEPYQVDPKYQRLPAEKLAYLRMFDPEENKGP I KHFHDDVSKIITGKKDTGKDL  
PLLNAAESLGIKGRPATLSETGAIFSHHDGSLVPLREKEMGWRALDMALVVASWSVEYHYNGFTAPGSGPGGVIAHYFPNPMTNETGTETPVLGMYSDWNT  
KARERREQRQWKFESVEEASRIVKKAARFLGADMAGIAPYDDRWTFSTWCRPNLKPFLPNGRTEYFLTDPFKLMKGEVEVYGGSTVEADWEKYAGFTPKS  
VIAMTFEMDYEAARTAPSVLQGAAPGKYSYNSMGEVAYKVASFLREIGYNAVPSGNDTGMSVPIAVQAGLGEAGRSGLITQYKGRVRIAKVYTDLELVPDK  
PINIGAREFCRLCLKCADVCPAQAI SHVKDPWVLQPEDCTPSENPYTEKWQFDSQRCLSFAYNGDCGSCIAVCSWNKIDAWQHDVARIATQIPLVQDAAR  
KFDEWFGYNGPVNPEERIESGYIANMVKDFWKDTEPTK

>AY374245 38569296

VGLAGAGLGASAAISPVFHDVGEFMSPTAEWKRWPYVKNRELEDPTVELDWSLMYRSDGIWGTQNNPTQDFSLGAEAGAKRRAAAAAYSANAVKTNQSGMT  
LRDRALSSGNMYPIITFMGPASSTPESLGVPKWQGTPEENSKMIRAAMIHFGAAQVGMAEITDRVKTKLVREYDKDFTHKKYMFEDVVKYEGTDKLVFPD  
KVPLYDFAFTHPLNKEMFRSSPSSDIGSAGNSLRYQSFSIIQPRIQMFQVLYGTYCYGYTRPFNGAIPTTATATLTLGEGEARNNGAFISPEFGPCVGLFSL  
VTDLPLEPTPIIDAGMWRFCQCTCKCADECQAQCSIFEHEPTWVFKIYKEDTTHIPGRKQFWTDGIAACWSYKATIGCGACMGCTCFNTDIANIHTIVRA  
TLSTTPVFNFLWQADKFFGYGVHEDKEAWDMSQPTLGFDTAHTVTVGKDY



>AY374246 38569299

MGLTGAGLGTAAATPVFHDLDVDTASPSAEWKRPPWVKNREIDDPTEIDWDMMYRSDGRMVQVRSVQIKYLGEEVNRNRNAVGAKFATADGLKNDTPGLK  
VRDQALAAAGVMSMLPFMGMGMI PSISFMGPATATPEARGVAKYRGTPAENSRLRSALVFYGAQVGYGEVTRQRYKDKLFRTPDKGNAATAYQGAWPPPLTQC  
KQYFFEDVPVGYDTAEKMFVPANVPLYEFTFIVPMSKEMFRCSPPSALQNAANLSRYTAMAQIQPKIQAFIKSLGYQCYGYTLPMNGAVPTIASAVLTGLGE  
GARNIGAFNNPEFGSITGLFHLITDLEPLETTPIDAGMWRFCHTCTKCADACPWSAIPDHEPSPWDIPKLYGQEDTTHVPGKKQFWTNSVDCWLGRVQLGTC  
GACMGCTCFNTGKNAIHIDYVKATLSTTPVFNFSFLWQADKAFGYGLRAGEDLENWDMPPQITGGFDSTCGIQGGSY

>AY374247 38569302

MGILGTGLGTAATAATPVFHDLDIISPKAEWKRPPWVVKYREADNPTEIDWSLMMNRWDARQTAQAPGIQAKYLGADEIKKRYANVLTNKKVKAITHDTPGQT  
LRDYALSSGAGYFMNLPVYTFMGPQKVATPQSLVSPVWQGTPEENSRLRSVAVIFYGGGQVGFVGDQIKDKLVFTNHKGAANSIGFVENFP PPPALGKS  
YLFEDVEQYEGATTFVLPNSKQLYEFCFTVPMSKDMFRANESQIMYSANLSRYRFLGNIQNCIQEFIRSLGYTCYGYASPFSGMMPAIIASAQLTGITEGN  
RNNGFCTSPEYGPILGVFSLVTDMPLEPTNPIDAGIWRFCQCTKCADACPVNAIPKDHEPSPWELPTVYGKPDITHSRGRKQYWTNALDCWLFTEYNGCGA  
CMATCTFNNTNAP IHELVRITLATTPLLSFLWQADKFFGYGLTEDKEAWWDLSPVYGFDSAAATSSQGGYNK

>AY374248 38569305

LGLAGAGIGAVAAAAPVFDLDEVASADSSVNRKPPWVREVDKPTIEIDWSKTSLSLPPQEGCHLPLLLAEFVGDWRVNSAMAQGVAAALNAGAKTGSKEAI  
SLDDTSMQEAAWPHFIAHAGWREPVYPALEGAAP IPELVGQTYTHESFGVPRWESTPEENFALLKSAMRFFGAGQIASIELDANVKSMFVVDASRMF FNGP  
PMAYGFCNDNGYVTDTHFIIPNKARWVYTYTTPMPKEMRYTAPSGVCYANMSRYRLNQHETMACVQKFLGLGLYQGLQASAPVAVATLSGLGEM  
DRINQCVIPEEGAVVGIYKFTDLEPLVSKPIDFGAFRFCHSCRKCADTCPAKAISFEETPEWEPAGPWSGGKKAYYKNEPECKLYQHSATGCQICTGVC  
VFVNVTKAMIHEIVKSTLSTTGFIFNSFLWKADVAFVYGHDAEAWWDLPLRYGFDTMGVRDGGYK

>AY374249 38569308

IGMAGAVGAVAATPVFHDLELMSSSVTPAKRPPWVVKERELFNPTSEIDWDLMQRFDRKNEAHSRR IATMYRSVETIDAAA VTKKIDADRIAKQTPGF  
DTKYQALKAESGSTESPAWAYPGIVDEADWAKTPEELGMPKWSGTPEENSRLLYAALRYGAMF IGYAEVEDKWRNKL FVKTTTDAVRNWTWTPQNDPPE  
SDELRYVYENVDPQYSELKRGSTGRSAGKHVIPSPLWLTITATGACMEATKLDSTISKSNSSADNGHEALVTRTFNFVRALGGWRAPFGDGGHQTSESNF  
SAAMILTGLAENSROQNYCLTPEGTGNHIFPTMLTDFPLVPTKPIDAGLFRFCHSCRKCADACPSQISHADEPSPWVDPVGDGKPRVFCNPGHKGFWPDMA  
CNYYSKGGTSGCWVCYANCTFSEDKAAMHNIIRGTVSTSLFNFGFFSMSNTFGYGPYESPEVWDMSLPAYGFDSTIGAAGKGGYSK

>AY374250 38569311

MGMAGAGIGAVAAAPVFDLDELIASD TAVQPRPWWVKERPIDDPTEIVDFSMMERH DGRDQGGQ SARVRAIY GADRVLGAAALSAELAERTASNYPGYT  
YRSRALAGSFKRISQGTSPGWAETKDPAPVKTPPEERGEKWTGTPEEASRLRAMRAYGASLVGYTELQEHDRHVFISYEKGSNNEKYIGTTIPVTAAR  
PIFENVPKAYETTEKLVIPNVPLWEIAMSTQGSNELWRSAGTLLGGMANGNTFYNCANLHASTYNFLRYLGYQLIGTIGNDARYVYSEGGAAMAGLGEAS  
RQKLYTTLPEYAGPRLYGLVTDLEPLETHPIDAGIYRFCHSCRKCADSCPPQCSKEKEP SWDLPLETEKETIYSVKGTAFYNNLPLCROYSNETSHGCR  
ICWGECTFTVNRGALVHQIKGTIANIPLFNTYFYKLGDAFYGCTDPEKAEAWWDLSLPTLQDQDSTIVAADAGYK

>AY374251 38569314

LGLAGVIGGSAAGAPVFDLDELIASEGSSYSSPSAIHNAPWVVKERYDENTTTEIDWSQIIRLDQGDWQKLYPDRPQYGSFRILLNLPQDPMIPDPA  
PILEGYIKNKYPEGKGTQTRDHALQAADSATFGHISFLGVMFGLDRTRTPEQFVGPKHQGTPEENLKMCRALRLVGAHDVGNVPLENTRKLIYKSGITD  
TAVVKEYQFTDDEKLSENDTAWKIPNKLNNMLTYSMLNCTELCLGNTLSIPKYASDGVGNGAIGTLVAYQRSFIANFQLQNFHLHSLGYQSVRGASYNICPS  
TPFGTLAGIGEARMATVIVSPMYGATMRVCDRCLTDLPLAPT KPIDAGINKFCETCGICAECEPFGSLSKGSSWDHFLSNEPLNGNAPGFKGWRDLH  
CNYCGICQSAFCFNSVDNSVWVSLIKSTVGTTSIFNGFFANMEKNFYGFHNENWDMQEPVFGIKKEWLGDD

>AY374252 38569317

LGVVAGLGTLSAAAPVFDLDEVTS SAIGINKPWWVKERDFKNPTVPMWPK ITRHAGTFKTLPRPTVADFTKAGVVGSTSTDLLETPEMALTYDAMAKE  
FPGWTPGYAGMDTRTALCNASKFMMMGAWPGNMEMGGKRIINVQAAIMAGGSPFTPWLPGLDTRTPQDFGAPVWQGTPEENLKTCSRARIFFGGSDV  
AALELDDDLKFFHSHKIGKDLVIDEVEAYETTKMVIIPRCKWVLMWSARQSLGEGTRRQAGITENYAVWYSYRSLPKVGVQIQEFIRGLGYQALNPGMK  
YLTSPLAASFSGMGEHGRMSSPTITPKYGVNTRAMWALITDLEPLPTPPIDFGAYKFKCTCGICADACPFGLIQGDPWENPASAKSGIQGTFEGWRTNTA  
DCPHCTCQGTCPFNKPSDFLHAVVKGTVANTPLLSFFTNMEKAMYGRKDPPEEWDMDDFTYIDTYS

>AY374253 38569320

LGLIGAGVGAATAVSPVFRDLDEMASAP SARINMPWVVKQVDEPTTPIIDWNVPLTLGTACDDNNGVVPNIRTRAEYQKVMLDYTMQYDPDWKGTPLTGVP  
PSPDLNYPDYVDGIDKNALCVGATLGNAGLFPTEVIQATGGKYTTIQDRPQGWRCVKPVEQRGGTKWQGTPEEALKVRAARFYGFDDVTAIPVDDKFLKV  
MWGQKRLMATPTKFEFGDVFCTPEIQPMSKIVIPKRVKWFLLQSSRQLGEVTKHGVGTQCNAGQLTYVYNWIRTVKTIQEFVWGPYIISLDNINGRF  
APTGTGIMAGAGELARWAVMTPKYIMVVRMHGVSTDLPLEQSSPINFGGREFCKTCGICAEACPMDAIQKGEPSWEVNHKWDNPGYLHWRNDRSKCGHC  
PVCQPVCFFNADKSF IHELKGTVSTTPIFNSSFTGMDKNFYGRKPAEAWWESEQPVGGFDSSV

>AY374254 38569323

MESAAQKNSDRLEKELWPDYKASTRDLALANALSGVTFGTALNTQGGWVDPAPTEPEELGIPKWEPTPEENLMMIRAAFSVMGLGPMVGVSELNEKTNF  
VYEYTGDSWTWLPQGPSEHIFDDNISEFYRTQNPNTLHIPPSSHKYVISTHNLPLELDRTRYSPLGTPAEAISYSRVAIAKNFVEEFIRGLGYHVYVYGA  
LQPALVDFLGSVAEHSRMRGQNAVSPYEGMMRAHATFYTDLPLAFTNPFDAGLTKFCETCGICADACPVGSI SPVGTDRNWDNACQDWDANDIQNGGAETM  
YNIPGYKGRWCNTFSCMTTAAACGAACKFSCPFNLRNGSFMHSIVKATVSNSTLNFNGFRNMEETLKYGYMAKEPSSWETPEAWYVYGTNPNLSRQ

>CD1958 115249003

MFARANYKDDSTAYNDYKKNPDKKEIDDSIRNRPNLCSEGTMTYNELNSPMASSAFDFLSDIKSLCEGKVS DTKVDVDAKSMTKKIKGLAKQY GASVVGIT  
KLKDYHIYTNRGRHEENYGEEINLTHKYAIVFGCEMDKEMINRAPMICEVIETSKCYVDASIVGMILSYIRNLGYDARNHMDANYL VMPVFIARDAGLGD  
GRNAILTNKDYGSRLRLGVVTTDIPLLEDEYVDFGLEDFCKVCKKCSFNCP SHLSNDIKIGDDGKYNWVIEHETCYIKWRYLGTDCGMCSACPFSONLET  
IKNTTSFKGNNELIQKALDEYTSKFGKRIFIPGNPSWLK

>CD196\_1838 260211391

MFARANYKDDSTAYNDYKKNPDKKEIDDSIRNRPNLCSEGTMTYNELNSPMASSAFDFLSDIKSLCEGKVS DTKVDVDAKSMTKKIKGLAKQY GASVVGIT  
KLKDYHIYTNRGRHEENYGEEINLTHKYAIVFGCEMDKEMINRAPMICEVIETSKCYVDASIVGMILSYIRNLGYDARNHMDANYL VMPVFIARDAGLGD  
GRNAILTNKDYGSRLRLGVVTTDIPLLEDEYVDFGLEDFCKVCKKCSFNCP SHLSNDIKIGDDGKYNWVIEHETCYIKWRYLGTDCGMCSACPFSONLET  
IKNTTSFKGNNELIQKALDEYTSKFGKRIFIPGNPSWLK

>D328-MS 198404184

TETGVLFYSQHMGVMPORSKETGWTSLEALNAGAWAVEFDGSGFNATVGGGPGSLIPSYPINPMTNEMANDPVLVSGLYSWDNSDAEGVRQQNQWKFKS  
KEEASKIVKKAACFLGADLVGIAPYDDRWTYASWGRDIEKPFKLPNGKIYLPWDLPKMLSGGGIEVFGHTEFESDWEKYGGFKPKSVIVFVEMDIEALRT  
SPSVIASAAAGKAYSMSGEVSYKIAVFLRKLGYATSSGNDTGLNVPLAVQAGLGEAGRNLITQKFGPRHR IAKVYTDLELAPDKPRKFGVREFCRLCKK  
CADACPAQAI SHEKDPKVLQPGDCESENPYTEKWHVDGERGCSFWTYNGSPCAN

>D329-MS 198404186

TETAMLFTQHF GAMPQRHNEAGWTPVEAALNAGAWAVEFDGSGFNATVGGGPGSLIPSYPINPMTNEMAKEPVI VSGLYNWDNSDAEGVRQQNQWKFKS  
EEASKIVKKSVKFLGADLVGIAPYDERWTYSNWGREIPKPFKMPDGRTRYFPWDLPKMMSGGGVEVFGHAEFEPDGEKYGGFKPKSVIVFVLEDEYEAIRTS

PSVIAASATVGKTYSNMGEVAYKIAVFLRKLGYAVPAGNDTGMSPVMAVQAGLGEAGRNLITQKFGPRHRIAKVYTDLELAPDKPKKFGVREFCRLCKKC  
ADACPAQAISHEKDPKVLQPEDVEVSENPYTEKWYVDSERCSFWAYNGSPCVN  
>D333-WLm 198404180  
AETGVLFSSQHLGALEPLRSKEPGWTSLEQSLMVAGVSVEVFSGYTANGGGPGSIIPLYPRDPLTNETANDPVMVSGLYTWDNIDVEGVRQOQKQWKFESK  
EEASKILKATRLMGADLVGIAPYDDRWTYASWGRETNKLFKMPNGRTKYLPLWDLPKMLSGGGVEVFGHTQVEPDWEKYGGFKPKSVIIVLVFGEDVEALRTS  
PSDLATAAVGKIYSNMAEISYKVAIFLRLRLGYNAANCNDTSMISPLAVQAGLGEAGRNLITQKFGPRLRIAIVYTDLELAPDKPKKFGVDRFCRLCKKC  
ADACPAQAISHEKDPKVLQPEDCEVSESPYTEKWYVDGTRCGSYWAYNGGPCAN  
>D334-WLm 198404182  
AETGVLYFSQHI GAMLTORHNETGWTGLDMALKAGAFVDFDYSINCVMGGPGCVITPYPINPMTNEIANEPVVVPGLYNWDNIDVESVRQOQOQWKFESK  
EEASKMVKKAACFLGADLAGIAPYDERWTYSTWGRRILKPKCKMPNGRTKLPWDLPKMLSGGGVEVFGHAKFEPDWEKYAGFKPKSVIIVFVLEEDYEAI RTS  
PSDLATAAVGKIYSNMGVAYKIAVFLRKLGYAAPCGSDTGLNVPMVAVQAGLGEAGRNLITQKFGPRIRIAKIVYTDLELAPDKPRKFGVREFCRLCKKC  
ADACPAQAISHEKDPKVLQPEDCEVAENPYTEKWQFDSNRCGSFWAYNGSPCIN  
>D338-WL 336456982  
LGLAGAGIGAVASAPVFDHIDEFVSSEANSTKDPVYVVKHREHFDPTITVDWDIFDRYDGYQHKGVYEGPPDAPFTSWGRLQTRMSGEEQKKRILAAKKE  
RFPWGDGGLHGRGDQRADALFYAVTQPPFGSGEEGHGLFQYPYDQFGKFYARWGLYGPPhDSAPPDGSVPKWEGETPEDNFKLRRAAKYFGAGDVGALNLAD  
PKCKLIYKKAQPMTIYKGGTYSEIIGGPGMIDAKFYPKVDPDHAVPINFKEADYSYNDAAEWIIPTKCESIFFTLPPQPQELNKRRTGGIAGAGPCTVYKDFARV  
GTLVQMFINKLGYHALYWPIGWPGGCFTTFDGQGEQGRGTAAIHWKFGSSQRGSERVITDLP IAPTTPIDAGMFEFCKTCHIRRDVVCVSGGVHQEDEFPTWD  
SGNWNVQGYLGYRTDWSGCHNQCQCQSSCPFTYLGLKNASLVHKIVKGVVANTTVFNSFFTMEKALGYGLTMENSNWKEEGPIYGFDPGT  
>Dhaf\_0696 7257663  
VKMNLDRRSFLKASLVSAVAASAAAAAKETFAPLTAEEAEI IAPIRETAEFFYQVDPKYQRLPAEKLAYLRMFDPEENKGP IKFHDDVSKITGKKDGTGK  
DLPLLNAESLGIKGRPATLSETGAIFFSHHDSVLP LREKEMGWRALDMALVVASWSVEYHYNGFTAPGSGGGVIAHYFPNMTNETGTEPVFLAGMYSWD  
NTKARERREQGRQWKFESVEEASRIVKKAARFLGADMAGIAPYDDRWTFTWCRCRPNLKPFLKPNGRTEYFPTDFFKLMKGEVEVYGSTSVEADWEKYAGFTF  
KSVIAMTFEMDYEAIRTPASVQLGAAAPGKSYSNMGEVAYKVASFLREIGYNAVPSGNDTGMSPVIAVQAGLGEAGRSQGLITQKYGPRVRIAKVYTDLELVP  
DKPINIGAREFCRLCKCADVCPQAISHVKDPVWLQPEDCTPSENPYTEKWQFDSQRCLSFAYNGGDCGSCIAVCSWNKIDAWQHDVARIATQIPLVQDA  
ARKFDEWFGYNGPVNPEERIESGYIANMVKDFWKDTEPTK  
>Dhaf\_0711 7257678  
MSGVLDKNRDEQNEGYHNHNSKDNHARGPAAHRQPRI SRRGFLKTGAVAAAMVGMGAI VGP PKA KAVIDLGYRNSYIHEMHYTPVPKQWQSKLKPVDYGG  
SVRFVEHNDQWLGTTQIVGNIEKTNEDDGGFPLAIRGLLGEKSKYGFVSAIRYPLGDALMLPTQEI SKPEIVGGTPKPEKLPIDPEQMSQHMKDLAYYLR  
ADEVGIKMPYGYKSVMNPPGAYAGIVSLETPYENVPVTESLPYVICVAVEQHLETYMASTGYDGISLEQSFRSYHATANISVVI AQYIRNLGYQARA  
HHFGNYEAVMGPCLIAAGMGELTRTGDCVAHPRMGFRNKVAAVTTDLPLVPDKPIDFGMLDFCRVCMKCAENCPAEAITQDKDPVAFNGYLWRWNTDAKCAE  
FRTGNEEGVNCRCVKVCPWNSKEASWFHDAGI WIGSKGEAASLLKSIDDMFGYGTVEVTRYKWWLEWPELYKIRVPGQ  
>Dhaf\_0713 7257680  
MFRSSDRQNKQEQKQFMNRRKFLKAGVASALTAGMVGAMRTPVSAEAVASTGSSGVSNGARSKLHPKVDYGGASVRFVENNDQWLGTSQIVGTVNRTHE  
AEQGNLALRGKLSSEAVMAYHYNFVMKHPPDAGLGI FSNYVSAENIVGGTPNQEKLPIDPEQMSQNIKDTAYFLRADEVGIGKMPYAYYSHKAPFSHE  
ELIRDDISHSTPVTEKLPYIVVMVDQHLETMLASTGYDGISSAQSMRGYHATAVISVILAQYIRNLGNARAHHFANYAAAMPVPTIAGLGEISRTGDC  
VHPRLGYRHKVAAVTTDLPLLPDKPIDFGLDQFCRVCKKCADNCPSEAITHTDMEVYNGYLWRWNSDMKCAEFRLTNSGSSCGRCMKVCPWNSKEESWFH  
SAGI WIGSKGETSSRLKQIDDMFGYGEIIEKYKWWLEWPERYTLPKHL  
>Dhaf\_0737 7257704  
MENNQKROQSGMSRRSFLKVGAAATTMGVIGAI KAPAKVANAETLNYVPGSGKIRSKLRPVHDFAGAKVRFVENNDQWLGTTKILTKVKMTSEADAGFMQA  
VRGLYGPQKGFQFTQIAKDFGGSI SWARNLIAPEDVVDGAPEATKTPIDPEQMSQHIRDCCYFLRADEVGIGKMPYEGYTHHVADTVGLMTKPVVEECV  
TPVTKIYPNVIVMIDQGIETMWASTGYDGISGAMSMKSYFTSGCIAVILAKYIRTLGYNARAHHAKNYEAIMPVCI MAAGLGEISRTGDSAIHPRLGFRHK  
VAAVTTDLPLAPDQPLDFGLDFCRVCKKCADNCPNEAISFDDEDPIEYNGYLWRWNSDFRCKTEFRTTNEEGSSCGTCMKVCPWNSKEDSWFHKAGVWVGS  
ETASTFLKSIDDFGYGTETIEKYKWWLEWPEKYVMK  
>Dhaf\_2620 7259622  
MEASFDIALASAVNAHMYSQGLHVSVAAKDSDFQGVSEKRYEIKDPKEMSRLIKKIGALFGSPLVRIVKLNPEWSYEHAPGDGRGYKYGEPVDIPEHWQY  
GIIMGIPLSWETREGAPSFHTEFEYGNASMHCAEFAEFVKLGYPARENSPHARYEYIMPPHMVAAGIGEQQRLGVVVTPEFGPNFRPMVVTNMPLEPDK  
PIDVGIKFCMNCKICADQCPGSGSISFDGPKEINRGYDQWGINASTCHNFWMVSVNPGGCRVCLAVCPFSKESNWLHTTARDIAVRERTGITASTLTWMEKA  
FYGNTPHEHYHYKGTQFDYLVGEKPPWFESKDFLKEN  
>Dhaf\_pceA 89332194  
MGEINRRNFKVSIILGAAAAVASASAVKGMVSPLVADAADIVAPITETSEFPYKVDKAYQRYNSLKNFFEKTDFPEANKTPIKFHYDDVSKITGKKDGTGK  
LPTLNAERLGIKGRPATHTETSILFHTQHLGAMLTORHNETGWTGLDEALNAGAWAVEFDYSGFNATGGGPGSVIPLYPINPMTNEIANEPVMPVGLYNWDN  
IDVESVRQOQOQWKFESKEEASKIVKKAATRLLGADLVGIAPYDERWTYSTWGRIKIYKPKMPNGRTKYLPLWDLPKMLSGGGVEVFGHAKFEPDWEKYAGFKP  
KSVIIVFVLEEDYEAI RTS SPSVISSATVKGKSYSNMAEVAIKIAVFLRKLGYAAPCGNDTGISVPMVAVQAGLGEAGRNLITQKFGPRHRIAKVYTDLELAP  
DKPRKFGVREFCRLCKKCADACPAQAISHEKDPKVLQPEDCEVAENPYTEKWHLDSNRCSGFWAYNGSPCSNCAVCSWNKIVETWNHHDVARVATQIPLQDA  
ARKFDEWFGYNGPVNNDERLESYGQNMVVDKFWNNPESIKQ  
>DQ115513 73913555  
MGLAGAGIGAVSAAAPVFDHDEL TASSGGVQKLPWVVKEREFKDPVSPIDWQNLPKMEGTFPYQARPTLSAQERYAMGIPGGSSGTWASPEQAQVLFDMYK  
KEFPGWEPGYAGLGDNRITLALFMATKFMRMGMWPEINMGNRNVNQAILKQWARTLPPSFMGLRSSETLRPQDFGVPRWEGTPEENLTLRQVVRFLGGC  
DVGAQEMSDVFLKHEQSGGKQLVIENVEAAETPTKLVIPAKAKYIILQWARTQPYESTRRQAGEYEDAAVYYSYQRFPPVGAIIQEFIHALGYTAVSTHM  
MGYHTNAIATLTGMGECRMSSTPLVPKYGTTNRAMVWMMTDMPLMSTKPIDFGVYDFCKTCGICADSCFPGLIEKGDPSWEATQPGTRPFNGWRNTTTTC  
PHCPVCQGSFPNTNGDGSFIHDLVRNTVSVTPVFNSSFFANMEKTMGYGRKDSRDWNNIDDYTYGINTSY  
>DQ115514 73913558  
LGLGTVTLGSASALSPQFRDLDELANSKVVNKRGMVVKERDYGNPTIEIDWNLMKRRDLRGSNWDYASLMMAFPGGPPAFKANTPKQAAAATAKAKEIWP  
DYAGPTIRDKALSSSFASAYGHSGYCRSQNHGMPTIEIPAPRPSAINTPAWEGTPEENAAMLRAVFSLVGLGPVMTTMLDEKSNFIWEYSVSWTGD  
VPGNKHIVLDSGITESYVDATSFHIPTSQKYVIATHNISCDGFLRRSMAGAGFSSTEEMSVRVAYAKSIVEQFIRGLGYNVYGHDLQSAVAWDMWVSGVGE  
HCRMGOVIGSPEYGLLRTHAVFYTDLPLPVTNPIDAGFVKFCETCGICAECPVGAIQERGIDRSWDDNCGQSWADKQAGGSKVMYNIIPGYKGRCNLFS  
CAFTPCASACKSNCPNAIGDGSFVHSIVKSTVATSPIFNSFFTSMEGVLHYGKQDKDPASWVNSPDEWFIYGTHPPLLRO  
>Ferp\_2321 8779861  
MIVKIWENHPWLDITDKFKRFNOKYTMFSRTGWDKVKEMARKSVESVVRNIKYGRSSLLDYAFMSAGWVAIKGAPFQMDYDGGGLISWKS DISPIFISIA  
SPFWNEKLSERKFRKREDAENKPEKLRVVKVAKYFGADLVGVAEFDERWVYSARVLNPRYHIGKEFIEESLELPEVRYCIVLAIKEDYEMQSTADGGVSM  
GDIAGFYSKMAIVAGSLAEFLRALGFTAIPSGNDLALSIPYIASAGLGEYSRMGLLITKFKGPRVRLAKVFTDTPLKADKPVRFVGYEFLCKKCKCAEKCPA

KAIPFEDPSWKRTISNIEGIYKWHVDVEKCFEYWCXSGNLGCGVCVRCVPYNKPSGRTYF IHAFFREYIVPIVGGKVAKIFDLDLGYGKRKSSSEWWS  
>Glov\_2870 6369093  
MDRRDFFKKAALTSVAVAGAAV ISSPLKSSARLVLSKEQDEFYIEISSDFKGMPTNCIFCRVFSKDAVVEYVQKTYGLTKIDQMAMGLASSKDGfVHPEQ  
HGEPGFTAVDKALELAGWATNDEFSPYAEFGRRNSLIGTHIVNPVTGKIAKDKPVFVPLHTWDNSRAEYIEIKHGDGRYQFKDKQEAATDRIKRACRYLGADL  
VGVTSFERAQKWVYTNWLDLHP IKNTFPDGTVMKMTYDAMEAQGNFISAGYGVSPDFRAESGFEPKSVITLAWAMDYDAMKTAPSLVAGAAAGEGYSRLA  
EISYKVSFTLRLRLGKICAPCNDTAASIP IAIESGMGEGSRMGLITEKYGPRVRLAKIFTDIELVDPKPRTFGVKDFCKNCKMCKADACPAKAI SKDPAQVY  
KVGQETS VGKINKSHLAGVEHYVNAERCFGYVWATGTTCTGTCVAVCPYNKIDEWHHDLTKIATLTPFKPLRLHDELDFGYGGPLDKTRPKSKWFKDAVAD  
WNKA  
>Glov\_2872 6366908  
MDRRDFFRMAALTSVAVAGAAV ISSPQKSSARLVLSKEQDEFYIEISSDFKGMPTNCIFCRVFSKDAVVEYVQKTYGLTKIDQMAMGLASSKDGfVHPEQ  
HGEPGFTAVDKALELAGWATNDEFSPYAEFGRRNSLIGTHIVNPVTGKIAKDKPVFVPLHTWDNSRAEYIEIKHGDGRYQFKDKQEAATDRIKRACRYLGADL  
VGVTSFERAQKWVYTNWLDLHP IKNTFPDGTVMKMTYDAMEAQGNFISAGYGVSPDFRAESGFEPKSVITLAWAMDYDAMKTAPSLVAGAAAGEGYSRLA  
EISYKVSFTLRLRLGKICAPCNDTAASIP IAIESGMGEGSRMGLITEKYGPRVRLAKIFTDIELVDPKPRTFGVKDFCKNCKMCKADACPAKAI SKDPAQVY  
KVGQETS VGKINKSHLAGVEHYVNAERCFGYVWATGTTCTGTCVAVCPYNKIDEWHHDLTKIATLTPFKPLRLHDELDFGYGGPLDKTRPKSKWFKDAVAD  
WNKA  
>HeliMode\_pceA 171696369  
MIPRERHHRKDPAHRIDASRYRRFSVEDQAFVTVGMQDTGKKGILHFTEKMFASMMANIYSDVPGKSRLDYAADLGANALNLILGAYGFPNSRFLNWKPLFI  
PEALHRDKWEASTGDMTRVVKQAARLYGADLVGVARLDPKWVYAKDLEKPFVFEDEVPEERDRFVIPASVQTAIVIALAMNRELIEESPATAGSTAASLG  
YSRMAITAVSLAEFIRSLGYRAIPCMNDTALSIP LAIDAGLGLGRHLLITPEFGSNVRLCKVLTNMPLLADSPVDFGIARFCRNCLACADHCPSRSISTG  
EPSFEVACANNPQVEKWTIDAESCLRFQENHSCANCIACVCPFTAGDFTHCLD IDCDSGGCGLQEISYLRRKHGYPTRGNDDALAVNNPLTRQGL  
>Jann\_1968 3934419  
VSY PANRTPDHLES DRAAGFEISADFERFDQRNDIFTRAFWDERVKS KDTDAFFAS YRMEAAPRRGDGFTQKDFALRNAAWLISDIVSERSAEGLREGFQ  
GAIRDTPVAPDKADLGAPEAEAAEMKAVAKLFGADLVGITHFDARWHYSARPVTRMEAVPNDLPEGLGQVIMVGHAMDADLVETYP SALAGAATGREYSH  
EAAIVMQVAAAYVRNLGYRAVASMNDTALVIPYAIKAGLGEYGRNQMLTPEFGPRVRF SKIFTDMLAVDAPRAFGLKAYCEGCDVCAVACPVKALPFGAPE  
FGGKAPSALRGVKKWTSDAEACFGYWAKLRSDCAICMRVCPFTAPRAGVWDRLLWYKLA VGVGDTGRGIARKWAARRAKARVKPKDWAAALRS  
>SPO1738 3192799  
VTAMSY PANRDRTRPTDAAGIETTEAFERFAQRNDVFTRAMWDPQVRSKQTD AFFAS YRMEAAPRRGDGFTQKDFALRNAAWLISDVVTNRF AAEGREG  
FQAPISYDTPVAPQQVGVDDPAAMSAEIKRIARFFGADLCGVTELDERWHY TARVDTRDMSEAPLGLPDGLT SVIVLGHMERDLVATYPSALAGAATGREY  
SHEAAVVMQLATYIRNLGYEAVASMN DTLVPIPVAVKAGLGEYARNQMVITPEFGPRLRFSKVFTNLPLAHDVPRPRGVRAFCDICTACADACPVKALPYGP  
PSDVAPNVS AIRGVRKWTSDAEKCFGWAKLASDCAICMRVCPFNDRYARRRNLWLRALASPLRHLALRLARGHGKRRKPAEWAGT  
>Ssed1729 5610108  
MSEQEKQAVDESRRQLKIGAGTIAGVGVVAGAGT WIKQKVEGVEQDGYPVEI SPELKP KDQRDVL LTFACSPALAAKHPERNLSFSLDSEGP IKPGKAFN  
FOQHCQNF LTAPERADNTKVGYTQLDYALEEACWEGMNRMAPQAFGFPNQGMFGWDQSDVVDHKYPFEDSVEMISA IKTAAKTFGAVRVGICRPDKRWNYD  
PLYDAIQEKTLSWEEDFPFEPKSVI VMLTDMDYDAMATAPMI PASATAAMGYSHNTLQAGAMAKFLRLRLGYPAVGSNDLGN SVAYAI SAGLGEGARNGQII  
APGLGPRVRI SKVYTNLELDDAAYDKPRDFGILSFCENCKRCAESCPGNAISMDDKP SMSSTFAGNDDPDYNWQGGPGRIRKFHNDAKKCFKFWSDNGGDCGA  
CISSCPWNKPDFWHHRLIDGNTFTGGAVHSMKQADILFGYGNVDEKAVKFWRSRGSDF  
>Ssed2100 5612296  
MKEQEKDEQVIDQHRRQLKL SAGTIAGVAVAGAGS WIKHVRVEGVEQDGYPVEI SPSFKRKDQRDVL LTFAGSKALGEKHPERNLSLSNDADGPAKS GEKS  
FNFOKGIYQFATAHTRADNNKVGYTQLDYALEQACWGHMNILAPLES MGVPNQGTFGWDQSEVKKKYPFKDSVEILSAIKTAAKTFGAVRVGICRDKRWD  
YDPLYDLTQEKTLTWEEDFPFEPKSVI VMLTDMDYDAMATAPMI PASATAAMGYTQNTIQGGMAKFLRELGYMAVGSNDLGS SVSYAIAAGLGEGARNGA  
LIAPNLGPRVRI SKVYTNLELDDAAYDKPRDFGILSFCENCKRCAESCPGNAISMDDKP SMSSTFAGNDDPDYNWQGGPGRIRKFHNDAKKCFKFWSDNGGDC  
GACIASCPWNKPDFWHHRLIDASNTFTAGPVHTMMKQADILFGYGNVNDKAVEKFWRSRGSDF  
>TM1040\_3578 4075500  
MSIRFFSSRHRPVHLGPFPLERLRSHQADLSNVPAALPLNFRFPQKPD SIVNAMCEYQAMMDAIRDGLVNGTRGDVPADLQERSNHLKAFGYFADASVMGI  
GPMREEARLYEPWHNPDIRLAEDLKTROTKTLASGIDMIMADLKDAMQAPPTIGAHRAIVFLYEMPRDPRDEAGCDWITDAE AHRACLRS AETAVVLA  
NYIRLLGWAKAHTGTS SDVLDLNLAVAAGLVRMEEGQLVAPYLGTFRFLAAVTTDFELAE DRPLAPLSEQPGRAGRDLRWLWLGAGAERSALNGDPYKDRDF  
RDGPHPFETLKRVEPTTYIDEARVARVPKRADM FARAQFGDMGKGNQKAATGGFYVRKAAPAMAQRMLGAFVLLQDGT PAVGPRPTDAQRNADMVKAASY  
WLGIDAVGISRCPDWTWYSHDATGTPIVPDQPHASIMIVDQGFDTFEGTSGDDWIAVAQSMRAYLRFSLGGV IARQIRNLGYKAKAHTVMDGEVLQPPLLL  
LSGLGEVSRIGEVI LNPFLGPRKLSGVVTTDMPMAHDKPIDFGLOSFCESCNKARECPGSAITAGPKLMFN GYEIWKSDSKQCTTYRITTPGGAMCGRMK  
TCPWNLEGI FAEKPFRAAMNMPRAAPALARLDMLNGEMNPAKWWWDL ELEDGGYRPTRHVPVNRSLQKDLDLRYEDQTLAVYPAPLAPHYPYFPM  
DREAGIEAYQAMITAEYQERKARGETGDWDHIYKNDAESPVLVVVSKVEEMAEGVTKYEFRAADGADLPEWTAGAHLDIVVAPEFLRQYSMSGNADRSH  
YQIGVLREDAGRGGSKLLHRIFSEGRRIFVSRP INHFPLDETATRTFFLGGGIGVTPMIAMAHRLHALGADFEFHYSIKSRALGGYLRDLADVPWASKVNLH  
VSEGRANRFDQILGQYQSGWHLYTCGAAPYMDAVMQAAEQAGFPEEARHLEYFSVPEQPEYENHPFTLKLARS GRELQVRAEQTATDALAEHGHVDVKCA  
DGICGVCKGLISGEVEHRDFVLSKAQRRESIVLCQSRADPGGCVEIDL
